# Supplementary material
Source: PubMed Central journal article supplement (PMC1892928)
Supplement: pnas_0611217104_2.pdf [file pnas_0611217104_2.pdf]

**Table 3.**

List of top 20 proteins with the largest number of identified phosphorylation sites

|    | <b>RefSeq accession</b> | <b>Gene symbol</b> | <b>Protein name</b>                              | <b>Total number of sites identified (this study)</b> | <b>Novel sites</b> |
|----|-------------------------|--------------------|--------------------------------------------------|------------------------------------------------------|--------------------|
| 1  | NP_057417.2             | SRRM2              | SRm300 (serine/arginine repetitive matrix 2)     | 119                                                  | 71                 |
| 2  | NP_055554.1             | BCLAF1             | Bcl2-associated transcription factor 1           | 35                                                   | 28                 |
| 3  | NP_005830.2             | SRRM1              | SRm160 (serine/arginine repetitive matrix 1)     | 25                                                   | 22                 |
| 4  | NP_055792.1             | ACIN1              | Apoptotic chromatin condensation inducer 1       | 24                                                   | 20                 |
| 5  | NP_002366.2             | MAP4               | Microtubule-associated protein 4                 | 21                                                   | 18                 |
| 6  | NP_001008656.1          | TCOF1              | Treacher Collins-Franceschetti syndrome 1        | 16                                                   | 14                 |
| 7  | NP_001001520.1          | HDGF2              | Hepatoma-derived growth factor-related protein 2 | 15                                                   | 15                 |
| 8  | NP_005373.1             | NEF3               | Neurofilament 3                                  | 14                                                   | 10                 |
| 9  | NP_003371.2             | VIM                | Vimentin                                         | 13                                                   | 8                  |
| 10 | NP_002678.2             | PNN                | Pinin, desmosome associated protein              | 13                                                   | 11                 |
| 11 | NP_002408.2             | MKI67              | Antigen Ki-67                                    | 13                                                   | 6                  |
| 12 | NP_003600.2             | HIRIP3             | HIRA interacting protein 3                       | 12                                                   | 7                  |
| 13 | NP_005617.2             | SFRS4              | SRm75 (splicing factor, arginine/serine-rich 4)  | 12                                                   | 12                 |
| 14 | NP_003267.1             | TMPO               | Thymopoietin                                     | 11                                                   | 9                  |
| 15 | NP_001015877.1          | PHF6               | PHD finger protein 6                             | 10                                                   | 10                 |
| 16 | NP_057572.5             | PPHLN1             | Periphilin 1                                     | 10                                                   | 10                 |
| 17 | NP_005110.1             | THRAP3             | Thyroid hormone receptor associated protein 3    | 10                                                   | 7                  |
| 18 | NP_004629.2             | BAT2               | HLA-B associated transcript 2                    | 10                                                   | 10                 |
| 19 | NP_075385.1             | MARCKS L1          | MARCKS-like 1                                    | 9                                                    | 5                  |
| 20 | NP_005648.1             | TP53BP1            | Tumor protein p53 binding protein, 1             | 9                                                    | 7                  |
