# Supplementary material
Source: PubMed Central journal article supplement (PMC1892928)
Supplement: pnas_0611217104_3.pdf [file pnas_0611217104_3.pdf]

## Data Set 1

### A summary of all phosphopeptides identified in this study

#### Legends

ET : For comparison: Trypsin samples subjected to LC-MS/MS [ETD]  
 EL : For comparison: Lys-C samples subjected to LC-MS/MS [ETD]  
 EG : For comparison: Glu-C samples subjected to LC-MS/MS [ETD]  
 CT : For comparison: Trypsin samples subjected to LC-MS/MS [CID]  
 CL : For comparison: Lys-C samples subjected to LC-MS/MS [CID]  
 CG : For comparison: Glu-C samples subjected to LC-MS/MS [CID]  
 AG : For comparison: Glu-C samples subjected to alternating LC-MS/MS [CID/ETD]  
 AT : For comparison: Trypsin samples subjected to alternating LC-MS/MS [CID/ETD]  
 AL : For comparison: Lys-C samples subjected to alternating LC-MS/MS [CID/ETD]  
 ELX : Remainder of Lys-C samples subjected to LC-MS/MS [ETD]  
 "/" : C-terminal type fragment  
 "\" : N-terminal type fragment  
 "|" : Both C-terminal type AND N-terminal type fragment  
 CS : Charge state  
 Mode : Type of fragmentation  
 n,k,nk : novel, known, notknown  
 Predic. : Predicted protein

| # | Exp. | Number of phosphorylation sites |      |       | ▼ Sequence with fragments                             | Literature lookup | RefSeq#        | Gene   |
|---|------|---------------------------------|------|-------|-------------------------------------------------------|-------------------|----------------|--------|
|   |      | CS                              | Mode | Score |                                                       |                   |                | Symbol |
| 1 | AG   | 3                               | CID  | 17.45 | 1 (E)G/G P E/A P/I P/P/P/P Q P R E K V s S I\D\L E(I) | S18 =n            | NP_001010972.1 | ZYX    |
| 2 | CT   | 2                               | CID  | 12.79 | 1 (R)s/P G A P/G P L T L K(E)                         | S1 =k             | NP_001010972.1 | ZYX    |
| 3 | AT   | 2                               | CID  | 17.62 | 1 (R)V S S G Y V P/P/P V/A\t/P F S S K(S)             | T12 =n            | NP_001010972.1 | ZYX    |
| 4 | EL   | 4                               | ETD  | 16.72 | 2 (K)R/R N R N A s A\s F Q E L E D K\K(E)             | S7 =n,S9 =n       | NP_055192.1    | ZRF1   |
| 5 | ELX  | 4                               | ETD  | 11.35 | 1 (-)m N E/y P K/K R\K(R)                             | Y4 =n             | NP_057415.1    | ZNF639 |
| 6 | ET   | 4                               | ETD  | 8.6   | 3 (K)T K\s/S S K L\s s C I/A/A/I\A/A L/S/A K(K)       | S3 =n,S8 =n,S9 =n | NP_060651.2    | ZNF532 |
| 7 | ET   | 4                               | ETD  | 11.44 | 1 (K)I/S/L S K S P\t\K t D P K/N E\E E\E\K(R)         | T10 =n            | NP_861446.2    | ZNF326 |

| #  | Exp. | CS | Number of phosphorylation sites |       | Sequence with fragments                                                                                           | Literature lookup      | RefSeq#     | Gene Symbol |
|----|------|----|---------------------------------|-------|-------------------------------------------------------------------------------------------------------------------|------------------------|-------------|-------------|
|    |      |    | Mode                            | Score |                                                                                                                   |                        |             |             |
| 8  | ELX  | 4  | ETD                             | 24.27 | 3 (K)R/R/t R s\R\s P E S Q V I G E\N\T\K(Q)                                                                       | T3 =n,S5 =n,S7 =n      | NP_005446.2 | ZNF265      |
| 9  | ELX  | 3  | ETD                             | 11.27 | 1 (K)Y K L/D E D E D E\D D\A/D\L s\K(Y)                                                                           | S15 =n                 | NP_005446.2 | ZNF265      |
| 10 | ELX  | 3  | ETD                             | 21.41 | 1 (K)Y/N L D A s E E E\D S N\K\K(K)                                                                               | S6 =k                  | NP_005446.2 | ZNF265      |
| 11 | CL   | 5  | CID                             | 16.85 | 1 (K)R R R D\s D G V D G\F/E/A E/G/K K(D)                                                                         | S5 =n                  | NP_057191.2 | ZFR         |
| 12 | EL   | 4  | ETD                             | 14.14 | 1 (K)R/R R D s/D G V D\G F E A E\G\K\K(D)                                                                         | S5 =n                  | NP_057191.2 | ZFR         |
| 13 | ELX  | 4  | ETD                             | 6.67  | 1 (K)G K s/G E G E N\T D K(L)                                                                                     | S3 =n                  | NP_078997.2 | ZFHX4       |
| 14 | ELX  | 4  | ETD                             | 19.98 | 2 (K)T/R R L s S\A\s T G K P\P\L S/V E\D\D F E\K(L)                                                               | S5 =n,S8 =n            | NP_055642.2 | ZC3H11A     |
| 15 | ELX  | 4  | ETD                             | 14.49 | 3 (K)T/R R L s/s/A\s\T G\K P P\L S V E D D\F/E\K(L)                                                               | S5 =n,S6 =n,S8 =n      | NP_055642.2 | ZC3H11A     |
| 16 | ELX  | 4  | ETD                             | 7.8   | 2 (K)T/R\R L s S A S\T G K P\P L S V\E\D\D F E\K(L)                                                               | S5 =n,T9 =n            | NP_055642.2 | ZC3H11A     |
| 17 | ELX  | 3  | ETD                             | 14.37 | 1 (K)s Y/L/S G/G\A G A/A/G G G A D P G N\K(K)                                                                     | S1 =n                  | NP_003394.1 | YY1         |
| 18 | ELX  | 3  | ETD                             | 24.89 | 1 (K)A A D P P\A E N S s A\P E A E Q/G\G\A\E(-)                                                                   | S10 =n                 | NP_004450.2 | YBX1        |
| 19 | CL   | 3  | CID                             | 15.07 | 1 (K)K/T/P/S/K P P A\Q/L s/P S V P\K(R)                                                                           | S11 =n                 | NP_006288.1 | XRCC1       |
| 20 | EL   | 4  | ETD                             | 21.44 | 1 (K)T/K P T\Q A A G P S s P Q K/P P T P E E T\K(A)                                                               | S11 =n                 | NP_006288.1 | XRCC1       |
| 21 | EL   | 4  | ETD                             | 16.23 | 2 (K)T/K/P T Q A A G P\S s/P Q K/P P t P E E T\K(A)                                                               | S11 =n,T17 =n          | NP_006288.1 | XRCC1       |
| 22 | AL   | 3  | CID                             | 12.11 | 2 (K)T K/P/T Q A A\G P S s/P/Q\K P P t/P E E\T K(A)                                                               | S11 =n,T17 =n          | NP_006288.1 | XRCC1       |
| 23 | ELX  | 4  | ETD                             | 15.68 | 1 (K)S/K P\E L P P G/L\S P\E/A T A P\V t\P S R P E G G E P\G L\S\K(T)                                             | T18 =n                 | NP_115721.1 | WIBG        |
| 24 | ET   | 3  | ETD                             | 8.34  | 2 (R)V/Q/E\H/E D s/G D s E V\E N E/A K(G)                                                                         | S7 =k,S10 =k           | AAH25276.1  | WDR50       |
| 25 | EL   | 3  | ETD                             | 9.59  | 1 (K)R K s E L/E/F\E T L\K(T)                                                                                     | S3 =n                  | NP_061918.3 | WDR44       |
| 26 | ELX  | 4  | ETD                             | 17.06 | 2 (K)R K s\E/L E\F/E T L K\t P\D I D V P\K(E)                                                                     | S3 =n,T12 =n           | NP_061918.3 | WDR44       |
| 27 | CL   | 2  | CID                             | 14.07 | 1 (K)V/G/N E s/P/V/Q/E/L K(Q)                                                                                     | S5 =n                  | NP_061918.3 | WDR44       |
| 28 | EL   | 5  | ETD                             | 11.9  | 3 (K)Y K G y V N S/S S Q I\K\A/S F S\H D F t y L/V/S\G S/E D K(Y)                                                 | Y4 =n,T20 =n,Y21 =n    | NP_061918.3 | WDR44       |
| 29 | ET   | 4  | ETD                             | 24.4  | 1 (R)D/G P P/L R G s N m/D/F\R E P T E E E\R(A)                                                                   | S8 =n                  | NP_071496.1 | WBSCR1      |
| 30 | ET   | 4  | ETD                             | 9.25  | 1 (R)F R D G P P L R/G s N m D F R\E P T E E\E\R(A)                                                               | S10 =n                 | NP_071496.1 | WBSCR1      |
| 31 | EG   | 4  | ETD                             | 7.67  | 1 (E)T/R D/G Q V I\N\E t/S/Q/H H\D D\L\E(-)<br>(K)L/L/E G E E/S R I/S L P L P/N/F S S\L N\L R E T\N\L/D/s\L P\L V | T10 =n                 | NP_003371.2 | VIM         |
| 32 | EL   | 5  | ETD                             | 12.38 | 1 D\T/H S\K(R)                                                                                                    | S28 =n                 | NP_003371.2 | VIM         |
| 33 | AL   | 4  | ETD                             | 24.04 | 1 (K)T/V/E T R\D\G Q/V I N E T s Q H H D\D\L\E(-)                                                                 | S14 =n                 | NP_003371.2 | VIM         |
| 34 | ET   | 3  | ETD                             | 19.74 | 1 (R)D/G/Q V I N E T s Q H H D\D\L\E(-)                                                                           | S9 =n                  | NP_003371.2 | VIM         |
| 35 | AT   | 3  | CID                             | 17.87 | 1 (R)D/G/Q V I N E T/s\Q\H H D D\L\E(-)                                                                           | S9 =n                  | NP_003371.2 | VIM         |
| 36 | CT   | 3  | CID                             | 17.05 | 1 (R)D/G/Q V I N E/t S\Q\H H D D\L\E(-)                                                                           | T8 =n                  | NP_003371.2 | VIM         |
| 37 | ET   | 3  | ETD                             | 22.89 | 1 (R)E/T N L\D s L P L V\D T H S\K(R)                                                                             | S6 =n                  | NP_003371.2 | VIM         |
| 38 | AT   | 3  | CID                             | 15.23 | 1 (R)E T/N/L/D s/L/P/L/V/D/T H S K(R)                                                                             | S6 =n                  | NP_003371.2 | VIM         |
| 39 | AT   | 3  | ETD                             | 17.74 | 1 (R)m/F\G G P\G T A S R P s S\S\R(S)                                                                             | S12 =k,S13 =nf         | NP_003371.2 | VIM         |
| 40 | CT   | 3  | CID                             | 12.96 | 1 (R)m/F G/G/P G/T A S R\P\S S s R(S)                                                                             | S14 =n,S12 =nf,S13 =nf | NP_003371.2 | VIM         |
| 41 | AT   | 3  | CID                             | 12.74 | 2 (R)m F G/G/P G T A S R P S s s R(S)                                                                             | S13 =k,S14 =n,S12 =nf  | NP_003371.2 | VIM         |
| 42 | ET   | 3  | ETD                             | 11.69 | 2 (R)m/F/G G P G T A s R P S s s R(S)                                                                             | S9 =n,S13 =k,S12 =nf   | NP_003371.2 | VIM         |

| #  | Exp. | CS | Number of phosphorylation sites |       | Sequence with fragments                                                           | Literature lookup    | RefSeq#        | Gene Symbol |
|----|------|----|---------------------------------|-------|-----------------------------------------------------------------------------------|----------------------|----------------|-------------|
|    |      |    | Mode                            | Score |                                                                                   |                      |                |             |
| 43 | AT   | 3  | ETD                             | 8.67  | 2 (R)m/F/G G P G t\A S R P s S S\R(S)                                             | T7 =n,S12 =k,S13 =nf | NP_003371.2    | VIM         |
| 44 | ET   | 3  | ETD                             | 4.33  | 2 (R)m F\G G P G T A s R P s S S\R(S)                                             | S9 =n,S12 =k,S13 =nf | NP_003371.2    | VIM         |
| 45 | AT   | 2  | CID                             | 17.13 | 1 (R)S L/Y A S/s/P/G/G/V/Y/A T R(S)                                               | S6 =k,S1 =nf         | NP_003371.2    | VIM         |
| 46 | CT   | 2  | CID                             | 16.58 | 1 (R)S L/Y A s/s/P/G/G/V/Y A/T R(S)                                               | S5 =n,S1 =nf,S6 =nf  | NP_003371.2    | VIM         |
| 47 | AT   | 2  | CID                             | 15.29 | 1 (R)S L/Y A S S P/G G V/Y A T R(S)                                               | Y11 =n,S1 =nf,S6 =nf | NP_003371.2    | VIM         |
| 48 | ET   | 2  | ETD                             | 5.85  | 1 (R)S/L/Y/A/s/S P/G/G/V/Y A\T\R(S)                                               | S5 =n,S1 =nf,S6 =nf  | NP_003371.2    | VIM         |
| 49 | AT   | 3  | CID                             | 16.22 | 1 (R)T Y s/L/G/S A/L/R/P S\T S R(S)                                               | S3 =k,S6 =nf,S11 =nf | NP_003371.2    | VIM         |
| 50 | ET   | 3  | ETD                             | 13.92 | 1 (R)T/Y s L G S/A/L R\P S T S\R(S)                                               | S3 =k,S6 =nf,S11 =nf | NP_003371.2    | VIM         |
| 51 | ET   | 3  | ETD                             | 11.05 | 2 (R)T/Y s/L\G/S A L R P\s T S\R(S)                                               | S3 =k,S11 =k,S6 =nf  | NP_003371.2    | VIM         |
| 52 | EL   | 4  | ETD                             | 30.14 | 1 (K)L/R K/V s K Q E E A\S G G P T A P\K(A)                                       | S5 =k                | NP_003361.1    | VASP        |
| 53 | AT   | 3  | CID                             | 23.15 | 1 (R)K R s/E L\S\Q/D A E P A G S\Q E T\K(D)                                       | S3 =n                | NP_006640.2    | UTP14A      |
| 54 | ET   | 3  | ETD                             | 6.18  | 1 (R)K R s\E L S Q/D\A E P A G S\Q E\T\K(D)                                       | S3 =n                | NP_006640.2    | UTP14A      |
| 55 | EL   | 5  | ETD                             | 16.48 | 2 (K)R/E R D/R E R E P\E A A s S/R G s P V R\V\K(R)                               | S13 =n,S17 =n        | NP_006581.2    | USP39       |
| 56 | EL   | 4  | ETD                             | 26.11 | 1 (K)R/E R E V D E D s E P E R E V R\A\K(N)                                       | S9 =n                | NP_006581.2    | USP39       |
| 57 | EL   | 4  | ETD                             | 10.92 | 2 (K)G/R/P A L A S Q E S\s/L/S S t S P/S\ S P\L P V\K(V)                          | S11 =n,T15 =n        | NP_065769.2    | USP31       |
| 58 | CL   | 4  | CID                             | 16.41 | 1 (K)N H S V N E E\E Q E Q G E G s E/D E W E/Q V/G P R N K(T)                     | S16 =k               | NP_005144.1    | USP10       |
| 59 | CT   | 3  | CID                             | 17.66 | 2 (K)K A/P A G Q E E P/G t P/P s S P L/S A E Q L\D R(I)                           | T11 =k,S14 =n        | NP_003353.1    | UNG         |
| 60 | ELX  | 5  | ETD                             | 10.97 | 2 (K)T A A V A\N S m\N\y L T/K/K G M/s\ S K(E)                                    | Y10 =n,S17 =n        | NP_001020948.1 | UGCG11      |
| 61 | EL   | 4  | ETD                             | 11.92 | 1 (K)K V E E D E A/G G R\F/V\A\F S G E G\Q s\L/R\K(K)                             | S20 =n               | NP_001030324.1 | UFD1L       |
| 62 | EG   | 4  | ETD                             | 14.04 | 1 (E)R G K L P\E s P K R\A\E\E(I)                                                 | S7 =k                | NP_055048.1    | UBTF        |
| 63 | EL   | 3  | ETD                             | 17.3  | 1 (K)R/K A s Q L V G I E\K(K)                                                     | S4 =n                | NP_054895.1    | UBE2T       |
| 64 | ELX  | 5  | ETD                             | 11.92 | 1 (K)N/Q R/Q D Y L N/G A V/s G S V Q/A\T/D\R\L m\K(E)                             | S12 =n               | NP_060052.3    | UBE2Q1      |
| 65 | EL   | 3  | ETD                             | 20.98 | 1 (K)N/P S D S A V H s P F T\K(R)                                                 | S9 =k                | NP_055662.2    | UBAP2L      |
| 66 | CT   | 2  | CID                             | 16.15 | 1 (K)N/P/S D/S A/V H s P F\T K(R)                                                 | S9 =k                | NP_055662.2    | UBAP2L      |
| 67 | CL   | 3  | CID                             | 15.4  | 1 (K)N/P S/D/S A/V/H/S\P\F\T K(R)                                                 | T12 =n,S9 =nf        | NP_055662.2    | UBAP2L      |
| 68 | EL   | 3  | ETD                             | 8.31  | 1 (N)P S/D S A V H s\P\F\T\K(R)                                                   | S8 =k                | NP_055662.2    | UBAP2L      |
| 69 | EL   | 4  | ETD                             | 16.69 | 1 (K)E/E/H G/G L I R s P R H\E\K(K)                                               | S9 =n                | NP_001012496.1 | U2AF2       |
| 70 | AT   | 4  | ETD                             | 10.5  | 1 (R)G/A/K E E/H\G\G L I R\s\P\R(H)                                               | S12 =n               | NP_001012496.1 | U2AF2       |
| 71 | CT   | 4  | CID                             | 16.94 | 1 (K)S s P G Q P E A G P\E G A/Q E/R P S Q A\A\ P A V\E A\E G P G S\ S Q\A P R(K) | S2 =n                | NP_787048.1    | TXLNA       |
| 72 | CT   | 3  | CID                             | 20.47 | 1 (R)R/P\E G P G\A Q A P\S s/P R(V)                                               | S12 =n               | NP_787048.1    | TXLNA       |
| 73 | ET   | 3  | ETD                             | 17.28 | 1 (R)R P E G P G A Q A P S s P\R(V)                                               | S12 =n               | NP_787048.1    | TXLNA       |
| 74 | CT   | 4  | CID                             | 14.59 | 2 (R)E T/s R/L A W T\N V/A/s/E V Q V T K L K(V)                                   | S3 =n,S12 =n         | NP_003310.2    | TTN         |
| 75 | ELX  | 3  | ETD                             | 8.28  | 1 (K)s K\T S E N S S A K(R)                                                       | S1 =n                | NP_443165.1    | TSGA13      |
| 76 | CG   | 4  | CID                             | 13.97 | 1 (E)G Y/G F/G/S/G/D/D P Y/S S/A E/P H V s G V K/R S R S G E G E(V)               | S19 =n,S26 =nf       | NP_005753.1    | TRIM28      |
| 77 | CG   | 3  | CID                             | 19.98 | 1 (E)T K/P V L m A L/A E G P G A\E/G P R/L\A/s/P S G\ S T S S G\L\E(V)            | S21 =n               | NP_005753.1    | TRIM28      |

| #   | Exp. | CS | Number of phosphorylation sites |       | Sequence with fragments                                             | Literature lookup | RefSeq#        | Gene Symbol |
|-----|------|----|---------------------------------|-------|---------------------------------------------------------------------|-------------------|----------------|-------------|
|     |      |    | Mode                            | Score |                                                                     |                   |                |             |
| 78  | EL   | 4  | ETD                             | 26.62 | 1 (K)R/S R/s/G E G E V S G L m\R(K)(V)                              | S4 =k             | NP_005753.1    | TRIM28      |
| 79  | EL   | 4  | ETD                             | 26    | 1 (K)R/S R s G E G E V S G L M\R(K)(V)                              | S4 =k             | NP_005753.1    | TRIM28      |
| 80  | AL   | 4  | CID                             | 14.18 | 1 (K)R S R s/G E G E V S G L/m R K(V)                               | S4 =k             | NP_005753.1    | TRIM28      |
| 81  | AL   | 4  | CID                             | 12.25 | 1 (K)R S R\s/G E G E V S G L M\R(K)(V)                              | S4 =k             | NP_005753.1    | TRIM28      |
| 82  | CT   | 3  | CID                             | 24.06 | 1 (R)G A A A A/A/T/G Q P/G T A P A G t/P G A P P L/A/G m A I V\K(E) | T17 =n            | NP_005753.1    | TRIM28      |
| 83  | CT   | 3  | CID                             | 22.25 | 1 (R)G A A A A A/T/G Q P/G T A P A G t/P G\A P/P L A G\M A I V\K(E) | T17 =n            | NP_005753.1    | TRIM28      |
| 84  | AT   | 2  | CID                             | 15.54 | 1 (R)L D/L D/L/T/A D s Q P P V F K(V)                               | S9 =n             | NP_005753.1    | TRIM28      |
| 85  | AT   | 2  | CID                             | 15.43 | 1 (R)s G\E G E V S G L/m\R(K)                                       | S1 =k             | NP_005753.1    | TRIM28      |
| 86  | ET   | 3  | ETD                             | 20.69 | 1 (R)S/R s G E G E V S G L m\R(K)                                   | S3 =k             | NP_005753.1    | TRIM28      |
| 87  | CT   | 3  | CID                             | 16.51 | 1 (R)s R S G E G E V S G L/m\R(K)                                   | S1 =n,S3 =nf      | NP_005753.1    | TRIM28      |
| 88  | CT   | 3  | CID                             | 16.32 | 1 (R)S R s G E\G E V S G L M R(K)                                   | S3 =k             | NP_005753.1    | TRIM28      |
| 89  | CT   | 3  | CID                             | 10.48 | 1 (R)s R/S G E/G E V S G/L M R(K)                                   | S1 =n,S3 =nf      | NP_005753.1    | TRIM28      |
| 90  | AT   | 3  | CID                             | 9.72  | 1 (R)S R s G E/G E V S G L m R(K)                                   | S3 =k             | NP_005753.1    | TRIM28      |
| 91  | ET   | 3  | ETD                             | 9.05  | 1 (R)S/R/s\G E G E V S G L M\R(K)                                   | S3 =k             | NP_005753.1    | TRIM28      |
| 92  | ELX  | 3  | ETD                             | 6.64  | 1 (K)L/E/L K S\A/Q/K D/L Q/s A\D\K(E)                               | S12 =n            | NP_005870.2    | TRAIP       |
| 93  | CT   | 2  | CID                             | 15.79 | 1 (R)L D/S Q/P Q E T/s/P E L P R(R)                                 | S9 =k             | NP_006691.1    | TRAFD1      |
| 94  | ELX  | 4  | ETD                             | 23.21 | 2 (K)T P\A Q P Q/R R s L R\L s A Q\K(D)                             | S9 =k,S13 =k      | NP_036244.2    | TPX2        |
| 95  | CG   | 2  | CID                             | 24.77 | 1 (E)G N I/D D/s L/I G G N A S A E G P E G E(G)                     | S6 =k             | NP_003286.1    | TPT1        |
| 96  | AL   | 2  | CID                             | 15.12 | 1 (K)E G/V/Q/G/P L/N V/s/L/S/E E\G K(S)                             | S10 =n            | AAB48030.1     | TPR         |
| 97  | EL   | 2  | ETD                             | 14.09 | 1 (K)E/G/V/Q/G P/L/N V\s\L\S\E\E\G\K(S)                             | S10 =n            | AAB48030.1     | TPR         |
| 98  | CL   | 3  | CID                             | 13.87 | 1 (K)R P s T S Q T V\S/T/P/A P V P V/I E\S T E A I\E A K(A)         | S3 =n             | AAB48030.1     | TPR         |
| 99  | AT   | 3  | CID                             | 19.52 | 1 (R)T D/G F/A/E A/I/H s/P\Q V A G V P R(F)                         | S10 =n            | AAB48030.1     | TPR         |
| 100 | ET   | 3  | ETD                             | 16.76 | 1 (R)T/D/G/F A E A I H/s P Q V A G V P\R(F)                         | S10 =n            | AAB48030.1     | TPR         |
| 101 | ELX  | 5  | ETD                             | 15.04 | 2 (K)Q E G Q L R A Y\G\A G L L s S I G E L K H A L s D K A C V\K(A) | S14 =n,S24 =n     | NP_775489.2    | TPH2        |
| 102 | AL   | 3  | ETD                             | 17.45 | 1 (K)L/G/D M R N s A T F\K(S)                                       | S7 =n             | NP_003279.2    | TPD52L2     |
| 103 | AL   | 3  | CID                             | 10.92 | 1 (K)L/G D M/R N s A/T F K(S)                                       | S7 =n             | NP_003279.2    | TPD52L2     |
| 104 | EL   | 3  | ETD                             | 17.56 | 1 (K)s/F E D R V G T I\K(S)                                         | S1 =n             | NP_003279.2    | TPD52L2     |
| 105 | EL   | 3  | ETD                             | 15.02 | 1 (K)S/F/E D R V G t I\K(S)                                         | T8 =n             | NP_003279.2    | TPD52L2     |
| 106 | ET   | 4  | ETD                             | 19.69 | 2 (R)K/L G D m R N s\A T F K\s\F E D\R(V)                           | S8 =n,S13 =n      | NP_003279.2    | TPD52L2     |
| 107 | ET   | 3  | ETD                             | 13.58 | 1 (R)N/S/A T F K/s F E D\R(V)                                       | S7 =n             | NP_003279.2    | TPD52L2     |
| 108 | AG   | 3  | ETD                             | 17.23 | 1 (E)D/V/K N s P T F K S F E\K(E)                                   | S5 =n             | NP_001020423.1 | TPD52       |
| 109 | AG   | 3  | ETD                             | 13.9  | 1 (E)D/V/K/N S P/t\F\K S\F E E/K\VE(N)                              | T7 =n             | NP_001020423.1 | TPD52       |
| 110 | AT   | 3  | ETD                             | 18.9  | 1 (K)K/L E D V K N s P T F\K(S)                                     | S8 =n             | NP_001020423.1 | TPD52       |
| 111 | AT   | 3  | CID                             | 14.55 | 1 (K)K/L E\D\V\K N S\p\T\F\K(S)                                     | T10 =n            | NP_001020423.1 | TPD52       |
| 112 | ET   | 4  | ETD                             | 19.66 | 2 (K)K/L E D V K N s P\T F K s F\E\K(V)                             | S8 =n,S13 =n      | NP_001020423.1 | TPD52       |

| #   | Exp. | CS | Mode | Number of phosphorylation sites |   | Sequence with fragments                                                                                               | Literature lookup                 | RefSeq#        | Gene Symbol |
|-----|------|----|------|---------------------------------|---|-----------------------------------------------------------------------------------------------------------------------|-----------------------------------|----------------|-------------|
|     |      |    |      | Score                           | ▼ |                                                                                                                       |                                   |                |             |
| 113 | ET   | 3  | ETD  | 14.33                           | 1 | (K)L/E D V K N s P T F\K(S)                                                                                           | S7 =n                             | NP_001020423.1 | TPD52       |
| 114 | EL   | 4  | ETD  | 20.05                           | 2 | (K)A/S S/L/H R\T s\S G T s\L S A m H S\S G S S\G\K(G)                                                                 | S8 =n,S12 =n                      | NP_005648.1    | TP53BP1     |
| 115 | EL   | 4  | ETD  | 14.55                           | 1 | (K)A/S/S/L H R T S\S\G T S L S A/m/H\S S G S\S G K(G)                                                                 | S9 =n                             | NP_005648.1    | TP53BP1     |
| 116 | AL   | 3  | ETD  | 17.12                           | 1 | (K)L/I/T S E E E R s P A\K(R)                                                                                         | S9 =n                             | NP_005648.1    | TP53BP1     |
| 117 | EL   | 4  | ETD  | 16.55                           | 2 | (K)R R s N V S S\A t P\T A S S S\S S\T T P T R\K(I)                                                                   | S3 =n,T10 =k,S6 =nf,S7 =nf        | NP_005648.1    | TP53BP1     |
| 118 | EL   | 4  | ETD  | 9.53                            | 3 | (K)R/R s\N/V/s/S P A T P/T A S\S\S S s t\T P T R\K(I)                                                                 | S3 =n,S6 =k,T19 =n,S7 =nf,T10 =nf | NP_005648.1    | TP53BP1     |
| 119 | EL   | 4  | ETD  | 10.08                           | 1 | (K)T/S G/T E P A D/F\A L P S S R G\G P\G\K\L s P R\K(G)                                                               | S22 =n                            | NP_005648.1    | TP53BP1     |
| 120 | ET   | 4  | ETD  | 20.17                           | 1 | (R)K/L I T S E E E R s P A K(R)                                                                                       | S10 =n                            | NP_005648.1    | TP53BP1     |
| 121 | ELX  | 3  | ETD  | 15.82                           | 1 | (K)R/A L/P N N T/S S s P Q P K(K)                                                                                     | S10 =k                            | NP_000537.2    | TP53        |
| 122 | CL   | 3  | CID  | 12.95                           | 1 | (K)E A/Q Q/K/V P D E E\N E E/s\D N\E K(E)                                                                             | S15 =k                            | NP_001058.2    | TOP2A       |
| 123 | CL   | 3  | CID  | 18.76                           | 2 | (K)E L K/P/Q K s V V/s D/L/E/A\D D V K(G)                                                                             | S7 =n,S10 =k                      | NP_001058.2    | TOP2A       |
| 124 | EL   | 3  | ETD  | 12.46                           | 2 | (K)E/L/K/P Q K s V\V s D L E A D D V\K(G)                                                                             | S7 =n,S10 =k                      | NP_001058.2    | TOP2A       |
| 125 | CL   | 3  | CID  | 14.75                           | 1 | (K)I K N E/N T E G/s P Q/E/D G V/E/L E/G\L\K(Q)                                                                       | S9 =k                             | NP_001058.2    | TOP2A       |
| 126 | CL   | 2  | CID  | 17.07                           | 2 | (K)s V/V s/D/L/E A/D D V K(G)                                                                                         | S1 =n,S4 =k                       | NP_001058.2    | TOP2A       |
| 127 | ELX  | 4  | ETD  | 10.92                           | 1 | (K)K m S\s K G/L S/G K K(R)                                                                                           | S4 =n                             | NP_055309.1    | TNRC6A      |
| 128 | EL   | 3  | ETD  | 13.57                           | 2 | (K)N t S\T t S/T G/N K(N)                                                                                             | T2 =n,T5 =n                       | NP_009046.2    | TNFAIP6     |
| 129 | EL   | 3  | ETD  | 5.52                            | 2 | (K)A t K K t D K/P R Q E D\K(D)                                                                                       | T2 =n,T5 =n                       | NP_001027454.1 | TMPO        |
| 130 | CT   | 3  | CID  | 16.65                           | 2 | (K)G P P D/F\s s/D/E/E/R E\P T P V L G/S/G A A A A G R(S)<br>(K)G P P D/F S S S D E\E R E P T P/V L G s G A A A/A G/R | S6 =k,S7 =k                       | NP_001027454.1 | TMPO        |
| 131 | EL   | 5  | ETD  | 9.24                            | 2 | s\R\A A V G R\K(A)                                                                                                    | S19 =n,S27 =n,S6 =nf,S7 =nf       | NP_001027454.1 | TMPO        |
| 132 | EL   | 3  | ETD  | 13.89                           | 1 | (K)L/A/s/E/R N\L F I S\C\K(S)                                                                                         | S3 =n                             | NP_003267.1    | TMPO        |
| 133 | CL   | 3  | CID  | 14.17                           | 1 | (K)S S S S S S S Q P E H S A M L V S T/A A s/P S L\I\K(E)                                                             | S20 =n                            | NP_003267.1    | TMPO        |
| 134 | ELX  | 3  | ETD  | 9.33                            | 1 | (K)Y/G V N P G P I/V G t\T R\K(L)                                                                                     | T11 =n                            | NP_001027454.1 | TMPO        |
| 135 | CT   | 2  | CID  | 17.21                           | 1 | (R)S s T P L P/T I/S S/S/A/E/N T R(Q)                                                                                 | S2 =n,S11 =nf                     | NP_001027454.1 | TMPO        |
| 136 | ET   | 2  | ETD  | 5.69                            | 1 | (R)S/S/t P/L P/T/I S/S/S A E/N T\R(Q)                                                                                 | T3 =n,S11 =nf                     | NP_001027454.1 | TMPO        |
| 137 | CT   | 3  | CID  | 16.79                           | 1 | (R)V/L L F L S Q F\C/I L s G G E\S T E\I\P\Y V m\K(C)                                                                 | S12 =n                            | NP_079417.1    | TM2D3       |
| 138 | EL   | 5  | ETD  | 14.4                            | 1 | (K)N H H E L/D\H R E R E S\S A\N\N S V s P/S/E\S L R A\S E K(H)                                                       | S19 =k                            | NP_005069.1    | TLE3        |
| 139 | EL   | 5  | ETD  | 13.87                           | 2 | (K)N H H\E\L\D\H R E R E S S A\N\N s/V S P S E\s\L R A\S\E\K(H)                                                       | S17 =n,S23 =n,S19 =nf             | NP_005069.1    | TLE3        |
| 140 | AT   | 5  | CID  | 14.87                           | 1 | (K)T H K P\D P/G t P Q H/T S/S R\A\A P E P Q K(A)                                                                     | T8 =n                             | NP_004808.2    | TJP2        |
| 141 | CL   | 3  | CID  | 20.13                           | 1 | (K)s R E D/L S\A Q P/V Q T K(F)                                                                                       | S1 =n                             | NP_003248.2    | TJP1        |
| 142 | CL   | 3  | CID  | 16.41                           | 2 | (K)D Q/Q P/s G s/E G/E/D/D/D/A E/A\A\L\K(K)                                                                           | S5 =n,S7 =n                       | NP_060206.2    | THUMPDI     |
| 143 | CL   | 3  | CID  | 12.21                           | 2 | (K)D/Q Q P/s G s/E G E D\D\A E A A L K K(E)                                                                           | S5 =n,S7 =n                       | NP_060206.2    | THUMPDI     |
| 144 | AT   | 4  | CID  | 18.01                           | 2 | (K)F T/D/K D\Q\Q P/s/G s/E/G E D\D D A E A A L K K(E)                                                                 | S9 =n,S11 =n                      | NP_060206.2    | THUMPDI     |
| 145 | ET   | 4  | ETD  | 11.5                            | 1 | (-)m s/K/T/N K/S K S\G S R(S)                                                                                         | S2 =n                             | NP_005110.1    | THRAP3      |
| 146 | ELX  | 5  | ETD  | 18.39                           | 1 | (K)E/D R/G K R\s E/G/G\H R G F/V/P E\K(N)                                                                             | S7 =n                             | NP_005110.1    | THRAP3      |
| 147 | ELX  | 3  | ETD  | 15.42                           | 1 | (K)G R K E s E\F D D E P\K(F)                                                                                         | S5 =n                             | NP_005110.1    | THRAP3      |

| #   | Exp. | Number of phosphorylation sites |      |       | Sequence with fragments                                         | Literature lookup | RefSeq#     | Gene Symbol |
|-----|------|---------------------------------|------|-------|-----------------------------------------------------------------|-------------------|-------------|-------------|
|     |      | CS                              | Mode | Score |                                                                 |                   |             |             |
| 148 | ELX  | 4                               | ETD  | 27.39 | 1 (K)H/G/L A H D E m K\s P/R E P\G Y\K(A)                       | S10 =n            | NP_005110.1 | THRAP3      |
| 149 | ELX  | 4                               | ETD  | 15.11 | 1 (K)H/G/L A H D E M K\s P R E P G Y\K(A)                       | S10 =n            | NP_005110.1 | THRAP3      |
| 150 | ELX  | 3                               | ETD  | 8.31  | 2 (K)K/s P V G K s P P S T G S T Y/G/S S Q\K(E)                 | S2 =n,S7 =k       | NP_005110.1 | THRAP3      |
| 151 | ELX  | 4                               | ETD  | 20.26 | 2 (K)s P E I/H R R\I\D I s P\S T F R\K(H)                       | S1 =n,S11 =k      | NP_005110.1 | THRAP3      |
| 152 | ELX  | 4                               | ETD  | 10.48 | 2 (K)W/A/H D/K F/S G E E G E I E D D/E/s G t\N\R E E\K(D)       | S18 =k,T20 =n     | NP_005110.1 | THRAP3      |
| 153 | AG   | 5                               | ETD  | 9.19  | 1 (E)Q t K/A L V\T Q\L T/L/F/N\Q I L/V E(L)                     | T2 =n             | NP_009043.1 | THBS3       |
| 154 | EL   | 3                               | ETD  | 14.91 | 2 (K)D s/S N K/s G/A/E/A K(T)                                   | S2 =n,S6 =n       | NP_006455.2 | TGOLN2      |
| 155 | ET   | 5                               | ETD  | 11.32 | 1 (K)V A/s G E Q K/E\D/Q/S/E/D/K K(R)                           | S3 =n             | NP_057011.2 | TGFB111     |
| 156 | AT   | 2                               | CID  | 14.61 | 1 (R)F I Q E L S G/S s/P K(R)                                   | S9 =k             | NP_003214.1 | TFAP4       |
| 157 | CT   | 2                               | CID  | 17.39 | 1 (K)Y L L/G/D A P V s/P S/S Q K(L)                             | S9 =n             | NP_061848.2 | TERF2IP     |
| 158 | CG   | 4                               | CID  | 16.75 | 1 (E)A/K P Q\Q A A/G/m\L/s/P K T G\G K E(A)                     | S11 =n            | NP_000347.2 | TCOF1       |
| 159 | ELX  | 5                               | ETD  | 10.67 | 1 (K)A G/K/T G N S m P\H P A t/G\K\T/V/A N/L L S G\K S P R\K(S) | T13 =n            | NP_000347.2 | TCOF1       |
| 160 | EL   | 5                               | ETD  | 8.7   | 1 (K)A N\p A\A A R\A\p s A/K G T\I/S A/P G K(V)                 | S10 =n            | NP_000347.2 | TCOF1       |
| 161 | ELX  | 4                               | ETD  | 28.98 | 1 (K)A/P Q V R A A S A P A K E s P R\K(G)                       | S14 =n            | NP_000347.2 | TCOF1       |
| 162 | ET   | 4                               | ETD  | 18.59 | 1 (K)D/D P D G K Q\E A K P Q Q A/A G m L\s P\K(T)               | S19 =n            | NP_000347.2 | TCOF1       |
| 163 | EL   | 4                               | ETD  | 7.43  | 2 (K)E s P R/K G A A\p/A P P G K t G/P A\A K(A)                 | S2 =n,T15 =n      | NP_000347.2 | TCOF1       |
| 164 | EL   | 4                               | ETD  | 6.08  | 1 (K)G t\I/S A/P G K/V/V/T/A A A Q/A K(Q)                       | T2 =n             | NP_000347.2 | TCOF1       |
| 165 | ELX  | 5                               | ETD  | 8.93  | 1 (K)K K K K\L\G A G\E/G\G\E/A s V/S P E K(T)                   | S14 =k            | NP_000347.2 | TCOF1       |
| 166 | ELX  | 3                               | ETD  | 22.75 | 1 (K)K/L\G A G E\G G E\A S V s P E\K(T)                         | S13 =k,S11 =nf    | NP_000347.2 | TCOF1       |
| 167 | CT   | 3                               | CID  | 14.34 | 1 (K)K L G A G E\G G\E A S V s/P E K(T)                         | S13 =k,S11 =nf    | NP_000347.2 | TCOF1       |
| 168 | ET   | 4                               | ETD  | 22.55 | 1 (K)K/L G A/G E G G E A S V/s P\E K\T S\T\T\S\K(G)             | S13 =k,S11 =nf    | NP_000347.2 | TCOF1       |
| 169 | CT   | 4                               | CID  | 14.61 | 1 (K)K L G A G\E G\G\E A S V s/P E K T S/T T S\K(G)             | S13 =k,S11 =nf    | NP_000347.2 | TCOF1       |
| 170 | CT   | 2                               | CID  | 14.03 | 1 (K)L G A/G E/G/G E A S\V s/P E K(T)                           | S12 =k,S10 =nf    | NP_000347.2 | TCOF1       |
| 171 | ET   | 3                               | ETD  | 14.54 | 1 (K)L/G A G/E G G E/A/S V s P E K T S T T\T\S\K(G)             | S12 =k,S10 =nf    | NP_000347.2 | TCOF1       |
| 172 | ELX  | 5                               | ETD  | 7.87  | 2 (K)Q E\D/S E\s\S\E E\E S D S E E A/A\A S/P/A Q/V K/T/s V K(K) | S6 =n,S26 =n      | NP_000347.2 | TCOF1       |
| 173 | ELX  | 4                               | ETD  | 26.48 | 2 (K)R/K L s G/D Q P A A R t P R\S\K(K)                         | S4 =n,T12 =n      | NP_000347.2 | TCOF1       |
| 174 | EL   | 4                               | ETD  | 21.58 | 1 (K)R/K L s G\D Q P A A R T P R S\K(K)                         | S4 =n             | NP_000347.2 | TCOF1       |
| 175 | ELX  | 4                               | ETD  | 21.1  | 2 (K)R/K L s G/D Q P A A R T P R s\K(K)                         | S4 =n,S15 =n      | NP_000347.2 | TCOF1       |
| 176 | EL   | 4                               | ETD  | 18.41 | 2 (K)R/K L s G/D Q P/A A R t P R\S\K(K)                         | S4 =n,T12 =n      | NP_000347.2 | TCOF1       |
| 177 | ELX  | 3                               | ETD  | 18.68 | 1 (K)S/L G/N I L Q A K P T S s P A\K(G)                         | S13 =n            | NP_000347.2 | TCOF1       |
| 178 | EL   | 4                               | ETD  | 9.25  | 1 (K)T/H Q I R A\A L\A\p A K\E s P R\K(G)                       | S14 =n            | NP_000347.2 | TCOF1       |
| 179 | ET   | 3                               | ETD  | 17.13 | 1 (K)T/S/Q V/G A A S A P A K E s P\R(K)                         | S14 =n            | NP_000347.2 | TCOF1       |
| 180 | AT   | 3                               | CID  | 14.02 | 1 (K)T/S/Q/V G A\A\A S/A/P A K E s/P R(K)                       | S14 =n            | NP_000347.2 | TCOF1       |
| 181 | ELX  | 3                               | ETD  | 18.4  | 1 (K)T/S/Q/V/G/A A S A P\A\K E s P R\K(G)                       | S14 =n            | NP_000347.2 | TCOF1       |
| 182 | CL   | 3                               | CID  | 14.83 | 1 (K)T S/Q/V G A\A S/A/P/A K\E s P R K(G)                       | S14 =n            | NP_000347.2 | TCOF1       |

| #   | Exp. | CS | Number of phosphorylation sites |       | Sequence with fragments | Literature lookup                                                                                   | RefSeq#              | Gene           |        |
|-----|------|----|---------------------------------|-------|-------------------------|-----------------------------------------------------------------------------------------------------|----------------------|----------------|--------|
|     |      |    | Mode                            | Score |                         |                                                                                                     |                      | ▼              | Symbol |
| 183 | ET   | 3  | ETD                             | 16.31 | 2                       | (R)K/L s G D Q P A A R t P\R(S)                                                                     | S3 =n,T11 =n         | NP_000347.2    | TCOF1  |
| 184 | EL   | 5  | ETD                             | 24.17 | 1                       | (K)H/R K L s E L E R P\H\K(V)<br>(K)N E G N L E N/E/G K P E\D/E V E P/D D\E G\K/s D/E E E\K P D V/E | S5 =n                | NP_003189.1    | TCEB3  |
| 185 | ELX  | 5  | ETD                             | 10.21 | 1                       | G\K(T)                                                                                              | S23 =n               | NP_001006934.1 | TCEAL3 |
| 186 | ELX  | 3  | ETD                             | 12.67 | 1                       | (K)T/D/E/E R P P/V E H s P E\K(Q)                                                                   | S11 =n               | NP_001006640.1 | TCEAL1 |
| 187 | AL   | 4  | CID                             | 10.94 | 1                       | (K)D E/T N/A R D T y V/S/S/F/P R A P S T S/D/S V R L K(C)                                           | Y9 =n                | NP_006747.1    | TCEA1  |
| 188 | EL   | 4  | ETD                             | 14.4  | 1                       | (K)E P A I T S Q N s P\E A/R E E/S T S S G N V/S N\R\K(D)                                           | S9 =k                | NP_006747.1    | TCEA1  |
| 189 | AL   | 4  | ETD                             | 12.43 | 1                       | (K)E/P\A I T S Q N s/P E\A R\E E s t/S S G N V S N\R\K(D)                                           | T17 =n,S9 =nf        | NP_006747.1    | TCEA1  |
| 190 | AL   | 4  | ETD                             | 11.74 | 1                       | (K)E/P A I T S Q N S P E A R\E E S T\ S s G N V S N\R\K(D)                                          | S19 =n,S9 =nf        | NP_006747.1    | TCEA1  |
| 191 | ET   | 3  | ETD                             | 16.35 | 1                       | (K)K/K/E P A I T S Q N\s/P E A\R(E)                                                                 | S11 =k               | NP_006747.1    | TCEA1  |
| 192 | AL   | 5  | ETD                             | 25.79 | 1                       | (K)K/K E/P A I T S Q N s P E/A R E E S T S S G N V S\N R\K(D)                                       | S11 =k               | NP_006747.1    | TCEA1  |
| 193 | ET   | 3  | ETD                             | 14.17 | 1                       | (K)L/L/D G P s T E K D L D E\K(K)                                                                   | S6 =n                | NP_006747.1    | TCEA1  |
| 194 | AL   | 4  | CID                             | 12.81 | 3                       | (K)N/A s T/R I G M s V N\A\I\R/K Q S/T\ D E E V T S L A/K s L I K(S)                                | S3 =n,S9 =n,S28 =n   | NP_958845.1    | TCEA1  |
| 195 | EL   | 5  | ETD                             | 18.96 | 1                       | (K)S/Q P/R/R\R H A s A P S H V\Q P\S D S E\K(N)                                                     | S9 =n                | NP_055647.1    | TBC1D4 |
| 196 | CL   | 3  | CID                             | 19.83 | 1                       | (K)E L Q/Q E\L Q\E\Y\E V V T E/S E K(R)                                                             | Y9 =n                | NP_116185.2    | SYAP1  |
| 197 | EL   | 3  | ETD                             | 11.11 | 1                       | (K)E L/Q Q\E L Q E y E V V T E S\E\K(R)                                                             | Y9 =n                | NP_116185.2    | SYAP1  |
| 198 | CL   | 4  | CID                             | 17.62 | 1                       | (K)S N G R E Q D/L P L A E/A/V/R\P/K t/P P V V I K(S)                                               | T18 =k               | NP_116185.2    | SYAP1  |
| 199 | CG   | 2  | CID                             | 10.58 | 1                       | (E)D/G/D G T D D/F\ t/D K E\D\E(K)                                                                  | T10 =n               | NP_059973.2    | SURF2  |
| 200 | EL   | 4  | ETD                             | 21.27 | 1                       | (K)K M/s D D E D D/D E\E E Y G K E E H\E\K(E)                                                       | S3 =n                | NP_003161.2    | SUPT6H |
| 201 | CL   | 4  | CID                             | 19.04 | 1                       | (K)K M\s D\D\E D D D E E E/Y G K E/E H E K(E)                                                       | S3 =n                | NP_003161.2    | SUPT6H |
| 202 | CL   | 2  | CID                             | 13.6  | 1                       | (K)L/E G Q G D V P t P K(Q)                                                                         | T9 =n                | AAQ76039.1     | SUGT1  |
| 203 | ELX  | 5  | ETD                             | 24.39 | 2                       | (K)R P A S P s/S P E H L P A/t P A E/S P\A Q R F E A\R I\E D G\K(L)                                 | S6 =n,T14 =n         | NP_071936.2    | SUDS3  |
| 204 | ELX  | 4  | ETD                             | 17.38 | 2                       | (K)T/G/E T S R/A L s/S/s K Q\S S S/R D D N m/F/Q I G\K(M)                                           | S9 =n,S11 =n         | NP_006704.2    | SUB1   |
| 205 | ELX  | 4  | ETD                             | 14.89 | 2                       | (K)T/G/E T/S\R A L s S/S K Q S S S/S/R D\ N m F Q I G K(M)                                          | S9 =n,S17 =n         | NP_006704.2    | SUB1   |
| 206 | ELX  | 4  | ETD                             | 12.01 | 1                       | (K)T/G/E T S/R A L S\ S K Q\S s S S R\ D N m F/Q I\G K(M)                                           | S15 =n               | NP_006704.2    | SUB1   |
| 207 | EL   | 3  | ETD                             | 18    | 1                       | (K)E/G/G/A R L/G A\G G G s P E\K(S)                                                                 | S12 =k               | NP_005852.2    | STUB1  |
| 208 | AT   | 3  | CID                             | 19.34 | 1                       | (R)L/G/A/G/G/G s/P E K S P S A Q E L K(E)                                                           | S7 =k,S11 =nf        | NP_005852.2    | STUB1  |
| 209 | AT   | 3  | ETD                             | 18.19 | 1                       | (R)L/G/A G/G G s P E K S P S A Q E L\K(E)                                                           | S7 =k,S11 =nf        | NP_005852.2    | STUB1  |
| 210 | CT   | 2  | CID                             | 10.68 | 1                       | (K)E S K/D P A/D/E\ t E\A\ D(-)                                                                     | T9 =n                | NP_005554.1    | STMN1  |
| 211 | CT   | 2  | CID                             | 14.8  | 1                       | (K)E S/V/P/E/F P L/s/P P K(K)                                                                       | S9 =k                | NP_005554.1    | STMN1  |
| 212 | ELX  | 3  | ETD                             | 11.14 | 1                       | (K)E/S/V P E F P L s P P K\K(K)                                                                     | S9 =k                | NP_005554.1    | STMN1  |
| 213 | EL   | 3  | ETD                             | 19.22 | 2                       | (K)R/A s G Q A F E L I L\s P R\ S\K(E)                                                              | S3 =k,S12 =k         | NP_005554.1    | STMN1  |
| 214 | ELX  | 3  | ETD                             | 17.94 | 2                       | (K)R A s\G Q A\F E/L/I\ L\ S P R s\K(E)                                                             | S3 =k,S15 =n,S12 =nf | NP_005554.1    | STMN1  |
| 215 | ELX  | 3  | ETD                             | 15.35 | 1                       | (K)R A\ S\G\Q A\F E L I L s P R\ S\K(E)                                                             | S12 =k,S3 =nf        | NP_005554.1    | STMN1  |
| 216 | CL   | 4  | CID                             | 11.41 | 2                       | (K)R A\s G\Q A F/E/L/I L/S P R s K(E)                                                               | S3 =k,S15 =n,S12 =nf | NP_005554.1    | STMN1  |
| 217 | EL   | 2  | ETD                             | 7.26  | 1                       | (K)s/H/E/A/E\V\L\K(Q)                                                                               | S1 =k                | NP_005554.1    | STMN1  |

| #   | Exp. | CS | Number of phosphorylation sites |       | Sequence with fragments                                   | Literature lookup                  | RefSeq#     | Gene Symbol |
|-----|------|----|---------------------------------|-------|-----------------------------------------------------------|------------------------------------|-------------|-------------|
|     |      |    | Mode                            | Score |                                                           |                                    |             |             |
| 218 | CT   | 2  | CID                             | 17.71 | 1 (R)A S G Q/A/F/E L I L s/P R(S)                         | S11 =k,S2 =nf                      | NP_005554.1 | STMN1       |
| 219 | CT   | 2  | CID                             | 15.17 | 2 (R)A s/G Q/A/F/E L/I/L s/P R(S)                         | S2 =k,S11 =k                       | NP_005554.1 | STMN1       |
| 220 | ET   | 3  | ETD                             | 29.01 | 1 (R)R K/s H E/A E V/L K(Q)                               | S3 =k                              | NP_005554.1 | STMN1       |
| 221 | EL   | 3  | ETD                             | 11.5  | 1 (K)G T/A/L/H S s\Q\K P A E P V\K(R)                     | S7 =n                              | NP_006365.2 | STK25       |
| 222 | CL   | 3  | CID                             | 11.24 | 1 (K)G/T/A/L H\S\ s Q K P A E P V\K(R)                    | S7 =n                              | NP_006365.2 | STK25       |
| 223 | CL   | 2  | CID                             | 13.11 | 1 (K)L A D/F/G V A G Q/L T D\t Q I K(R)                   | T13 =n                             | NP_006365.2 | STK25       |
| 224 | CG   | 3  | CID                             | 17.16 | 1 (E)I/A/t P/P/P P/P/P/P K/K E(T)                         | T3 =n                              | NP_006810.1 | STIP1       |
| 225 | CG   | 2  | CID                             | 17.81 | 1 (E)D/L/K/A\D E P S S E E s D\L\E(I)                     | S12 =n                             | NP_003923.2 | ST13        |
| 226 | CG   | 2  | CID                             | 12.92 | 2 (E)D/L K/A D E P/S\ s E E s D\L\E(I)                    | S9 =n,S12 =n                       | NP_003923.2 | ST13        |
| 227 | CG   | 3  | CID                             | 17.14 | 2 (E)D/L/K/A/D E P S\ s\E E s D L E I D\K\E(G)            | S9 =n,S12 =n                       | NP_003923.2 | ST13        |
| 228 | CL   | 2  | CID                             | 20.68 | 1 (K)A/D E/P/S/S E/E s/D/L/E I D K(E)                     | S9 =n                              | NP_003923.2 | ST13        |
| 229 | AL   | 2  | CID                             | 14.77 | 2 (K)A D/E P/s S E\E/s/D/L/E I\D K(E)                     | S5 =n,S9 =n                        | NP_003923.2 | ST13        |
| 230 | EL   | 2  | ETD                             | 11.85 | 2 (K)A/D/E/P/S/s/E E/s/D/L\E\I\D\K(E)                     | S6 =n,S9 =n                        | NP_003923.2 | ST13        |
| 231 | CL   | 2  | CID                             | 11.84 | 3 (K)A D E P/s s E E s/D/L/E I D K(E)                     | S5 =n,S6 =n,S9 =n                  | NP_003923.2 | ST13        |
| 232 | AL   | 2  | CID                             | 11.63 | 2 (K)A D/E/P/S/s E\E/s D/L/E I D K(E)                     | S6 =n,S9 =n                        | NP_003923.2 | ST13        |
| 233 | AL   | 3  | CID                             | 20.17 | 3 (K)K V/E E D L\K\A D E P/s s/E E/s D/L/E/I D K(E)       | S12 =n,S13 =n,S16 =n               | NP_003923.2 | ST13        |
| 234 | ELX  | 3  | ETD                             | 15.45 | 1 (K)S/S/S/R Q L\ s E S\F\K(S)                            | S7 =k                              | NP_003137.1 | SSRP1       |
| 235 | AL   | 4  | ETD                             | 22.29 | 1 (K)F A s D D E H D E H D E N G A T G P V\K(R)           | S3 =k                              | NP_003133.1 | SSB         |
| 236 | CL   | 3  | CID                             | 16.27 | 1 (K)F A/s/D/D/E H/D/E H/D E N G A T G P V\K(R)           | S3 =k                              | NP_003133.1 | SSB         |
| 237 | CT   | 3  | CID                             | 20.67 | 1 (K)F A/s/D D/E\H/D/E/H D/E N G A T/G P V\K R(A)         | S3 =k                              | NP_003133.1 | SSB         |
| 238 | ET   | 4  | ETD                             | 17.76 | 1 (K)F A s D D E\H D E H D E N G A T G P V\K R(A)         | S3 =k                              | NP_003133.1 | SSB         |
| 239 | AL   | 4  | ETD                             | 20.95 | 1 (K)T/K F A\ s D D E H\D\E H\D\E N\G\A T G P V\K(R)      | S5 =k,T1 =nf                       | NP_003133.1 | SSB         |
| 240 | AL   | 3  | CID                             | 14.26 | 1 (K)T K/F A s/D D/E H/D E/H/D E\N G A T G P V\K(R)       | S5 =k,T1 =nf                       | NP_003133.1 | SSB         |
| 241 | ET   | 4  | ETD                             | 12.49 | 1 (K)T/K F A s\D\D/E/H D/E H D E N\G A T G P V\K R(A)     | S5 =k,T1 =nf                       | NP_003133.1 | SSB         |
| 242 | CG   | 2  | CID                             | 15.45 | 1 (E)F S/A/S/P/m L K S/G m\ s\ P E(Q)                     | S12 =k,S4 =nf                      | NP_057417.2 | SRRM2       |
| 243 | CG   | 3  | CID                             | 14.67 | 1 (E)G D A/P/F/S/E P/G T T S T Q R P S\ s/P E(T)          | S18 =k                             | NP_057417.2 | SRRM2       |
| 244 | CT   | 3  | CID                             | 17.44 | 2 (K)A G m/S/S N Q/S I S s/P/V L/D/A V/P/R/t/P S R(E)     | S11 =k,T20 =n,S4 =nf               | NP_057417.2 | SRRM2       |
| 245 | CT   | 3  | CID                             | 13.39 | 3 (K)A G m s s N Q\ S I/s S/P/V/L/D/A V/P/R/t/P S R(E)    | S5 =n,S10 =n,T20 =n,S4 =nf,S11 =nf | NP_057417.2 | SRRM2       |
| 246 | CT   | 3  | CID                             | 9.56  | 2 (K)A G m/s S N Q\ S I S/S/P/V L D A V/P R T P\ s R(E)   | S4 =k,S22 =n,S11 =nf               | NP_057417.2 | SRRM2       |
| 247 | CT   | 3  | CID                             | 8.54  | 3 (K)A G m s s N Q\ S I/S s/P/V L/D/A V/P/R t/P S R(E)    | S5 =n,S11 =k,T20 =n,S4 =nf         | NP_057417.2 | SRRM2       |
| 248 | CT   | 4  | CID                             | 8.99  | 2 (K)A G m s S N Q\ S I/S P V L D/A V P R\ t P/s R E R(S) | T20 =n,S22 =n,S4 =nf,S11 =nf       | NP_057417.2 | SRRM2       |
| 249 | ELX  | 4  | ETD                             | 9.52  | 4 (K)A/L P Q t P R P/R s R s P\ S\ s P\E L N N\K(C)       | T5 =n,S10 =n,S12 =k,S15 =k,S14 =nf | NP_057417.2 | SRRM2       |
| 250 | ELX  | 4  | ETD                             | 8.44  | 4 (K)A/L P Q t P/R P R S R/s P s\ s P\E L N N\K(C)        | T5 =n,S12 =k,S14 =k,S15 =k         | NP_057417.2 | SRRM2       |
| 251 | ELX  | 4  | ETD                             | 20.21 | 4 (K)A P/A P R A L P R R s R s\G\ s s S\K(G)              | S11 =n,S13 =n,S15 =n,S16 =n        | NP_057417.2 | SRRM2       |
| 252 | CT   | 3  | CID                             | 15.7  | 2 (K)A Q/t P/P/G P S/L/s G S K\ S/P C/P Q E\K(S)          | T3 =k,S10 =n                       | NP_057417.2 | SRRM2       |



| #   | Exp. | CS | Number of phosphorylation sites |       |   | Sequence with fragments                                                 | Literature lookup                                                     | RefSeq#     | Gene Symbol |
|-----|------|----|---------------------------------|-------|---|-------------------------------------------------------------------------|-----------------------------------------------------------------------|-------------|-------------|
|     |      |    | Mode                            | Score | ▼ |                                                                         |                                                                       |             |             |
| 253 | ELX  | 4  | ETD                             | 10.66 | 4 | (K)D/K P R A A P R A Q s G s D\s s P E P\K(A)                           | S11 =k,S13 =k,S15 =n,S16 =k                                           | NP_057417.2 | SRRM2       |
| 254 | ELX  | 4  | ETD                             | 24.1  | 2 | (K)D/T/L R/t P P R E R\S\G A G S s P E T\K(E)                           | T5 =n,S16 =k,S11 =nf                                                  | NP_057417.2 | SRRM2       |
| 255 | ELX  | 4  | ETD                             | 19.47 | 1 | (K)D/T/L R T\p P R E R S G A/G S s P\E T\K(E)                           | S16 =k,S11 =nf                                                        | NP_057417.2 | SRRM2       |
| 256 | EL   | 4  | ETD                             | 18.34 | 2 | (K)D/T L/R t P P R E R\S\G A G/s S P\E T\K(E)                           | T5 =n,S15 =n,S11 =nf,S16 =nf                                          | NP_057417.2 | SRRM2       |
| 257 | ELX  | 4  | ETD                             | 16.2  | 3 | (K)D T L R\t P P R E R\S G\A G s s P\E T\K(E)                           | T5 =n,S15 =n,S16 =k,S11 =nf                                           | NP_057417.2 | SRRM2       |
| 258 | AL   | 4  | ETD                             | 13.35 | 2 | (K)D t L R/T P P R E R\S G A G/S\s/P/E T\K(E)                           | T2 =n,S16 =k,S11 =nf                                                  | NP_057417.2 | SRRM2       |
| 259 | CT   | 3  | CID                             | 14.7  | 2 | (K)E L/S N s/P/L/R/E N/S/F/G/S/P L/E/F R(N)                             | S5 =k,S14 =k,S11 =nf                                                  | NP_057417.2 | SRRM2       |
| 260 | ET   | 3  | ETD                             | 11.92 | 3 | (K)G/G/R s R s\S S P/V t E L/A\S\R(S)                                   | S4 =n,S6 =n,T11 =n,S8 =nf<br>S4 =n,S6 =n,S15 =n,S17 =n,S8 =nf,S29 =nf | NP_057417.2 | SRRM2       |
| 261 | ELX  | 5  | ETD                             | 10.22 | 4 | (K)G G R s R\s/S S P V\T E L A/s R s/P I R/Q D R\G\E F S\A S P m L\K(S) | =nf                                                                   | NP_057417.2 | SRRM2       |
| 262 | ELX  | 5  | ETD                             | 26.85 | 1 | (K)G Q S Q/t S P D H\R\S D T S\S\P\E V R Q/S H S E/S P S\L Q\S\K(S)     | =nf                                                                   | NP_057417.2 | SRRM2       |
| 263 | ELX  | 5  | ETD                             | 21.25 | 1 | (K)G Q S Q/T S\P/D H R/s D/T\S S S P E V R\Q S H S E\S P S\L Q\S\K(S)   | S11 =k,S15 =nf,S21 =nf,S25 =nf                                        | NP_057417.2 | SRRM2       |
| 264 | ELX  | 5  | ETD                             | 19.98 | 1 | (K)G Q/S Q\T\S P/D H R/S D T\S/s P\E V R Q/S H/S\E S P\S\L Q\S\K(S)     | S15 =k,S11 =nf,S21 =nf,S25 =nf                                        | NP_057417.2 | SRRM2       |
| 265 | ELX  | 5  | ETD                             | 16.12 | 1 | (K)G/Q/S/Q T\S P/D H/R S D\t\S S S P E/V R\Q S H/S\E S P S\L Q\S\K(S)   | =nf                                                                   | NP_057417.2 | SRRM2       |
| 266 | ELX  | 5  | ETD                             | 12.23 | 1 | (K)G Q/S Q/T\S P D H\R S D\T S S P E/V R\Q S H S E\S P\S\L Q\S\K(S)     | =nf                                                                   | NP_057417.2 | SRRM2       |
| 267 | EL   | 4  | ETD                             | 10.2  | 2 | (K)G R G P/S P E/G S\S S T/E s s P E H P P K(S)                         | S14 =n,S15 =n                                                         | NP_057417.2 | SRRM2       |
| 268 | ELX  | 4  | ETD                             | 7.14  | 3 | (K)S/P/E K\L/P Q s S S s\E S S P/P S P Q/P/t K(V)                       | S8 =n,S11 =n,T21 =n,S17 =nf                                           | NP_057417.2 | SRRM2       |
| 269 | ELX  | 4  | ETD                             | 19.24 | 4 | (K)S/R I S S R\R\s R s L/s s P R\S\K(A)                                 | S8 =n,S10 =n,S12 =n,S13 =n                                            | NP_057417.2 | SRRM2       |
| 270 | ELX  | 4  | ETD                             | 18.17 | 3 | (K)S/R I S S/R R s R s L S s P R S\K(A)                                 | S8 =n,S10 =n,S13 =n                                                   | NP_057417.2 | SRRM2       |
| 271 | ELX  | 4  | ETD                             | 13.93 | 4 | (K)S/R I s S R R\s R s L S s P R\S\K(A)                                 | S4 =n,S8 =n,S10 =n,S13 =n                                             | NP_057417.2 | SRRM2       |
| 272 | ELX  | 4  | ETD                             | 16.66 | 4 | (K)S/R/L/s L R R\s L s\G S s P\C P\K(Q)                                 | S4 =n,S8 =k,S10 =k,S13 =k,S12 =nf                                     | NP_057417.2 | SRRM2       |
| 273 | ELX  | 4  | ETD                             | 19.48 | 3 | (K)S/R L s/P R R s R S G\S s P E\V\K(D)                                 | S4 =n,S8 =n,S13 =k,S10 =nf,S12 =nf                                    | NP_057417.2 | SRRM2       |
| 274 | ELX  | 4  | ETD                             | 15.11 | 4 | (K)S/R L s P R R s\R\S\G s s P E\V\K(D)                                 | S4 =n,S8 =n,S12 =k,S13 =k,S10 =nf                                     | NP_057417.2 | SRRM2       |
| 275 | ELX  | 4  | ETD                             | 14.36 | 2 | (K)S/R L s/P\R R S\R S G S s P\E\V\K(D)                                 | S4 =n,S13 =k,S10 =nf,S12 =nf                                          | NP_057417.2 | SRRM2       |
| 276 | ELX  | 4  | ETD                             | 12.74 | 4 | (K)S R L s P R R\s\R s G S s P\E V\K(D)                                 | S4 =n,S8 =n,S10 =k,S13 =k,S12 =nf                                     | NP_057417.2 | SRRM2       |
| 277 | ELX  | 5  | ETD                             | 22.09 | 4 | (K)s R/t/P/P R R/R s S R/S s P\E L T R\K(A)                             | S1 =n,T3 =n,S9 =n,S13 =n                                              | NP_057417.2 | SRRM2       |
| 278 | ELX  | 5  | ETD                             | 19.3  | 4 | (K)s R/t P P R R R s S R S s P\E L T R\K(A)                             | S1 =n,T3 =n,S10 =n,S13 =n                                             | NP_057417.2 | SRRM2       |
| 279 | EL   | 5  | ETD                             | 14.9  | 3 | (K)S R/t P P R R R\s R S s P\E L T R\K(A)                               | T3 =n,S9 =n,S13 =n                                                    | NP_057417.2 | SRRM2       |
| 280 | EL   | 5  | ETD                             | 14.39 | 3 | (K)S/R\t P P R R R s S S s P E\L T R\K(A)                               | T3 =n,S10 =n,S13 =n                                                   | NP_057417.2 | SRRM2       |
| 281 | ELX  | 4  | ETD                             | 11.93 | 4 | (K)S R t/P P R R R s/s R/S/s P\E L T R\K(A)                             | T3 =n,S9 =n,S10 =n,S13 =n                                             | NP_057417.2 | SRRM2       |
| 282 | ELX  | 4  | ETD                             | 10.98 | 4 | (K)S R t P P R R R s/S R s/s P\E L T R\K(A)                             | T3 =n,S9 =n,S12 =n,S13 =n                                             | NP_057417.2 | SRRM2       |
| 283 | ELX  | 4  | ETD                             | 9.08  | 4 | (K)s R t\p/P R R/R S/s R s s P\E L T R\K(A)                             | S1 =n,T3 =n,S10 =n,S12 =n                                             | NP_057417.2 | SRRM2       |
| 284 | EL   | 5  | ETD                             | 7.48  | 3 | (K)S R\t P P R R/R\S/S R\s s P E\ T\R\K(A)                              | T3 =n,S12 =n,S13 =n                                                   | NP_057417.2 | SRRM2       |
| 285 | ET   | 4  | ETD                             | 16.24 | 3 | (K)S/R\t P/S R H\s\C S G S s P P\R(V)                                   | T3 =n,S8 =n,S13 =n                                                    | NP_057417.2 | SRRM2       |
| 286 | ELX  | 4  | ETD                             | 20.52 | 3 | (K)S/R t P S R H\s\C S\G S s P P R V\K(S)                               | T3 =n,S8 =n,S13 =n                                                    | NP_057417.2 | SRRM2       |
| 287 | ELX  | 4  | ETD                             | 17.45 | 2 | (K)S/R T P s R H/S\C S\G S s P P\R\ V\K(S)                              | S5 =n,S13 =n                                                          | NP_057417.2 | SRRM2       |

| #   | Exp. | CS | Number of phosphorylation sites |       |   | Sequence with fragments                                       | Literature lookup                   | RefSeq#     | Gene Symbol |
|-----|------|----|---------------------------------|-------|---|---------------------------------------------------------------|-------------------------------------|-------------|-------------|
|     |      |    | Mode                            | Score | ▼ |                                                               |                                     |             |             |
| 288 | ELX  | 4  | ETD                             | 14.52 | 2 | (K)S/R t P/S R/H\S\C S\G S s P P\R\V\K(S)                     | T3 =n,S13 =n                        | NP_057417.2 | SRRM2       |
| 289 | ELX  | 4  | ETD                             | 12.2  | 2 | (K)S/R t P/S R H S\C S\G s S P P R V\K(S)                     | T3 =n,S12 =n                        | NP_057417.2 | SRRM2       |
| 290 | ELX  | 4  | ETD                             | 10.28 | 3 | (K)s R/T P/S R H\s C S\G S s P P R\V\K(S)                     | S1 =n,S8 =n,S13 =n                  | NP_057417.2 | SRRM2       |
| 291 | ET   | 3  | ETD                             | 21.73 | 2 | (K)T/H T T A L A\G R\s P\s P A S G\R(R)                       | S10 =k,S12 =k                       | NP_057417.2 | SRRM2       |
| 292 | ELX  | 4  | ETD                             | 14.75 | 4 | (K)T R t P L R\Q\R\S R s G s s P E V D S\K(S)                 | T3 =n,S11 =k,S13 =k,S14 =k          | NP_057417.2 | SRRM2       |
| 293 | ELX  | 4  | ETD                             | 28.85 | 2 | (K)V/K P E t P\P R Q S H S G S I s P Y P\K(V)                 | T5 =n,S16 =k,S10 =nf                | NP_057417.2 | SRRM2       |
| 294 | ELX  | 4  | ETD                             | 15.1  | 2 | (K)V/K P/E t P\P R\Q\S H S G S I s P y P\K(V)                 | T5 =n,Y18 =n,S10 =nf,S16 =nf        | NP_057417.2 | SRRM2       |
| 295 | AL   | 3  | CID                             | 8.91  | 2 | (K)V/K P E T P P R Q S H S G S I\s P y P K(V)                 | S16 =k,Y18 =n,S10 =nf               | NP_057417.2 | SRRM2       |
| 296 | ET   | 4  | ETD                             | 7.46  | 3 | (K)V/K P E/t/P P R Q s H\S G S I\s P\Y P\K(V)                 | T5 =n,S10 =k,S16 =k                 | NP_057417.2 | SRRM2       |
| 297 | AT   | 3  | ETD                             | 7.33  | 2 | (R)A R s R t P S A P S Q S R(M)                               | T5 =k, S3 =n                        | NP_057417   | SRRM2       |
| 298 | CT   | 2  | CID                             | 9.68  | 1 | (R)G E/F S A s/P m L K(S)                                     | S6 =k                               | NP_057417.2 | SRRM2       |
| 299 | CT   | 3  | CID                             | 15.18 | 1 | (R)G E G D/A/P/F/S E P G T T S T Q R/P S s/P E T A T K(Q)     | S20 =k                              | NP_057417.2 | SRRM2       |
| 300 | ET   | 4  | ETD                             | 16.48 | 3 | (R)G K R s L t R s P P A I\R(R)                               | S4 =k,T6 =k,S8 =k                   | NP_057417.2 | SRRM2       |
| 301 | ET   | 4  | ETD                             | 13.81 | 2 | (R)H/A s/S S P E/s\P K P\A P A\P G S\H\R(E)                   | S3 =n,S8 =n                         | NP_057417.2 | SRRM2       |
| 302 | CT   | 3  | CID                             | 23.44 | 2 | (R)H G G/s P Q P L A/T/T/P L S Q E P V N P/P/s E A S P T\R(D) | =nf,T27 =nf                         | NP_057417.2 | SRRM2       |
| 303 | CT   | 3  | CID                             | 16.53 | 2 | (R)H G G s P Q/P L\A T T P L S Q E/P V N P/P/S E A s P T\R(D) | =nf                                 | NP_057417.2 | SRRM2       |
| 304 | CT   | 4  | CID                             | 12.62 | 3 | (R)H G G S P Q P L A T/t P L S Q E\P\N N P P/S/E A s P T R(D) | T11 =k,S14 =k,S25 =k,S4 =nf,T27 =nf | NP_057417.2 | SRRM2       |
| 305 | CT   | 4  | CID                             | 11.52 | 2 | (R)H G G S P Q P/L A t T/P/L S Q/E P V/N/P/P/S/E A S P t R(D) | =nf,S25 =nf                         | NP_057417.2 | SRRM2       |
| 306 | ET   | 4  | ETD                             | 20.12 | 3 | (R)K/R s R s R s P L A I\R(R)                                 | S3 =n,S5 =k,S7 =n                   | NP_057417.2 | SRRM2       |
| 307 | CT   | 4  | CID                             | 16.28 | 1 | (R)R G E G D\A P F S E P/G/T T/S/T Q R P S s P E T A T K(Q)   | S21 =k                              | NP_057417.2 | SRRM2       |
| 308 | ET   | 4  | ETD                             | 14.62 | 3 | (R)R/R s R s R t P\L L P\R(K)                                 | S3 =n,S5 =k,T7 =n                   | NP_057417.2 | SRRM2       |
| 309 | ET   | 4  | ETD                             | 16.49 | 3 | (R)R/R s R s R t P\P A I\R(R)                                 | S3 =n,S5 =n,T7 =n                   | NP_057417.2 | SRRM2       |
| 310 | ET   | 3  | ETD                             | 12.2  | 3 | (R)R/s\R/s V s P\C S N V E S\R(L)                             | S2 =n,S4 =k,S6 =k                   | NP_057417.2 | SRRM2       |
| 311 | AT   | 5  | CID                             | 14.1  | 2 | (R)s D t S S P E V R\Q\S/H/S/E S\P/S/L Q S K S Q/T S P K(G)   | S1 =k,T3 =n,S5 =nf,S11 =nf,S15 =nf  | NP_057417.2 | SRRM2       |
| 312 | AT   | 3  | ETD                             | 11.07 | 3 | (R)s R s R t P L I S\R(R)                                     | S1 =n,S3 =n,T5 =k                   | NP_057417.2 | SRRM2       |
| 313 | ET   | 3  | ETD                             | 10.7  | 3 | (R)s/R s R t P L L P\R(K)                                     | S1 =n,S3 =k,T5 =k                   | NP_057417.2 | SRRM2       |
| 314 | ET   | 3  | ETD                             | 8.66  | 3 | (R)s/R s R t P P A I\R(R)                                     | S1 =n,S3 =n,T5 =n                   | NP_057417.2 | SRRM2       |
| 315 | ET   | 3  | ETD                             | 4.35  | 3 | (R)s/R\s R\ t P\P V T\R(R)                                    | S1 =n,S3 =n,T5 =k                   | NP_057417.2 | SRRM2       |
| 316 | CT   | 3  | CID*                            | 14.67 | 3 | (R)s R/s S s P V T E L A/S R(S)                               | S1 =n,S3 =n,S5 =k                   | NP_057417.2 | SRRM2       |
| 317 | ET   | 3  | ETD*                            | 12.99 | 3 | (R)s/R s s s P V T E L A\S\R(S)                               | S1 =n,S3 =n,S5 =k                   | NP_057417.2 | SRRM2       |
| 318 | CT   | 2  | CID                             | 20.04 | 1 | (R)T P A A A A/A/m/N\ A s/P R(T)                              | S12 =k                              | NP_057417.2 | SRRM2       |
| 319 | ELX  | 4  | ETD                             | 6.48  | 3 | (K)A A S P\s P Q S V R R V S/S/s/R S V S G/s P/E/P/A/A K(K)   | S5 =n,S15 =n,S21 =n                 | NP_005830.2 | SRRM1       |
| 320 | EL   | 3  | ETD                             | 13.8  | 1 | (K)E/K t\P E L P E P S\V\K(V)                                 | T3 =n                               | NP_005830.2 | SRRM1       |
| 321 | ELX  | 3  | ETD                             | 14.75 | 1 | (K)E T\E s\E\A\E\D N L\D\D\ E\K(H)                            | S4 =n                               | NP_005830.2 | SRRM1       |
| 322 | AL   | 4  | ETD                             | 19.5  | 2 | (K)G/S/s P S\R S T R E A R s\P Q P\N\K(R)                     | S3 =k,S13 =n,S7 =nf                 | NP_005830.2 | SRRM1       |

| #   | Exp. | CS | Number of phosphorylation sites |       | Sequence with fragments | Literature lookup                                           | RefSeq#              | Gene           |        |
|-----|------|----|---------------------------------|-------|-------------------------|-------------------------------------------------------------|----------------------|----------------|--------|
|     |      |    | Mode                            | Score |                         |                                                             |                      | ▼              | Symbol |
| 323 | ET   | 4  | ETD                             | 10.73 | 1                       | (K)H L R/E K\A L R\s\M\R K(A)                               | S9 =n                | NP_005830.2    | SRRM1  |
| 324 | EL   | 3  | ETD                             | 15.52 | 1                       | (K)K/E K\t P E\L P E P S V\K(V)                             | T4 =n                | NP_005830.2    | SRRM1  |
| 325 | CL   | 3  | CID                             | 12.43 | 1                       | (K)K/E K t P/E/L P/E P S\V\K(V)                             | T4 =n                | NP_005830.2    | SRRM1  |
| 326 | EL   | 3  | ETD                             | 17.09 | 1                       | (K)K/E T E s\E\A E\D N L D D L E\K(H)                       | S5 =n                | NP_005830.2    | SRRM1  |
| 327 | CT   | 3  | CID                             | 15.7  | 2                       | (K)K E/t E\s/E/A\E D N/L D/D\L E\K(H)                       | T3 =n,S5 =n          | NP_005830.2    | SRRM1  |
| 328 | ET   | 3  | ETD                             | 14.76 | 2                       | (K)K E t E\s E A\E D N L D D\L E\K(H)                       | T3 =n,S5 =n          | NP_005830.2    | SRRM1  |
| 329 | CL   | 3  | CID                             | 11.93 | 1                       | (K)K E T E\s E\A\E D N/L D/D L E\K(H)                       | S5 =n                | NP_005830.2    | SRRM1  |
| 330 | CL   | 3  | CID                             | 17.89 | 2                       | (K)K P P A P/P s P V\Q\S Q s/P S T N/W/S/P A\V P\V K(K)     | S7 =n,S13 =n         | NP_005830.2    | SRRM1  |
| 331 | EL   | 4  | ETD                             | 14.18 | 2                       | (K)K/P P A P P\S/P V Q s Q s P S T\N W S P\A V P V\K(K)     | S11 =n,S13 =n        | NP_005830.2    | SRRM1  |
| 332 | EL   | 4  | ETD                             | 26.87 | 2                       | (K)P/R K V/E L s E s E E D K G\G\K(M)                       | S7 =n,S9 =n          | NP_005830.2    | SRRM1  |
| 333 | AL   | 3  | CID                             | 16.39 | 2                       | (K)R R t\A s P P P P K(R)                                   | T3 =n,S5 =n          | NP_005830.2    | SRRM1  |
| 334 | ELX  | 3  | ETD                             | 7.52  | 2                       | (K)R/R t A s P P P P\K(R)                                   | T3 =n,S5 =n          | NP_005830.2    | SRRM1  |
| 335 | ELX  | 3  | ETD                             | 18.06 | 2                       | (K)S/R V s V s/P G R T S G\K(V)                             | S4 =n,S6 =n          | NP_005830.2    | SRRM1  |
| 336 | EL   | 4  | ETD                             | 8.46  | 3                       | (K)T/R R L s P s A s P/P\R\R(R(H)                           | S5 =n,S7 =n,S9 =n    | NP_005830.2    | SRRM1  |
| 337 | AL   | 3  | CID                             | 20.5  | 1                       | (K)V/P K P/E P I P/E P K E P s/P E K(N)                     | S14 =n               | NP_005830.2    | SRRM1  |
| 338 | EL   | 4  | ETD                             | 19.13 | 1                       | (K)V P/K P E P I\P E P K E P s P E\K(N)                     | S14 =n               | NP_005830.2    | SRRM1  |
| 339 | CL   | 4  | CID                             | 16.44 | 1                       | (K)V P K P E P I P/E P/K/E P/s P E K N S K(K)               | S14 =n               | NP_005830.2    | SRRM1  |
| 340 | EL   | 4  | ETD                             | 12.65 | 1                       | (K)V P\K P E P I P E P\K\E P s P E K N S K\K(E)             | S14 =n               | NP_005830.2    | SRRM1  |
| 341 | AT   | 2  | CID                             | 12.57 | 1                       | (R)A/P Q/T/S s S P P\P V\R(R)                               | S6 =n                | NP_005830.2    | SRRM1  |
| 342 | ET   | 3  | ETD                             | 7.35  | 2                       | (R)H/R P/s P\A\A\t P P P\K(T)                               | S4 =k,T8 =k          | NP_005830.2    | SRRM1  |
| 343 | AT   | 3  | ETD                             | 16.24 | 2                       | (R)K/V E L s E s E E D K G\G\K(M)                           | S5 =n,S7 =n          | NP_005830.2    | SRRM1  |
| 344 | ELX  | 3  | ETD                             | 9.94  | 1                       | (K)A G/D Q E E E\S C E F S S A L E y L\K(L)                 | Y17 =n               | NP_004590.2    | SREBF2 |
| 345 | AT   | 3  | CID                             | 20.4  | 1                       | (K)A P R s/P P V G S G P A\S/G V E P/T/S/F/P/V E S E A R(L) | S4 =n                | NP_001030312.1 | SRA1   |
| 346 | CG   | 3  | CID                             | 16.66 | 1                       | (E)s E G P S S L D P S Q E G/P T\G L K\E(A)                 | S1 =n                | NP_003891.1    | SQSTM1 |
| 347 | CG   | 2  | CID                             | 16.53 | 1                       | (E)S E/G P/s S/L/D P S/Q E G P T G L\K E(A)                 | S5 =n                | NP_003891.1    | SQSTM1 |
| 348 | EG   | 3  | ETD                             | 9.98  | 1                       | (E)S/E/G P S/s L D P\S\Q E G P T G L K\E(A)                 | S6 =n                | NP_003891.1    | SQSTM1 |
| 349 | EL   | 3  | ETD                             | 13.05 | 1                       | (K)R S R L t P V S P E S S S T E E\K(S)                     | T5 =k,S8 =nf         | NP_003891.1    | SQSTM1 |
| 350 | ET   | 4  | ETD                             | 18.52 | 2                       | (K)H R s s V/G P S/K P V S Q P R(R)                         | S3 =n,S4 =n          | NP_006708.1    | SPIN   |
| 351 | ET   | 4  | ETD                             | 21.51 | 1                       | (K)E V/E\K Q E D/T E\N/H/P/K t P E S A P E N\K(D)           | T14 =n               | NP_055816.2    | SPEN   |
| 352 | ET   | 4  | ETD                             | 17.17 | 2                       | (R)E/S G\V/V/A V s P E K/S E/s P\Q K E D G L\S S Q L\K(S)   | S8 =n,S14 =n         | NP_055816.2    | SPEN   |
| 353 | ELX  | 4  | ETD                             | 11.63 | 2                       | (K)F Q\E L S Q/P R s H T\s L\K(D)                           | S9 =n,S12 =n         | NP_003962.3    | SPAG9  |
| 354 | ELX  | 3  | ETD                             | 11.67 | 2                       | (K)K/R S s\t L\S Q\L P\G D\K(S)                             | S4 =n,T5 =n          | NP_003962.3    | SPAG9  |
| 355 | ELX  | 5  | ETD                             | 17.12 | 1                       | (K)E D D V I V/N K P/H\V\s\D E E E/E/E P P F/Y/H H/P F\K(L) | S13 =n               | NP_003094.4    | SON    |
| 356 | ET   | 4  | ETD                             | 9.44  | 1                       | (R)L Q/S\G K\E I/N t V K(L)                                 | T9 =n                | NP_055947.1    | SNX13  |
| 357 | ELX  | 4  | ETD                             | 16.89 | 2                       | (K)K/I P R G P P s P P A P/V m H S\P s R\K(M)               | S8 =k,S18 =n,S16 =nf | NP_036377.1    | SNW1   |

| #   | Exp. | CS | Number of phosphorylation sites |       | Sequence with fragments                                             | Literature lookup             | RefSeq#        | Gene Symbol |
|-----|------|----|---------------------------------|-------|---------------------------------------------------------------------|-------------------------------|----------------|-------------|
|     |      |    | Mode                            | Score |                                                                     |                               |                |             |
| 358 | ELX  | 4  | ETD                             | 10.63 | 2 (K)K/I P R   G P P / s P \ P A P / V M / H   S P s R \ K (M)      | S8 =k, S18 =n, S16 =nf        | NP_036377.1    | SNW1        |
| 359 | AT   | 3  | CID*                            | 11.9  | 2 (R)G/P/P/s/P/P/A/P V m H/s P S R(K)                               | S4 =k, S14 =k                 | NP_036377.1    | SNW1        |
| 360 | AT   | 3  | ETD*                            | 8.23  | 2 (R)G P P s P P I A P V m H s P   S I R (K)                        | S4 =k, S14 =k                 | NP_036377.1    | SNW1        |
| 361 | EL   | 4  | ETD                             | 12.57 | 1 (K)E/T/A R R R A m L D S\G/I\Y P P G\s P\G\K(-)                   | S18 =n                        | NP_036569.1    | SNAPAP      |
| 362 | EL   | 5  | ETD                             | 15.26 | 2 (K)N/E E P\V\R s P/E\R/R D R K A s\A N A R\K(R)                   | S7 =n, S16 =n                 | NP_003065.2    | SMARCC1     |
| 363 | EL   | 5  | ETD                             | 17.95 | 3 (K)R K H s\p s P P P P t P T E S\R K\K(S)                         | S4 =k, S6 =k, T11 =k          | NP_003065.2    | SMARCC1     |
| 364 | EL   | 4  | ETD                             | 8.41  | 3 (K)R/K H/s\p\s P P P P T P t E\S/R K\K(S)                         | S4 =k, S6 =k, T13 =n, T11 =nf | NP_003065.2    | SMARCC1     |
| 365 | EL   | 4  | ETD                             | 24.84 | 1 (K)R/R s Q K E E\D E Q\E D\L T\K(D)                               | S3 =n                         | NP_003065.2    | SMARCC1     |
| 366 | CL   | 2  | CID                             | 15.37 | 1 (K)D/G Q/D A I A Q s/P E K(E)                                     | S9 =n                         | NP_001013865.1 | SLTM        |
| 367 | AL   | 4  | CID                             | 14.04 | 2 (K)E N D N D S/G T\G\S t A\D T/S S/I/D/L N L/S I/S S/F L\s K(T)   | T11 =n, S28 =n                | NP_055535.2    | SLK         |
| 368 | AT   | 2  | CID                             | 14.89 | 1 (K)I/A A S S/s/F R(S)                                             | S6 =n                         | NP_003016.1    | SH3GL1      |
| 369 | ET   | 3  | ETD                             | 12.77 | 2 (R)G/s P H Y F/s P F R\p\Y(-)                                     | S2 =n, S7 =n                  | NP_003760.1    | SFRS9       |
| 370 | ET   | 3  | ETD                             | 12.07 | 1 (R)G s P H Y F\S/P\F R P\Y(-)                                     | S2 =n                         | NP_003760.1    | SFRS9       |
| 371 | EG   | 4  | ETD                             | 15.3  | 1 (E)K/N R/V K L D\D D s D D D E\E S K\E(G)                         | S10 =n                        | NP_004583.2    | SFRS8       |
| 372 | ET   | 3  | ETD                             | 15.24 | 2 (K)A R/s V/s P P P K R(A)                                         | S3 =k, S5 =k                  | NP_006266.2    | SFRS6       |
| 373 | CT   | 2  | CID                             | 14.4  | 1 (R)S N s P/L P V P/P S K(A)                                       | S3 =n, S1 =nf                 | NP_006266.2    | SFRS6       |
| 374 | CT   | 2  | CID                             | 15.76 | 1 (R)L I V\E N L S/s R(V)                                           | S8 =n                         | NP_005617.2    | SFRS4       |
| 375 | ET   | 2  | ETD                             | 4.9   | 1 (R)L/I/V/E/N/L S s\R(V)                                           | S8 =n                         | NP_005617.2    | SFRS4       |
| 376 | EL   | 3  | ETD                             | 16.94 | 2 (K)R/G s V/S R G R s Q E\K(S)                                     | S3 =n, S9 =n                  | NP_005617.2    | SFRS4       |
| 377 | ELX  | 5  | ETD                             | 12.77 | 2 (K)S E\S/S Q R E/G/R/G E\S E N\A G\T N\Q E t R S R S\R S N/s\K(S) | T21 =n, S29 =n                | NP_005617.2    | SFRS4       |
| 378 | EL   | 3  | ETD                             | 17.38 | 1 (K)S/K P N L P S E S R\S R s\K(S)                                 | S13 =n                        | NP_005617.2    | SFRS4       |
| 379 | EL   | 3  | ETD                             | 16.2  | 2 (K)S/K P N L P S E S R s R s\K(S)                                 | S11 =n, S13 =n                | NP_005617.2    | SFRS4       |
| 380 | ELX  | 5  | ETD                             | 6.95  | 1 (K)s R\S R/S\H S A/G/K S/R S K(S)                                 | S1 =n                         | NP_005617.2    | SFRS4       |
| 381 | ELX  | 4  | ETD                             | 18.52 | 3 (K)s R/s R s Q/E R R V E E\E\K(R)                                 | S1 =n, S3 =n, S5 =n           | NP_005617.2    | SFRS4       |
| 382 | ELX  | 5  | ETD                             | 12.79 | 1 (K)S R S R s R S G/S R/S R S K S R S R S Q S R S R S\K(K)         | S5 =n                         | NP_005617.2    | SFRS4       |
| 383 | EL   | 4  | ETD                             | 21.2  | 2 (K)K/R P Q s\p s/p R R E T\G\K(E)                                 | S5 =n, S7 =n                  | NP_004710.1    | SFRS2IP     |
| 384 | ELX  | 5  | ETD                             | 19.91 | 3 (K)R/D T T\R/E S/R/R/s\E s L s/P R\R\E\T\S/R\E\N\K(R)             | S10 =n, S12 =n, S14 =n        | NP_004710.1    | SFRS2IP     |
| 385 | ET   | 4  | ETD                             | 17.93 | 2 (K)R P H t P T P\G I Y m\G R P T Y G s\S\R(R)                     | T4 =n, S18 =n                 | NP_004584.1    | SFRS10      |
| 386 | AT   | 4  | ETD                             | 14.61 | 2 (K)R/P\H t P\T P/G I\Y\m\G R P T Y G\S s\R(R)                     | T4 =n, S19 =n                 | NP_004584.1    | SFRS10      |
| 387 | AT   | 4  | CID                             | 13.95 | 2 (K)R P H t/P/T P/G I/y/m G R P\T Y G S S R(R)                     | T4 =n, Y10 =n                 | NP_004584.1    | SFRS10      |
| 388 | ET   | 3  | ETD                             | 12.39 | 2 (R)R R\s P s P Y Y S\R(Y)                                         | S3 =k, S5 =k                  | NP_004584.1    | SFRS10      |
| 389 | ET   | 3  | ETD                             | 20.01 | 2 (K)V D/G P R/s P/s/Y/G R(S)                                       | S6 =n, S8 =n                  | NP_008855.1    | SFRS1       |
| 390 | ET   | 3  | ETD                             | 17.69 | 2 (R)V/K/V D G P R/s P s Y G\R(S)                                   | S8 =n, S10 =n                 | NP_008855.1    | SFRS1       |
| 391 | ET   | 4  | ETD                             | 11.79 | 3 (R)V K V D G P R s P s Y G R\S\R(S)                               | S8 =n, S10 =n, S14 =n         | NP_008855.1    | SFRS1       |
| 392 | AT   | 2  | CID                             | 14.75 | 1 (R)G m/G/P/G t/P/A/G Y/G R(G)                                     | T6 =n                         | NP_005057.1    | SFPQ        |

| #   | Exp. | CS | Number of phosphorylation sites |       | Sequence with fragments                                                   | Literature lookup     | RefSeq#        | Gene Symbol |
|-----|------|----|---------------------------------|-------|---------------------------------------------------------------------------|-----------------------|----------------|-------------|
|     |      |    | Mode                            | Score |                                                                           |                       |                |             |
| 393 | CG   | 2  | CID                             | 17.47 | 1 (E)A m D G S E t/P Q\L F T V L\p E(K)                                   | T7 =n                 | NP_006833.2    | SF3B2       |
| 394 | EG   | 4  | ETD                             | 11.42 | 1 (E)S/S/G/D/R E K\D S T R S/R G s/D S P A A D\V\E(I)                     | S15 =n                | NP_006833.2    | SF3B2       |
| 395 | ELX  | 4  | ETD                             | 22.96 | 3 (K)G/F/E E E H K D s D D s s\D D E Q E\K(K)                             | S9 =n,S13 =n,S14 =n   | NP_006833.2    | SF3B2       |
| 396 | ET   | 5  | ETD                             | 20.8  | 3 (K)G F/E/E E H K\D s D D\D\s s D\D E Q\E K\K P E A P K(L)               | S9 =n,S13 =n,S14 =n   | NP_006833.2    | SF3B2       |
| 397 | CT   | 3  | CID                             | 15.72 | 1 (K)I E/E A m/D G\s E T/P Q/L F/T\V L P E K(R)                           | S8 =n                 | NP_006833.2    | SF3B2       |
| 398 | ET   | 3  | ETD                             | 12.42 | 1 (K)I E/E A m D G S E t P Q L F T V L P\E K(R)                           | T10 =n                | NP_006833.2    | SF3B2       |
| 399 | AT   | 3  | CID                             | 17.25 | 1 (K)I E/E/A m/D/G S/E t/P Q L F/T V/L/P E/K R(T)                         | T10 =n                | NP_006833.2    | SF3B2       |
| 400 | ET   | 5  | ETD                             | 17.44 | 3 (K)K K G F/E/E E H K D s/D D D\s s D D E Q E K K P E A P\K(L)           | S11 =n,S15 =n,S16 =n  | NP_006833.2    | SF3B2       |
| 401 | EL   | 5  | ETD                             | 27.1  | 1 (K)K/K P/Q R V\R G/V s S E S S G D R E\K(D)                             | S10 =n                | NP_006833.2    | SF3B2       |
| 402 | ELX  | 4  | ETD                             | 6.06  | 1 (K)K P Q\R V R G/V s S/E/S S G/D/R E\K(D)                               | S9 =n                 | NP_006833.2    | SF3B2       |
| 403 | CL   | 3  | CID                             | 24.39 | 1 (K)A E E/P/P S/Q L D\Q D T Q V Q\D M/D E/G\s/D/D E E E G Q K(V)         | S21 =k                | NP_001005409.1 | SF3A1       |
| 404 | EL   | 4  | ETD                             | 16.29 | 1 (K)F/G/E S E E V E\m E V E/s D/E/E D D K Q E\K(A)                       | S13 =n                | NP_001005409.1 | SF3A1       |
| 405 | CL   | 4  | CID                             | 15.14 | 1 (K)F G E S/E\E V E m/E V/E/s D/E E D D/K Q E K(A)                       | S13 =n                | NP_001005409.1 | SF3A1       |
| 406 | CL   | 4  | CID                             | 18.64 | 2 (K)L R/T G D\L G\I P/P N P/E D/R s/P/s P E P I Y N S E G K(R)           | S16 =k,S18 =k         | NP_004621.2    | SF1         |
| 407 | CL   | 4  | CID                             | 16.77 | 2 (K)L R T G D\L G\I P/P N P/E D/R s/P/S P E P I Y N S E G K(R)           | S16 =k,Y23 =n,S18 =nf | NP_004621.2    | SF1         |
| 408 | ELX  | 4  | ETD                             | 15.18 | 2 (K)L/R T/G/D/L G I P P/N P E\D R/s P s P\E P\I Y N S E\G\K(R)           | S16 =k,S18 =k         | NP_004621.2    | SF1         |
| 409 | EL   | 4  | ETD                             | 16.05 | 1 (K)R/K R s R\W/N Q D T M E Q\K(T)                                       | S4 =k                 | NP_004621.2    | SF1         |
| 410 | CT   | 2  | CID                             | 12.43 | 2 (R)s P/s P E P I Y/N/S E G K(R)                                         | S1 =k,S3 =k           | NP_004621.2    | SF1         |
| 411 | CT   | 3  | CID                             | 19    | 2 (R)T G D L/G I P/P N/P E D R s/P/s/P E/P I Y N S E G K(R)               | S14 =k,S16 =k         | NP_004621.2    | SF1         |
| 412 | ET   | 4  | ETD                             | 11.77 | 2 (R)T/G/D/L G I P P N P E D R s/P s P\E P\I Y N S E\G\K(R)               | S14 =k,S16 =k         | NP_004621.2    | SF1         |
| 413 | EL   | 5  | ETD                             | 8.58  | 2 (K)S t/N\m\A\S\V D K G E s/A P/V\R K(N)                                 | T2 =n,S12 =n          | NP_036564.2    | SETDB1      |
| 414 | CT   | 3  | CID                             | 11.26 | 1 (K)E L/N/S/N H D G A/D E/t S E K(E)                                     | T12 =n,S13 =nf        | NP_003002.1    | SET         |
| 415 | CT   | 3  | CID                             | 16.98 | 1 (K)S/T/L s S/m G M S/D\A F S Q S K A\D F S\G m s S\A R(N)               | S4 =n                 | NP_005015.1    | SERPINB10   |
| 416 | ELX  | 5  | ETD                             | 7.03  | 1 (K)D R K N P\L P P s/V G/V V/D K(K)                                     | S9 =n                 | AAH26916.1     | SERBP1      |
| 417 | ELX  | 5  | ETD                             | 8.46  | 1 (K)E/A G G/G G/V/G G/P G\A K S/A A/Q A A A/Q t N S N A A G K Q L\R K(E) | T22 =n                | AAH26916.1     | SERBP1      |
| 418 | ELX  | 4  | ETD                             | 28.59 | 1 (K)R/E F D R H s\G\S D R S G\L\K(H)                                     | S7 =n                 | NP_001018078.1 | SERBP1      |
| 419 | ELX  | 5  | ETD                             | 30.27 | 1 (K)R/E F D R H S G S D R S s\F/S H Y S G\L\K(H)                         | S13 =n                | AAH26916.1     | SERBP1      |
| 420 | ELX  | 4  | ETD                             | 20.5  | 2 (K)R/E F D R H s\G S D R S s/F S/H/Y S G L\K(H)                         | S7 =n,S13 =n          | AAH26916.1     | SERBP1      |
| 421 | ELX  | 3  | ETD                             | 19.17 | 1 (K)R/G G S G s H\N W G T V\K(D)                                         | S6 =n                 | AAH26916.1     | SERBP1      |
| 422 | ELX  | 4  | ETD                             | 24.84 | 1 (K)R/G G S\G S\H N W\G T V K D E L T\E s P K(Y)                         | S19 =n                | AAH26916.1     | SERBP1      |
| 423 | ELX  | 5  | ETD                             | 28.43 | 1 (K)S/K s E E A H A E D\S V m D H H F R\K(P)                             | S3 =n                 | AAH26916.1     | SERBP1      |
| 424 | ELX  | 5  | ETD                             | 26.18 | 1 (K)S K s E E A H A E D\S V M D H H F R\K(P)                             | S3 =n                 | AAH26916.1     | SERBP1      |
| 425 | ELX  | 4  | ETD                             | 13.13 | 1 (K)s K S E/E\A H A E D\S V m D H H\F\R\K(P)                             | S1 =n                 | AAH26916.1     | SERBP1      |
| 426 | ET   | 3  | ETD                             | 10.52 | 1 (R)E/K y R K L L E R L\K(E)                                             | Y3 =n                 | NP_067640.2    | SENP2       |
| 427 | ELX  | 3  | ETD                             | 7.12  | 2 (K)A/V/A A R A A G s t V/R Q R\K(N)                                     | S9 =n,T10 =n          | NP_006799.1    | SEC61B      |

| #   | Exp. | Number of phosphorylation sites |      |       | Sequence with fragments                                           | Literature lookup           | RefSeq#        | Gene Symbol |
|-----|------|---------------------------------|------|-------|-------------------------------------------------------------------|-----------------------------|----------------|-------------|
|     |      | CS                              | Mode | Score |                                                                   |                             |                |             |
| 428 | ELX  | 3                               | ETD  | 20.48 | 1 (M)P/G P T P S G/T N V G S S G R S P s\K(A)                     | S18 =n,S16 =nf              | NP_006799.1    | SEC61B      |
| 429 | ELX  | 3                               | ETD  | 20.07 | 2 (M)P/G P/T/P S G T N V G S S G R s P s\K(A)                     | S16 =k,S18 =n               | NP_006799.1    | SEC61B      |
| 430 | ELX  | 3                               | ETD  | 20.05 | 1 (M)P/G P/T P S G T N V G S S G R/s P\s\K(A)                     | S16 =k                      | NP_006799.1    | SEC61B      |
| 431 | EL   | 5                               | ETD  | 15.51 | 4 (E)R/S/M/N P N\ V\s/m V s s A/s S P S\S/S R/T P(Q)              | S8 =n,S11 =n,S12 =n,S14 =n  | NP_056080.1    | SATB2       |
| 432 | EL   | 4                               | ETD  | 8.87  | 1 (K)V A/R L E/Q N/G\s P/m G/A R\G R P N G A\ V\A\K(A)            | S9 =n                       | NP_056080.1    | SATB2       |
| 433 | CT   | 2                               | CID  | 15.27 | 1 (K)V/T/P/D I E E/s/L/L/E P E/N E K(I)                           | S8 =k                       | NP_055464.1    | SAFB2       |
| 434 | EL   | 3                               | ETD  | 11.16 | 2 (K)s G s R/G T E R T V M D\K(S)                                 | S1 =n,S3 =n                 | NP_002958.2    | SAFB        |
| 435 | ELX  | 5                               | ETD  | 8.23  | 1 (K)Q G\ V\ L\ T\ H\ G R V R\ L\ L\ S K(G)                       | S14 =n                      | NP_001001.2    | RPS6        |
| 436 | ELX  | 4                               | ETD  | 20.05 | 3 (K)R/R R L s\s L R A s T S\K(S)                                 | S5 =k,S6 =k,S10 =k,S12 =nf  | NP_001001.2    | RPS6        |
| 437 | EL   | 4                               | ETD  | 15.83 | 2 (K)R/R R L s s L R A S T S\K(S)                                 | S5 =k,S6 =k,S10 =nf,S12 =nf | NP_001001.2    | RPS6        |
| 438 | AT   | 3                               | ETD  | 14.56 | 2 (R)L/s S L R A s T S\K(S)                                       | S2 =k,S7 =k,S3 =nf,S9 =nf   | NP_001001.2    | RPS6        |
| 439 | AT   | 3                               | ETD  | 19.67 | 3 (R)R/L s s L R A s T S\K(S)                                     | S3 =k,S4 =k,S8 =k,S10 =nf   | NP_001001.2    | RPS6        |
| 440 | AT   | 3                               | ETD  | 14.21 | 2 (R)R/L S s L R A s T S\K(S)                                     | S4 =k,S8 =k,S3 =nf,S10 =nf  | NP_001001.2    | RPS6        |
| 441 | ET   | 4                               | ETD  | 29.3  | 4 (R)R/L/s s L R A/s T S K s E S S Q\K(-)                         | =nf,S15 =nf                 | NP_001001.2    | RPS6        |
| 442 | ET   | 4                               | ETD  | 28.57 | 3 (R)R L s s L R A s T S K S E S S Q\K(-)                         | =nf,S15 =nf                 | NP_001001.2    | RPS6        |
| 443 | ET   | 3                               | ETD  | 6.17  | 3 (R)R/R L s s L R/A s\T/S\K(S)                                   | S4 =k,S5 =k,S9 =k,S11 =nf   | NP_001001.2    | RPS6        |
| 444 | CT   | 2                               | CID  | 17.39 | 1 (K)D/E I L P T t P I/S E Q K(G)                                 | T7 =k                       | NP_000996.2    | RPS3        |
| 445 | AT   | 3                               | CID  | 15.49 | 1 (K)D/T/G K t P V/E P/E/V/A/I/H\R(I)                             | T5 =n                       | NP_001014.1    | RPS20       |
| 446 | CL   | 3                               | CID  | 16.82 | 1 (K)T H/t R V S V/Q R T Q A P A\ V\A\T\T(-)                      | T3 =n                       | NP_002943.2    | RPS2        |
| 447 | ELX  | 4                               | ETD  | 20.34 | 1 (K)I/G/R I E D V\T P I/P/S D\S t R R\K(G)                       | T15 =n                      | NP_001020241.1 | RPS14       |
| 448 | CL   | 3                               | CID  | 15.22 | 1 (K)K/P/R P s E G\ D E D C L P A S K(K)                          | S5 =n                       | NP_006404.1    | RPP30       |
| 449 | EL   | 3                               | ETD  | 13.41 | 1 (K)K P R P s E G D E D\C L P\A\S\K(K)                           | S5 =n                       | NP_006404.1    | RPP30       |
| 450 | EL   | 4                               | ETD  | 19.83 | 1 (K)K P R P s/E G D E D\C L P A\S K\K(A)                         | S5 =n                       | NP_006404.1    | RPP30       |
| 451 | CL   | 4                               | CID  | 16.22 | 1 (K)K P R/P s E/G D E D C L P A S K K(A)                         | S5 =n                       | NP_006404.1    | RPP30       |
| 452 | ELX  | 4                               | ETD  | 7.64  | 1 (K)D/A L/D P/R Q P G\Y Q P\ N\ P H P G P\S/s P P\A A P/A S\K(R) | S21 =n                      | NP_060263.1    | RPP25       |
| 453 | AT   | 2                               | CID  | 16.82 | 2 (K)K E E s E/E s D D m G F\G\L F\D(-)                           | S4 =k,S7 =k                 | NP_000994.1    | RPLP1       |
| 454 | AT   | 2                               | CID  | 14.82 | 1 (K)K E E S E\ E s\D D m G F\G L\F\D(-)                          | S7 =k,S4 =nf                | NP_000994.1    | RPLP1       |
| 455 | EL   | 2                               | ETD  | 13.11 | 1 (K)K/E/E s\ E E S\D\D\D m\G\F\G\L F\D(-)                        | S4 =k,S7 =nf                | NP_000994.1    | RPLP1       |
| 456 | EL   | 2                               | ETD  | 12.43 | 2 (K)K/E E s E E s\ D D D\M\G\F\G\L\F\D(-)                        | S4 =k,S7 =k                 | NP_000994.1    | RPLP2       |
| 457 | EL   | 2                               | ETD  | 11.52 | 2 (K)K/E E s E E s\ D D D\M\G\F\G\L\F\D(-)                        | S4 =k,S7 =k                 | NP_000994.1    | RPLP1       |
| 458 | EL   | 2                               | ETD  | 11.29 | 1 (K)K/E E S E\ E s\D\D\D\M\G\F\G\L F\D(-)                        | S7 =k,S4 =nf                | NP_000994.1    | RPLP2       |
| 459 | ET   | 2                               | ETD  | 11.19 | 2 (K)K/E E s E E s\ D D D\M\G\F\G\L\F\D(-)                        | S4 =k,S7 =k                 | NP_000994.1    | RPLP1       |
| 460 | EL   | 4                               | ETD  | 12.45 | 2 (K)K/V E A K K E E s E E s\ D D D\M G\F\G L\F\D(-)              | S9 =k,S12 =k                | NP_000994.1    | RPLP1       |
| 461 | EL   | 3                               | ETD  | 14.82 | 1 (K)K A s F\ L R A Q E R\ A\ A\E\S(-)                            | S3 =n                       | NP_000960.2    | RPL5        |
| 462 | ELX  | 3                               | ETD  | 9.65  | 1 (K)A M/s A R A E A\ I\K(I)                                      | S3 =n                       | NP_000983.1    | RPL29       |

| #   | Exp. | CS | Number of phosphorylation sites |       | Sequence with fragments                                                     | Literature lookup         | RefSeq#        | Gene Symbol |
|-----|------|----|---------------------------------|-------|-----------------------------------------------------------------------------|---------------------------|----------------|-------------|
|     |      |    | Mode                            | Score |                                                                             |                           |                |             |
| 463 | ELX  | 3  | ETD                             | 18.26 | 1 (K)A/Q/A A A P A s V/P A Q A P\K(G)                                       | S8 =n                     | NP_000983.1    | RPL29       |
| 464 | ELX  | 3  | ETD                             | 9.09  | 2 (K)F/Q R A I t G/A/s L/A D I\m A\K(R)                                     | T6 =n,S9 =n               | NP_000977.1    | RPL24       |
| 465 | EL   | 3  | ETD                             | 10.4  | 2 (K)R/R s/P/s/P K/P\T\K(V)                                                 | S3 =k,S5 =k               | NP_006702.1    | RNPS1       |
| 466 | CL   | 3  | CID                             | 17.86 | 2 (K)A A y G D L S s E E E\E E N/E P E/S L G\V V Y\K(S)                     | Y3 =n,S8 =n               | NP_008909.1    | RNF113A     |
| 467 | ELX  | 4  | ETD                             | 10.4  | 2 (K)A N\R\I\K/E C L/s\K G t/F/S D\V\T F K(L)                               | S9 =n,T12 =n              | NP_055651.1    | RHOBTB1     |
| 468 | CT   | 3  | CID                             | 13.11 | 2 (K)s/K S G/R/S\L/N E E\L G D/E D s E\K(K)                                 | S1 =n,S16 =n              | NP_002917.1    | RGS12       |
| 469 | AL   | 4  | ETD                             | 26.94 | 1 (K)R P P s D I/H D S D G S S S/S\H Q S\L\K(S)                             | S4 =n                     | NP_001005339.1 | RGS10       |
| 470 | CL   | 4  | CID                             | 13.19 | 1 (K)R P\p s\D I/H/D/S D G S S S/S S H Q S L K(S)                           | S4 =n                     | NP_001005339.1 | RGS10       |
| 471 | CT   | 3  | CID                             | 23.02 | 1 (R)E R E E s E D E L E E A N\G N/N/P I D I E V D Q N K(E)                 | S5 =k                     | NP_055971.1    | RCOR1       |
| 472 | EL   | 4  | ETD                             | 12.76 | 1 (K)A/A/A A\A W/E E P/S S/G/N/G t A R A G P R\K(R)                         | T15 =n                    | NP_061185.1    | RCC2        |
| 473 | ELX  | 3  | ETD                             | 13.23 | 1 (K)R/R s P\p A D A I P\K(S)                                               | S3 =k                     | NP_001260.1    | RCC1        |
| 474 | ELX  | 4  | ETD                             | 11.36 | 1 (K)A/D/R E V Q A\E Q P S S/S\ S P R R\K(T)                                | S14 =k                    | NP_057108.1    | RBMX2       |
| 475 | ET   | 3  | ETD                             | 19.03 | 2 (R)D/S Y S\S s R s D L Y S S/G\R(D)                                       | S6 =n,S8 =n               | NP_002130.2    | RBMX        |
| 476 | AT   | 3  | CID                             | 15.87 | 1 (R)K R s V\Q/E G E N P/D D G V R(G)                                       | S3 =n                     | NP_055829.1    | RBM34       |
| 477 | AT   | 3  | ETD                             | 11.51 | 1 (R)K/R s V\Q E/G/E N P/D D G V\R(G)                                       | S3 =n                     | NP_055829.1    | RBM34       |
| 478 | CT   | 2  | CID                             | 15.93 | 1 (R)s/V/Q/E/G/E N P D/D/G\V\R(G)                                           | S1 =n                     | NP_055829.1    | RBM34       |
| 479 | ELX  | 2  | ETD                             | 7.18  | 1 (K)L/G/A/S/N s P\G Q P N\S\V\K(R)                                         | S6 =k                     | NP_067062.1    | RBM25       |
| 480 | EL   | 4  | ETD                             | 22.09 | 1 (K)E/L P R D/F P/Y E E D/S R P R S Q\s\S\K(A)                             | S18 =n                    | NP_116294.1    | RBM17       |
| 481 | ET   | 3  | ETD                             | 16.4  | 1 (R)R P D P D/s D E D E D Y E R(E)                                         | S6 =n                     | NP_116294.1    | RBM17       |
| 482 | EL   | 5  | ETD                             | 16.75 | 4 (K)R R s L s/s D/R/G R T T H s P Y E E R S/R T\K(G)                       | S3 =n,S5 =n,S6 =n,S14 =n  | NP_037418.3    | RBM15B      |
| 483 | CL   | 4  | CID                             | 13    | 1 (K)H R\T T A P/T\E G\K\s/P L/K(K)                                         | S11 =n                    | NP_073605.4    | RBM15       |
| 484 | EL   | 4  | ETD                             | 24.16 | 1 (K)H/R T T A P T E G K s P\L K\K(E)                                       | S11 =n                    | NP_073605.4    | RBM15       |
| 485 | ET   | 4  | ETD                             | 21.27 | 1 (R)H L D R s/P E S D/R P R(K)                                             | S5 =n                     | NP_073605.4    | RBM15       |
| 486 | ET   | 4  | ETD                             | 22.48 | 1 (R)T T/A P/T E G K\s/P L K K E D\R(S)                                     | S9 =n                     | NP_073605.4    | RBM15       |
| 487 | EL   | 4  | ETD                             | 22.33 | 2 (K)R/S R/s R s P H E A G F C V Y\L\K(G)                                   | S4 =n,S6 =n               | NP_006038.2    | RBM12       |
| 488 | EL   | 5  | ETD                             | 18.95 | 4 (K)S P s G Q K R s/R s R s P\H E A G F C V Y\L\K(G)                       | S3 =n,S8 =n,S10 =n,S12 =n | NP_006038.2    | RBM12       |
| 489 | AT   | 3  | ETD                             | 8.27  | 1 (K)L/A/S/D D R/P s P P R(G)                                               | S8 =n                     | NP_690595      | RBM10       |
| 490 | CG   | 2  | CID                             | 17.28 | 1 (E)N/I Y/N D E E S D V t T\S\E(L)                                         | T11 =n                    | NP_002884.1    | RBBP7       |
| 491 | CG   | 2  | CID                             | 12.61 | 1 (E)N/I Y N/D E E\s D V T\T\S\E(L)                                         | S8 =n                     | NP_002884.1    | RBBP7       |
| 492 | ELX  | 5  | ETD                             | 24.21 | 1 (K)D/T/H E D/H D T s\T/E N T D E S\N\H D P Q F E P I V S L P E Q E I K(T) | S9 =n                     | NP_002873.1    | RANBP1      |
| 493 | AT   | 5  | CID                             | 19.99 | 2 (K)D T H E D H D\T s\T/E N T D E s\N H D\p Q F E P I V S L P E Q E\I K(T) | T8 =n,S16 =n              | NP_002873.1    | RANBP1      |
| 494 | AT   | 5  | CID                             | 18.78 | 1 (K)D T H E D H D\T s\T/E N T D E s\N H D\p Q F E P I V S L P E Q E\I K(T) | T2 =n                     | NP_002873.1    | RANBP1      |
| 495 | CL   | 4  | CID                             | 14.25 | 2 (K)D T H E D H D T S T/E N t D E s\N\H D P Q\F E P I/V S L P E Q E\I\K(T) | T13 =n,S16 =n             | NP_002873.1    | RANBP1      |

| #   | Exp. | CS | Mode | Score | Number of phosphorylation sites<br>▼ Sequence with fragments                        | Literature lookup    | RefSeq#        | Gene Symbol |
|-----|------|----|------|-------|-------------------------------------------------------------------------------------|----------------------|----------------|-------------|
| 496 | ELX  | 5  | ETD  | 13.06 | 1 (K)D/T/H E D H D T S t/E N T\D/E S/N H D P Q\F E\p I V/S L P E Q E I\K(T)         | T10 =n               | NP_002873.1    | RANBP1      |
| 497 | ELX  | 5  | ETD  | 7.54  | 2 (K)D/T/H E D H D T S t/E N T\D/E S/N H D P Q\F E\p I V/S L P E Q E I\K(T)         | S9 =n,T13 =n         | NP_002873.1    | RANBP1      |
| 498 | ET   | 4  | ETD  | 16.29 | 1 (K)Q E K P A E K P A E t P V/A T S P T A T D S T S G D/S S\R(S)                   | T11 =n               | NP_002865.1    | RAD23B      |
| 499 | CT   | 3  | CID  | 21.3  | 1 (R)E D/K s/P S/E/E S/A P T/T/S/P E/S\V/S/G S V P S S G S S G R(E)                 | S4 =n                | NP_005044.1    | RAD23A      |
| 500 | AT   | 3  | CID  | 15.76 | 1 (R)E D/K S P S E E s A P T T S P E/S\V/S/G/S/V/P S S G S S G R(E)                 | S9 =n                | NP_005044.1    | RAD23A      |
| 501 | EL   | 4  | ETD  | 22.89 | 2 (K)R/R s T s R Q\F V D G P\p G P V\K(K)                                           | S3 =n,S5 =n          | NP_037409.2    | RACGAP1     |
| 502 | CT   | 3  | CID  | 17.4  | 1 (K)T P L/S Q S\m s\V/L P T/S K/P E K(V)                                           | S8 =n                | NP_001002814.1 | RAB11FIP1   |
| 503 | AL   | 2  | CID  | 14.16 | 1 (K)A A s/T/D L/G A/G/E/T V/V\G K(V)                                               | S3 =n                | NP_056176.2    | R3HDM1      |
| 504 | CT   | 3  | CID  | 18.86 | 1 (K)E K/L Q/E E/G G G s D E E E T/G/S/P/S/E/D G m Q S A R(T)                       | S10 =k,S17 =nf       | NP_008993.1    | PWP1        |
| 505 | CT   | 3  | CID  | 23.3  | 1 (K)L Q E E/G G G s D E E E T G/S P/S/E/D/G m/Q S A R(T)                           | S8 =k,S15 =nf        | NP_008993.1    | PWP1        |
| 506 | CT   | 3  | CID  | 19.46 | 2 (K)L Q E E/G G G s D E E E T G S P/S/E/D/G m/Q/S A R(T)                           | S8 =k,S17 =n,S15 =nf | NP_008993.1    | PWP1        |
| 507 | EG   | 3  | ETD  | 15.2  | 1 (E)N/V/G/L\m Q Q Q K s F\R(-)                                                     | S10 =n               | NP_002825.3    | PTPN11      |
| 508 | CT   | 3  | CID  | 24.94 | 1 (R)V/y\E/N V G L m/Q/Q\K(S)                                                       | Y2 =k                | NP_002825.3    | PTPN11      |
| 509 | ET   | 3  | ETD  | 13.76 | 1 (R)V/y\E N V G L m Q Q Q\K(S)                                                     | Y2 =k                | NP_002825.3    | PTPN11      |
| 510 | CG   | 3  | CID  | 19.47 | 1 (E)V/D G A D D D\ S Q/D s D D E K m P D\L\E(-)                                    | S11 =n               | NP_006592.3    | PTGES3      |
| 511 | CG   | 3  | CID  | 16.38 | 2 (E)V/D/G A/D D D\s/Q D s D D E K/m P D\L\E(-)                                     | S8 =n,S11 =n         | NP_006592.3    | PTGES3      |
| 512 | CT   | 4  | CID  | 24.24 | 1 (R)F/S/E m m N N m G G D E D V D L P/E/V/D G A/D D/D s Q D S D D E/K m P D\L\E(-) | S26 =n               | NP_006592.3    | PTGES3      |
| 513 | CT   | 4  | CID  | 21.02 | 2 (R)F S E m m N N m\G G D E D\V D L P/E V D G A D D D s Q D S D D E/K/m/P D L E(-) | S26 =n,S29 =n        | NP_006592.3    | PTGES3      |
| 514 | CT   | 4  | CID  | 20.12 | 1 (R)F S/E m m N N m\G G D E D V D L P/E V D/G A D D D S Q D S D D E/K/m/P D L E(-) | S29 =n               | NP_006592.3    | PTGES3      |
| 515 | ELX  | 3  | ETD  | 8.45  | 1 (K)I/N E/T\R A F/s\G(-)                                                           | S8 =n                | NP_077748.2    | PSTPIP2     |
| 516 | EL   | 3  | ETD  | 20.69 | 1 (K)E/S L K E E D E/s D D D N\M(-)                                                 | S9 =k,S2 =nf         | NP_002779.1    | PSMA3       |
| 517 | CL   | 2  | CID  | 15.21 | 1 (K)E S L K/E E D E s D D\N\M(-)                                                   | S9 =k,S2 =nf         | NP_002779.1    | PSMA3       |
| 518 | AL   | 2  | CID  | 13.85 | 1 (K)E S/L K/E E D E s D/D D\N m(-)                                                 | S9 =k,S2 =nf         | NP_002779.1    | PSMA3       |
| 519 | AL   | 3  | ETD  | 11.76 | 1 (K)E/S L/K E/E D\E/s D D D N\M(-)                                                 | S9 =k,S2 =nf         | NP_002779.1    | PSMA3       |
| 520 | ET   | 4  | ETD  | 25.26 | 1 (K)E/T S V/S K\E D\T/D H\E E K\A s\N\E D\V\T\K(A)                                 | S16 =n               | NP_066967.2    | PSIP1       |
| 521 | ELX  | 4  | ETD  | 25.16 | 2 (K)E/T/S V S\K E D t D\H\E\E K A s N E D V\T\K(A)                                 | T9 =n,S16 =n         | NP_066967.2    | PSIP1       |
| 522 | CL   | 2  | CID  | 10.21 | 1 (K)Q S N A/S/s/D V/E/V/E/E K(E)                                                   | S6 =k                | NP_066967.2    | PSIP1       |
| 523 | ELX  | 3  | ETD  | 15.35 | 2 (K)T/G/V T/S T s D s/E\E E G D\D Q E\G E\K(K)                                     | S7 =n,S9 =k          | NP_066967.2    | PSIP1       |
| 524 | EL   | 4  | ETD  | 17.4  | 1 (K)W/D E Q/T/S N T K G D D D E E s D E\E A V\K\K(T)                               | S16 =n               | NP_004689.1    | PRPF3       |
| 525 | ET   | 3  | ETD  | 18.28 | 1 (R)A E A P P L E R E\D s G T F S L G\K(M)                                         | S11 =n               | NP_003681.1    | PRKRA       |
| 526 | CT   | 4  | CID  | 14.31 | 2 (R)A P/A/S V/L P A A t P R\Q/s/L\G H P P P/E P G P D R(V)                         | T10 =n,S14 =n,S4 =nf | NP_004148.1    | PRKAR2A     |
| 527 | CT   | 3  | CID  | 13.53 | 2 (R)V A D A K G/D s E s E E D E\D/L E V P\V P S R(F)                               | S8 =k,S10 =k         | NP_004148.1    | PRKAR2A     |
| 528 | EL   | 4  | ETD  | 23.03 | 1 (K)A/G/T R T D S R E D E I s P P P P N P\V\K(G)                                   | S13 =k               | NP_002725.1    | PRKAR1A     |



| #   | Exp. | CS | Mode | Score | Number of phosphorylation sites<br>▼ Sequence with fragments                             | Literature lookup    | RefSeq#     | Gene<br>Symbol |
|-----|------|----|------|-------|------------------------------------------------------------------------------------------|----------------------|-------------|----------------|
| 529 | AG   | 5  | ETD  | 11.15 | 2 (E)L Q Q A/I S K L E A Q L\N V\L E K/s/S P G/H/R\A\T A P Q T Q H V\s P<br>m R/Q V E(S) | S18 =n,S33 =n        | XP_949815.1 | <b>Predic.</b> |
| 530 | ELX  | 3  | ETD  | 16.12 | 1 (K)D/E/L/H\I V E\A E A m N Y K G s P\I\K(V)                                            | S16 =n               | XP_945199.1 | <b>Predic.</b> |
| 531 | AL   | 4  | ETD  | 12.81 | 1 (K)E/S C E\S T S L K/K/t P N R\K(Q)                                                    | T11 =n               | XP_059482.5 | <b>Predic.</b> |
| 532 | ELX  | 4  | ETD  | 12.32 | 2 (K)K s/S F E\N T/V\V\R K V/S/V/t L K(E)                                                | S2 =n,T15 =n         | XP_945327.1 | <b>Predic.</b> |
| 533 | EL   | 4  | ETD  | 10.09 | 1 (K)L/Q T/D\E E R\E/K\N G s E E/D\D\D E K P G\K(R)                                      | S12 =n               | XP_379933.2 | <b>Predic.</b> |
| 534 | ET   | 4  | ETD  | 10.55 | 2 (K)Q L I V G V N K m\D S T E P P y s H K(R)                                            | Y16 =n,S17 =n        | XP_950453.1 | <b>Predic.</b> |
| 535 | ELX  | 3  | ETD  | 14.46 | 1 (K)S/E/s P K E P K Q L R\K(L)                                                          | S3 =n                | XP_379885.2 | <b>Predic.</b> |
| 536 | ELX  | 3  | ETD  | 15.54 | 2 (K)S P/Q L S/L s P R P A s P\K(A)                                                      | S7 =n,S12 =n         | XP_950070.1 | <b>Predic.</b> |
| 537 | AT   | 4  | ETD  | 11.98 | 2 (R)C V/Q A/S t A\A P G\G R/L s K(D)                                                    | T6 =n,S13 =n         | XP_951336.1 | <b>Predic.</b> |
| 538 | CT   | 2  | CID  | 15.84 | 1 (R)Y F Q\I S Q D E D\E S E s E\D(-)                                                    | S13 =n               | XP_947405.1 | <b>Predic.</b> |
| 539 | ET   | 4  | ETD  | 24.51 | 1 (K)H G/E V\C P A\G W K\A/P G S D t I K P\A V Q\K(S)                                    | T15 =n               | NP_002565.1 | PRDX1          |
| 540 | AL   | 4  | CID  | 17.94 | 1 (K)H G E V C P A G W K P G S D t I K P D V Q K(S)                                      | T15 =n               | NP_002565.1 | PRDX1          |
| 541 | AL   | 4  | ETD  | 28.91 | 2 (K)I/A A P E L H K\G D s D s E E D E P T\K(K)                                          | S11 =n,S13 =n        | NP_005964.3 | PRCC           |
| 542 | EL   | 3  | ETD  | 24.63 | 1 (K)N/H S D S S T S E S E V S S V s P L\K(N)                                            | S16 =n               | NP_777567.1 | PPP4R2         |
| 543 | CL   | 3  | CID  | 16.65 | 1 (K)N H S D S/S T/S/E S E V S/S V s P L\K(N)                                            | S16 =n               | NP_777567.1 | PPP4R2         |
| 544 | ELX  | 4  | ETD  | 25.44 | 1 (K)N/K T/s T T S S M V A S A E Q P/R/G N\V\D E E L\S\K(K)                              | S4 =n                | NP_006232.1 | PPP1R2         |
| 545 | ELX  | 4  | ETD  | 16.86 | 1 (K)N/K T/s T T S S m V A S A E Q P R/G N\V\D E E L\S\K(K)                              | S4 =n                | NP_006232.1 | PPP1R2         |
| 546 | ELX  | 4  | ETD  | 18.38 | 2 (K)Y/R I Q E Q\E s s G E E D S D/L S P/E E\R E\K(K)                                    | S8 =k,S9 =k          | NP_006232.1 | PPP1R2         |
| 547 | ET   | 4  | ETD  | 12.91 | 2 (R)S S G/S D P R\S W E y R/s G E A S E E K E E\K(A)                                    | Y11 =n,S13 =n        | NP_055145.2 | PPP1R15A       |
| 548 | EL   | 4  | ETD  | 10.59 | 1 (K)S m H/L G/R L P\s R P\A P/L/P G\S G\G S\Q S G A\K(M)                                | S9 =n                | NP_057231.1 | PPME1          |
| 549 | EL   | 4  | ETD  | 7.73  | 1 (K)R/K L E E/V L s\T\E G A E E\N G N\S D\K(K)                                          | S8 =n                | NP_002698.1 | PPM1G          |
| 550 | EL   | 4  | ETD  | 12.98 | 1 (K)R K L\E E V\L s T\E\G A E\N G N S\D\K\K(K)                                          | S8 =n                | NP_002698.1 | PPM1G          |
| 551 | EL   | 3  | ETD  | 11.99 | 2 (K)I/T/D/H R N V/s\E s P N R\K(N)                                                      | S8 =n,S10 =n         | NP_004783.2 | PPIG           |
| 552 | EL   | 4  | ETD  | 12.64 | 2 (K)D/S P H S R s G/S S V\S S R\S Y s P\E R\S\K(S)                                      | S7 =n,S17 =n         | NP_057572.5 | PPHLN1         |
| 553 | EL   | 4  | ETD  | 20.84 | 3 (K)E/R/P V Q\S L K\T/s R/D T S/P S s G S A V S S\S\K(V)                                | T9 =n,S10 =n,S17 =n  | NP_057572.5 | PPHLN1         |
| 554 | EL   | 4  | ETD  | 20.79 | 2 (K)E/R P V Q/S L K T S R D t s P\S S G S A V S S\S\K(V)                                | T13 =n,S14 =n        | NP_057572.5 | PPHLN1         |
| 555 | AL   | 4  | ETD  | 19.17 | 2 (K)E/R P V Q S L\K T s R D T s P\S/S G S A V S S\S K(V)                                | S10 =n,S14 =n        | NP_057572.5 | PPHLN1         |
| 556 | EL   | 4  | ETD  | 18.93 | 2 (K)E/R P V Q/S L K t s R\D t s P\S S G S A V S S\S\K(V)                                | T9 =n,T13 =n         | NP_057572.5 | PPHLN1         |
| 557 | ELX  | 4  | ETD  | 18.58 | 2 (K)E/R P V Q\S L K t s R\D T S\P/s S G S A V\S/S S\K(V)                                | T9 =n,S16 =n         | NP_057572.5 | PPHLN1         |
| 558 | EL   | 4  | ETD  | 18.29 | 2 (K)E/R/P V Q S L K T s R/D/T s P\S S G S A V S S\S\K(V)                                | S10 =n,S14 =n        | NP_057572.5 | PPHLN1         |
| 559 | EL   | 4  | ETD  | 16.63 | 3 (K)E/R P V/Q S L K T\s R\D T s P\S/s G\S A V/S\S S\K(V)                                | S10 =n,S14 =n,S17 =n | NP_057572.5 | PPHLN1         |
| 560 | EL   | 4  | ETD  | 16.39 | 2 (K)s/F Y/S/S/H Y A R E R s P\Y\K(R)                                                    | S1 =n,S12 =n         | NP_057572.5 | PPHLN1         |
| 561 | EL   | 3  | ETD  | 12.26 | 1 (K)R/I N P P S S G G T S S s P I\K(A)                                                  | S13 =k               | NP_002688.2 | POU2F1         |
| 562 | ET   | 5  | ETD  | 24.99 | 1 (K)R G D G E K s D E E\N E E K E G\S\K/E\K(S)                                          | S7 =n                | NP_006458.1 | POLR3G         |
| 563 | ELX  | 3  | ETD  | 7.46  | 2 (K)G/A/V/G/A/s V T S s\T H E\K\K(S)                                                    | S6 =n,S10 =n         | NP_060552.3 | POLR3B         |

| #   | Exp. | CS | Number of phosphorylation sites |       | Sequence with fragments                                             | Literature lookup        | RefSeq#        | Gene Symbol |
|-----|------|----|---------------------------------|-------|---------------------------------------------------------------------|--------------------------|----------------|-------------|
|     |      |    | Mode                            | Score |                                                                     |                          |                |             |
| 564 | AL   | 4  | ETD                             | 17.65 | 1 (K)s Y R G D\R E A F E E\T H\L T S L\D P V\K(Q)                   | S1 =n                    | NP_060599.1    | PNPO        |
| 565 | EL   | 3  | ETD                             | 10.73 | 1 (K)H/R R s V D R\K(R)                                             | S4 =n                    | AAB48304.1     | PNN         |
| 566 | EL   | 4  | ETD                             | 13.82 | 3 (K)N/S R S D\R K\R s I s E S\s R S G\K(R)                         | S9 =k,S11 =n,S14 =n      | AAB48304.1     | PNN         |
| 567 | ET   | 3  | ETD                             | 11.48 | 1 (K)S/L/s P G K\E N\V/S A L D m\E\K(E)                             | S3 =k                    | AAB48304.1     | PNN         |
| 568 | ET   | 4  | ETD                             | 17.98 | 1 (K)S L/s P G K E N/V S A L D m E K E S E K E E\K(E)               | S3 =k                    | NP_002678.2    | PNN         |
| 569 | ET   | 5  | ETD                             | 11.12 | 3 (K)s\S K\G G/s\s/R D/T/K\G S K(D)                                 | S1 =n,S6 =n,S7 =n        | AAB48304.1     | PNN         |
| 570 | ET   | 4  | ETD                             | 8.53  | 1 (R)E S/R Q E S/D P\E/D D D V\K K P A L Q s S\V V A T\S\K(E)       | S20 =n                   | AAB48304.1     | PNN         |
| 571 | ET   | 4  | ETD                             | 14.35 | 1 (R)Q/E s D P E/D D/D V/K/K P A L Q/S S\V\V A\T\S\K(E)             | S3 =n                    | AAB48304.1     | PNN         |
| 572 | ET   | 5  | ETD                             | 22.16 | 2 (R)R/E\s R Q E s D P E/D D/D V\K\K\P\A\L Q\S S V\V A T\S\K(E)     | S3 =n,S7 =n              | NP_002678.2    | PNN         |
| 573 | ET   | 4  | ETD                             | 6.53  | 2 (R)R/E\S R Q E s D P E D D D V K K P A L Q s S V\V A\T\S\K(E)     | S7 =n,S21 =n             | NP_002678.2    | PNN         |
| 574 | ET   | 5  | ETD                             | 8.09  | 4 (R)s H\K/S s K\G G s\s R D T/K\G/S K(D)                           | S1 =n,S5 =n,S9 =n,S10 =n | NP_002678.2    | PNN         |
| 575 | ET   | 5  | ETD                             | 16.34 | 2 (R)T/R R E s\R Q E s\D\P E D D\D V K\K P\A L Q\S S\V\V A T\S\K(E) | S5 =n,S9 =n              | NP_002678.2    | PNN         |
| 576 | EL   | 4  | ETD                             | 22.84 | 2 (K)E/A R L A R S s P E Q P R P s T S\K(A)                         | S8 =n,S15 =n             | NP_002666.1    | PML         |
| 577 | AL   | 5  | CID                             | 11.12 | 1 (K)A N V T P\Q S s\S\E\L R P T T/T A A L A S/G V E A K(K)         | S8 =n                    | NP_000924.2    | PLCB4       |
| 578 | CT   | 4  | CID                             | 10.45 | 2 (R)L D I\D s P P I/T/A/R N/t G I I/C T I G P\A S R(S)             | S5 =n,T13 =n             | NP_002645.3    | PKM2        |
| 579 | CT   | 3  | CID                             | 15.53 | 3 (R)M/m s/Q\L F L\D t P V/s\K T E K(T)                             | S3 =n,T9 =n,S12 =n       | NP_000288.1    | PKD2        |
| 580 | CT   | 2  | CID                             | 11.3  | 1 (R)V/D/R/m/E H\s I\G S I V S K(I)                                 | S7 =n                    | NP_000288.1    | PKD2        |
| 581 | CG   | 2  | CID                             | 14.53 | 2 (E)P/Y/t/D F D/G T R V Y s\P\P\E(W)                               | T3 =n,S12 =n             | NP_006866.2    | PIM2        |
| 582 | CG   | 2  | CID                             | 13.92 | 1 (E)P/Y/T/D F D/G\T R V Y s\P\P\E(W)                               | S12 =n                   | NP_006866.2    | PIM2        |
| 583 | CL   | 4  | CID                             | 19.06 | 2 (K)T A H N S E A\A D L E E s F N E H E L E P s s P K(S)           | S13 =n,S22 =n            | NP_115711.2    | PHF6        |
| 584 | CL   | 4  | CID                             | 10.68 | 2 (K)T A H N/s E\A A D L E E S F N E H E L E P s s P K(S)           | S5 =n,S23 =n             | NP_115711.2    | PHF6        |
| 585 | ELX  | 4  | ETD                             | 29.43 | 2 (K)T A/H N/s E A D L E E S F N E H E L E P s P\K(S)               | S5 =n,S22 =n             | NP_001015877.1 | PHF6        |
| 586 | ELX  | 4  | ETD                             | 26.15 | 2 (K)T A/H\N/S\E/A\D L E\E s F N E H\E L E P s S P\K(S)             | S12 =n,S21 =n            | NP_001015877.1 | PHF6        |
| 587 | ET   | 4  | ETD                             | 12.82 | 2 (R)D R s P H R S s P/S D T R P K(C)                               | S3 =n,S8 =n              | NP_001015877.1 | PHF6        |
| 588 | ET   | 3  | ETD                             | 15.78 | 2 (R)R A s K A/s L/P P L T K(D)                                     | S3 =n,S6 =n              | NP_004418.2    | PHC2        |
| 589 | AL   | 2  | CID                             | 16.51 | 1 (K)E G E/E P/T/V Y s/D/E E E\P K(D)                               | S9 =k                    | NP_006658.1    | PGRMC1      |
| 590 | EL   | 4  | ETD                             | 25.55 | 1 (K)E/G/E E P T V Y s D E E E P K\D E S\A R\K(N)                   | S9 =k                    | NP_006658.1    | PGRMC1      |
| 591 | CL   | 3  | CID                             | 10.68 | 1 (K)E/G/E E/P/T V/Y/s D/E E E/P K D/E S A R K(N)                   | S9 =k                    | NP_006658.1    | PGRMC1      |
| 592 | EL   | 4  | ETD                             | 16.99 | 1 (K)E/G/E E/P T V Y s D E E E P K D\E\S\A R K N\D(-)               | S9 =k                    | NP_006658.1    | PGRMC1      |
| 593 | AL   | 4  | CID                             | 20.26 | 1 (K)I V R G D\Q P A A S/G/D/s/D/D/D E/P/P/P L P R L K(R)           | S13 =k                   | NP_006658.1    | PGRMC1      |
| 594 | EL   | 4  | ETD                             | 18.84 | 1 (K)I/V/R\G D Q P A A\S\G D s/D D D E\P P P L P/R L\K(R)           | S13 =k                   | NP_006658.1    | PGRMC1      |
| 595 | ELX  | 5  | ETD                             | 10.12 | 1 (K)G K\D A s G\N/K V K A E P/A K(I)                               | S5 =n                    | NP_000282.1    | PGK1        |
| 596 | ELX  | 3  | ETD                             | 5.25  | 1 (-)M t H E E H H\A/A K(T)                                         | T2 =n                    | NP_000280.1    | PFKM        |
| 597 | EL   | 3  | ETD                             | 20.8  | 1 (K)A/K P s P A P P S T T T A P D A S G P\Q\K(R)                   | S4 =n                    | NP_002848.1    | PEX19       |
| 598 | CL   | 3  | CID                             | 15.24 | 1 (K)A K/P s P\A P P S T T/T A P D A/S G P Q\K(R)                   | S4 =n                    | NP_002848.1    | PEX19       |

| #   | Exp. | CS | Mode | Number of phosphorylation sites |   | Sequence with fragments                                                 | Literature lookup     | RefSeq#        | Gene Symbol |
|-----|------|----|------|---------------------------------|---|-------------------------------------------------------------------------|-----------------------|----------------|-------------|
|     |      |    |      | Score                           | ▼ |                                                                         |                       |                |             |
| 599 | CL   | 4  | CID  | 16.27                           | 1 | (K)A K P S P A P P S T/T/T/A P/D A/S G P Q K R s P G D T A K(D)         | S23 =n                | NP_002848.1    | PEX19       |
| 600 | CL   | 4  | CID  | 13.12                           | 1 | (K)A M E G L G M D E G D G E G N/I/L P/I m Q s\I m Q N L L S K(D)       | S22 =n                | NP_002848.1    | PEX19       |
| 601 | EL   | 3  | ETD  | 22.06                           | 1 | (K)N/A T/D/L Q/N S s m S E E L\T\K(A)                                   | S9 =n                 | NP_002848.1    | PEX19       |
| 602 | CL   | 3  | CID  | 20.5                            | 1 | (K)N A/T/D/L Q N S s m/S/E/E/E\T\K(A)                                   | S9 =n                 | NP_002848.1    | PEX19       |
| 603 | CL   | 3  | CID  | 19                              | 1 | (K)N A/T D/L Q N s S M/S E/E E\T\K(A)                                   | S8 =n                 | NP_002848.1    | PEX19       |
| 604 | EL   | 3  | ETD  | 13.33                           | 1 | (K)N/A\T D/L Q/N/S s M S E E L T\K(A)                                   | S9 =n                 | NP_002848.1    | PEX19       |
| 605 | EL   | 2  | ETD  | 10.21                           | 1 | (K)N/A T/D/L Q/N/S/S/m s s E E E\T\K(A)                                 | S11 =n                | NP_002848.1    | PEX19       |
| 606 | EG   | 5  | ETD  | 23.03                           | 2 | (E)L/D/T K L/T R I P s/A K K/Y K D I I R Q\p\S\E\E(E)                   | S10 =k,Y14 =n,S22 =nf | NP_003759.1    | PEA15       |
| 607 | EG   | 5  | ETD  | 11.05                           | 2 | (E)Y G t L L/Q/D L T/N N I T L E D L E Q L K s\A C K\E(D)               | T3 =n,S22 =n          | NP_003759.1    | PEA15       |
| 608 | ET   | 3  | ETD  | 20.42                           | 1 | (K)D/I/I/R Q P s E E I\I\K(L)                                           | S7 =k                 | NP_003759.1    | PEA15       |
| 609 | EL   | 3  | ETD  | 16.73                           | 2 | (K)A P/R P F G s V S s P\K(V)                                           | S7 =n,S10 =n          | NP_006448.2    | PDLIM5      |
| 610 | AL   | 3  | CID  | 11.9                            | 2 | (K)A/P/R P F G s V s S/P K(V)                                           | S7 =n,S9 =n           | NP_006448.2    | PDLIM5      |
| 611 | EL   | 5  | ETD  | 11.08                           | 1 | (K)H I V E/R\Y T E/F y H V P/T/H\S\D A S\K(K)                           | Y10 =n                | NP_001011513.1 | PDLIM5      |
| 612 | EG   | 4  | ETD  | 15.2                            | 1 | (E)K H A R E R V T P/P E G\y\E(V)                                       | Y13 =k                | NP_066272.1    | PDLIM1      |
| 613 | ELX  | 3  | ETD  | 12.71                           | 1 | (K)G D/P N/K P S/G F R/s\V\K(A)                                         | S11 =n                | NP_066272.1    | PDLIM1      |
| 614 | ELX  | 4  | ETD  | 27.6                            | 2 | (K)T/A A S G V E A/N\S R P\L D H A Q P P s L\V I\D\K(E)                 | S20 =n,S21 =n         | NP_066272.1    | PDLIM1      |
| 615 | ELX  | 4  | ETD  | 24.96                           | 1 | (K)T/A/A/S G V E A N S R/P L D/H/A Q/P P S s L\V I\D\K(E)               | S21 =n                | NP_066272.1    | PDLIM1      |
| 616 | ET   | 5  | ETD  | 16.42                           | 1 | (K)T A A/S G V/E/A N S R P L D H/A Q P/P s\S L V I D K E/S\E\V Y\K(M)   | S20 =n                | NP_066272.1    | PDLIM1      |
| 617 | ELX  | 3  | ETD  | 15.69                           | 1 | (K)R/F\V\s E G D G G R L K P\E\S\Y(-)                                   | S4 =k                 | NP_055271.2    | PDCD4       |
| 618 | ELX  | 3  | ETD  | 13.13                           | 1 | (K)R/m Q S L s L N\K(-)                                                 | S6 =n                 | NP_055706.1    | PDAP1       |
| 619 | ELX  | 3  | ETD  | 12.13                           | 1 | (K)S L/D S D E\s E D\E E D D Y Q Q\K(R)                                 | S7 =k,S4 =nf          | NP_055706.1    | PDAP1       |
| 620 | ELX  | 3  | ETD  | 10.79                           | 1 | (K)S L/D/S D E/S E D\E E D D Y Q Q K(R)                                 | Y14 =n,S4 =nf,S7 =nf  | NP_055706.1    | PDAP1       |
| 621 | ELX  | 3  | ETD  | 8.63                            | 1 | (K)S/L D s D/E\S E D\E E D D Y Q Q\K(R)                                 | S4 =k,S7 =nf          | NP_055706.1    | PDAP1       |
| 622 | ELX  | 3  | ETD  | 6.99                            | 2 | (K)S/L/D s D E s/E D E E D D Y Q Q K(R)                                 | S4 =k,S7 =k           | NP_055706.1    | PDAP1       |
| 623 | ET   | 3  | ETD  | 14.07                           | 2 | (R)Y K/s t T S/V\S E E D V\S S\R(Y)                                     | S3 =n,T4 =n           | NP_002574.2    | PAWR        |
| 624 | CT   | 3  | CID  | 11.05                           | 2 | (R)y K S T T\ s V S E E D V S S R(Y)                                    | Y1 =n,S6 =n           | NP_002574.2    | PAWR        |
| 625 | EL   | 3  | ETD  | 17.66                           | 1 | (K)A/S/R T\A/R/I/A\s D E E I Q G\T\K(D)                                 | S9 =n                 | NP_057165.2    | PALLD       |
| 626 | AT   | 2  | CID  | 20.25                           | 2 | (R)T L s N/A/E D Y L D D E\D s\D(-)                                     | S3 =n,S14 =n          | NP_036515.3    | OSTF1       |
| 627 | EL   | 4  | ETD  | 15.61                           | 1 | (K)V/E E E G s P G D\p D H E A/S T Q G R\T\C G P E H S\K(G)             | S6 =n                 | NP_031372.2    | OGFR        |
| 628 | EG   | 3  | ETD  | 21.77                           | 1 | (E)T Q/s P/S L F/G\S T K L Q Q\E(S)                                     | S3 =n                 | NP_009103.2    | NUP50       |
| 629 | CG   | 2  | CID  | 16.62                           | 1 | (E)t/Q S/P S/L/F/G S/T K L Q\Q\E(S)                                     | T1 =n                 | NP_009103.2    | NUP50       |
| 630 | ELX  | 3  | ETD  | 8.5                             | 1 | (K)E R S s L\L A V S N\K(Y)                                             | S4 =n                 | NP_005076.3    | NUP214      |
| 631 | ET   | 5  | ETD  | 14.52                           | 1 | (K)D A/E N H E A/Q L K N/G S L D/s P G\K\Q D T E/E D E E E D/E K D\K(G) | S16 =n                | NP_006591.1    | NUDC        |
| 632 | EL   | 3  | ETD  | 14.49                           | 1 | (K)L/S/D/L D S E T\R\s m V E\K(M)                                       | S10 =n                | NP_006591.1    | NUDC        |
| 633 | CL   | 3  | CID  | 18.91                           | 1 | (K)N G S L/D/s/P\G K Q D/T/E E D/E E/E D\E K(D)                         | S6 =n                 | NP_006591.1    | NUDC        |

| #   | Exp. | CS | Number of phosphorylation sites |       |   | Sequence with fragments                                                     | Literature lookup    | RefSeq#     | Gene Symbol |
|-----|------|----|---------------------------------|-------|---|-----------------------------------------------------------------------------|----------------------|-------------|-------------|
|     |      |    | Mode                            | Score | ▼ |                                                                             |                      |             |             |
| 634 | AL   | 3  | CID                             | 17.01 | 1 | (K)N G S/L/D/S/P/G K Q D t/E E D E/E E\D\E K(D)                             | T12 =n               | NP_006591.1 | NUDC        |
| 635 | CL   | 3  | CID                             | 15.04 | 2 | (K)N G S/L/D/s/P/G K Q D t E/E D E/E/E D\E K(D)                             | S6 =n,T12 =n         | NP_006591.1 | NUDC        |
| 636 | ET   | 4  | ETD                             | 10.11 | 1 | (K)N/G/S/L D S P/G K Q D t E E E D E E D\E K/D K\G\K(L)                     | T12 =n               | NP_006591.1 | NUDC        |
| 637 | CL   | 3  | CID                             | 15.58 | 1 | (K)T/P/S P/K E\E\D E\E P\E s/P P E K(K)                                     | S13 =k,S3 =nf        | NP_073568.2 | NUCKS1      |
| 638 | ELX  | 3  | ETD                             | 7.4   | 1 | (K)T P/S P K E E D E\E P E\s P P E\K(K)                                     | S13 =k,S3 =nf        | NP_073568.2 | NUCKS1      |
| 639 | AL   | 4  | ETD                             | 15.58 | 1 | (K)S/A/E/T/R E S T Q L S P A D L/t E G K P T D P S K(L)                     | T16 =n,S11 =nf       | NP_060225.4 | NSUN2       |
| 640 | ET   | 3  | ETD                             | 22.39 | 1 | (R)K/K s P N E L V D D L F K(G)                                             | S3 =n                | NP_057227.2 | NSFL1C      |
| 641 | CT   | 2  | CID                             | 20.46 | 1 | (R)L G/A/A P E/E/E S/A/y V/A/G E K(R)                                       | Y11 =n               | NP_057227.2 | NSFL1C      |
| 642 | CT   | 3  | CID                             | 15.73 | 1 | (R)L/G/A A P/E E E s A Y/V A/G E/K R(Q)                                     | S9 =n                | NP_057227.2 | NSFL1C      |
| 643 | ET   | 3  | ETD                             | 14.54 | 1 | (R)L/G/A/A P E E E S/A y V\A G E\K\R(Q)                                     | Y11 =n               | NP_057227.2 | NSFL1C      |
| 644 | CL   | 3  | CID                             | 14.03 | 1 | (K)T P\t P E P A E V/E/T R K(V)                                             | T3 =k                | NP_037524.1 | NRBP        |
| 645 | EL   | 3  | ETD                             | 8.48  | 1 | (K)t P T P/E/P/A\E V E T R\K(V)                                             | T1 =n,T3 =nf         | NP_037524.1 | NRBP        |
| 646 | EL   | 5  | ETD                             | 15    | 1 | (K)D A A A H L Q T S\H K P S\A E D A/E G Q S/P L S\Q K Y/s P\S\T E\K(C)     | S28 =n               | NP_110386.1 | NRBF2       |
| 647 | EG   | 3  | ETD                             | 16.42 | 1 | (E)K T/P K t P K G P\S\S\V\E(D)                                             | T5 =k,T2 =nf         | NP_002511.1 | NPM1        |
| 648 | EG   | 3  | ETD                             | 11.09 | 2 | (E)K/t P\K t P K\G P S\S V\E(D)                                             | T2 =k,T5 =k          | NP_002511.1 | NPM1        |
| 649 | AG   | 5  | ETD                             | 27.56 | 1 | (E)K/T/P/K t P K G/P S S V E D I K A K m Q A S\I\E(K)                       | T5 =k,T2 =nf,S22 =nf | NP_002511.1 | NPM1        |
| 650 | EG   | 4  | ETD                             | 13.64 | 2 | (E)K/t P/K t P K G P S S V E D I\K A\K m Q\A S I\E(K)                       | T2 =k,T5 =k,S22 =nf  | NP_002511.1 | NPM1        |
| 651 | CT   | 4  | CID                             | 18.71 | 1 | (K)C G S G/P/V H I S G/Q H L V A V\E E D\A\E\s E\D E E E E\D\V\K(L)         | S22 =k               | NP_002511.1 | NPM1        |
| 652 | CT   | 3  | CID                             | 17.47 | 1 | (K)D/E/L H I V E\A\E\A m N/Y E G s P I\K(V)                                 | S16 =k               | NP_002511.1 | NPM1        |
| 653 | ELX  | 3  | ETD                             | 13    | 1 | (K)D/E/L/H I V E A\E\A m N Y E G s P I\K(V)                                 | S16 =k               | NP_002511.1 | NPM1        |
| 654 | ET   | 3  | ETD                             | 12.72 | 1 | (K)G/G/s L P/K V E A\K(F)                                                   | S3 =n                | NP_002511.1 | NPM1        |
| 655 | CT   | 3  | CID                             | 11.42 | 1 | (K)G G s L/P K/V/E A K(F)                                                   | S3 =n                | NP_002511.1 | NPM1        |
| 656 | ELX  | 4  | ETD                             | 22.72 | 2 | (K)K/Q E K t P\K t P/K G P/S\S\V E D\I\K(A)                                 | T5 =k,T8 =n          | NP_954654.1 | NPM1        |
| 657 | CL   | 2  | CID                             | 10.19 | 1 | (K)L/L s I/S/G/K(R)                                                         | S3 =n                | NP_002511.1 | NPM1        |
| 658 | EL   | 2  | ETD                             | 7.25  | 1 | (K)L/L/s I/S\G\K(R)                                                         | S3 =n                | NP_002511.1 | NPM1        |
| 659 | ET   | 4  | ETD                             | 24.17 | 1 | (K)m Q A S I E K\G\G s L/P K V E\A\K(F)                                     | S10 =n,S4 =nf        | NP_002511.1 | NPM1        |
| 660 | EL   | 3  | ETD                             | 16.76 | 1 | (K)S I R\D t\P A K N A\Q\K(S)                                               | T5 =k                | NP_002511.1 | NPM1        |
| 661 | ELX  | 3  | ETD                             | 14.23 | 2 | (K)t/P K\t P K G P S S V E D\I\K(A)                                         | T1 =k,T4 =k          | NP_002511.1 | NPM1        |
| 662 | ET   | 3  | ETD                             | 10.91 | 1 | (K)T P/K t P K G P\S S V E D\I\K(A)                                         | T4 =k,T1 =nf         | NP_002511.1 | NPM1        |
| 663 | ET   | 4  | ETD                             | 26.5  | 1 | (K)T/P/K t P K G P/S S V E D I K\A\K(M)                                     | T4 =k,T1 =nf         | NP_002511.1 | NPM1        |
| 664 | CT   | 4  | CID                             | 13.78 | 1 | (R)T V S L G/A G A K D\E\L\H I V E A E\A m N Y E G s P I/K V/T L A T L K(M) | S25 =k               | NP_002511.1 | NPM1        |
| 665 | EL   | 5  | ETD                             | 15.55 | 3 | (K)R/K L L N K\L t/K s\t/E K L\E\K(E)                                       | T8 =n,S10 =n,T11 =n  | NP_443178.1 | NOSTRIN     |
| 666 | EG   | 3  | ETD                             | 12.85 | 1 | (E)L/Q/R A A s/Q D H V R G\F\L\E(K)                                         | S6 =n                | NP_057037.1 | NOSIP       |
| 667 | ELX  | 4  | ETD                             | 29.28 | 1 | (K)E L Q R A A s Q D H V R G F L E\K(E)                                     | S7 =n                | NP_057037.1 | NOSIP       |

| #   | Exp. | CS | Number of phosphorylation sites |       | Sequence with fragments                                             | Literature lookup   | RefSeq#        | Gene Symbol |
|-----|------|----|---------------------------------|-------|---------------------------------------------------------------------|---------------------|----------------|-------------|
|     |      |    | Mode                            | Score |                                                                     |                     |                |             |
| 668 | CG   | 2  | CID                             | 21.63 | 1 (E)G I G A I/G/G t P P/A/F/N R\A A P G A\E(F)                     | T8 =n               | NP_031389.3    | NONO        |
| 669 | AG   | 3  | ETD                             | 15.16 | 1 (E)G/I G/A I G G t P/P A F N R\A A P G\A\E(F)                     | T8 =n               | NP_031389.3    | NONO        |
| 670 | EL   | 3  | ETD                             | 11.87 | 1 (K)G/K/G s P R P Q A\P\K(A)                                       | S4 =n               | AAH01883.1     | NOLC1       |
| 671 | AL   | 2  | CID                             | 19.98 | 1 (K)G T D/T\Q T P A/V L s P S K(T)                                 | S11 =k              | NP_001028886.1 | NOL1        |
| 672 | EL   | 2  | ETD                             | 10.09 | 1 (K)G T/D/T/Q/T P/A/V\L s P\S\K(T)                                 | S11 =k              | NP_001028886.1 | NOL1        |
| 673 | CL   | 3  | CID                             | 17.57 | 1 (K)R/R L\G s V E A P K(T)                                         | S5 =n               | NP_001028886.1 | NOL1        |
| 674 | EL   | 3  | ETD                             | 13.59 | 1 (K)R R L/G s V E A P\K(T)                                         | S5 =n               | NP_001028886.1 | NOL1        |
| 675 | CL   | 3  | CID                             | 11.7  | 2 (K)R s D\L/y\A\V\E\m K(K)                                         | S2 =n,Y5 =n         | NP_064587.1    | NIT2        |
| 676 | EL   | 3  | ETD                             | 5.38  | 1 (K)H Q T L\E\V S L\S R\D s\P\L\K(T)                               | S12 =n              | NP_116204.3    | NFATC2IP    |
| 677 | CG   | 4  | CID                             | 18.74 | 3 (E)L P M V E R Q/D t/D S C L/V Y G/G/Q/Q\M I L t/G Q N F\T\s E(S) | T9 =n,T23 =n,S29 =n | NP_036472.2    | NFATC2      |
| 678 | ET   | 4  | ETD                             | 16.77 | 1 (R)Q/Q y H N D m K E I R\K(K)                                     | Y3 =n               | NP_954983.1    | NEK5        |
| 679 | CL   | 3  | CID                             | 20.43 | 1 (K)A E/E/A/K/D\E P P/s E/G/E A E E E\E\K(D)                       | S10 =n              | NP_006149.1    | NEFL        |
| 680 | EL   | 3  | ETD                             | 14.13 | 1 (K)A/E E A K\D E P P s E G E A E E E E\K(D)                       | S10 =n              | NP_006149.1    | NEFL        |
| 681 | EG   | 3  | ETD                             | 13.32 | 1 (E)K/A K S\P V/P/K s/P\V\E\K(K)                                   | S9 =k,S4 =nf        | NP_005373.1    | NEF3        |
| 682 | EG   | 3  | ETD                             | 13.08 | 1 (E)K G K S P V P K s P\V\E\K(K)                                   | S9 =n               | NP_005373.1    | NEF3        |
| 683 | CG   | 3  | CID                             | 12.76 | 1 (E)K/G K S P V P/K s/P V E E(K)                                   | S9 =n               | NP_005373.1    | NEF3        |
| 684 | CG   | 3  | CID                             | 10.1  | 2 (E)K/G K s P V P\K s\P\V\E\K(K)                                   | S4 =n,S9 =n         | NP_005373.1    | NEF3        |
| 685 | EG   | 5  | ETD                             | 19.64 | 2 (E)L/V/A D A K V\E K P E K A/K s P/V P K s P V\E\K(K)             | S15 =k,S20 =k       | NP_005373.1    | NEF3        |
| 686 | CL   | 3  | CID                             | 19.84 | 2 (K)A K s/P/V P K s P V E A\K(S)                                   | S3 =n,S8 =n         | NP_005373.1    | NEF3        |
| 687 | EL   | 3  | ETD                             | 11.4  | 2 (K)A/K\s P\V P K/s P V E E\A\K(S)                                 | S3 =n,S8 =n         | NP_005373.1    | NEF3        |
| 688 | AL   | 3  | CID                             | 14.27 | 2 (K)A/K\s/P/V P K s P V E E K(G)                                   | S3 =k,S8 =k         | NP_005373.1    | NEF3        |
| 689 | ET   | 3  | ETD                             | 12.86 | 2 (K)A/K s P V P K\s P V E E\K(G)                                   | S3 =k,S8 =k         | NP_005373.1    | NEF3        |
| 690 | ET   | 4  | ETD                             | 10.12 | 1 (K)E/A/A E E K E E E P E A E E E E V A A K\K\s P V\K(A)           | S22 =k              | NP_005373.1    | NEF3        |
| 691 | ET   | 4  | ETD                             | 7.89  | 2 (K)E K E K\A G/G\E G G s\E/E/E G/s/D/K/G/A K(G)                   | S11 =n,S16 =n       | NP_005373.1    | NEF3        |
| 692 | AL   | 3  | CID                             | 17.48 | 2 (K)G K\s/P V P K\s/P V E E K(G)                                   | S3 =n,S8 =n         | NP_005373.1    | NEF3        |
| 693 | CT   | 3  | CID                             | 17.32 | 2 (K)G K s/P V P K\s/P V E E K(G)                                   | S3 =n,S8 =n         | NP_005373.1    | NEF3        |
| 694 | ET   | 3  | ETD                             | 15.19 | 1 (K)G K S P V P K/s P\V E E\K(G)                                   | S8 =n               | NP_005373.1    | NEF3        |
| 695 | AL   | 3  | ETD                             | 12.52 | 2 (K)G/K/s P V P K s/P V E E\K(G)                                   | S3 =n,S8 =n         | NP_005373.1    | NEF3        |
| 696 | CL   | 3  | CID                             | 10.49 | 1 (K)K A E s/P V K E E A V A E V V T I T\K(S)                       | S4 =k               | NP_005373.1    | NEF3        |
| 697 | EL   | 3  | ETD                             | 9.37  | 1 (K)K/A E s P V K E E A\V A E V V T I T\K(S)                       | S4 =k               | NP_005373.1    | NEF3        |
| 698 | CL   | 3  | CID                             | 17.48 | 1 (K)S P V P K s/P/V/E E A K(S)                                     | S6 =n               | NP_005373.1    | NEF3        |
| 699 | AL   | 3  | CID                             | 19.72 | 1 (K)S/P V P K s P\V/E E K(G)                                       | S6 =k,S1 =nf        | NP_005373.1    | NEF3        |
| 700 | CL   | 2  | CID                             | 17.2  | 1 (K)S P/V P K s/P V E E\K(G)                                       | S6 =k,S1 =nf        | NP_005373.1    | NEF3        |
| 701 | AL   | 3  | ETD                             | 13.44 | 1 (K)S P/V/P K s/P V E E\K(G)                                       | S6 =k,S1 =nf        | NP_005373.1    | NEF3        |
| 702 | ET   | 3  | ETD                             | 13.31 | 1 (K)S P V P K s P V E E\K(G)                                       | S6 =k,S1 =nf        | NP_005373.1    | NEF3        |

| #   | Exp. | CS | Number of phosphorylation sites |       | Sequence with fragments                                                       | Literature lookup | RefSeq#     | Gene Symbol |
|-----|------|----|---------------------------------|-------|-------------------------------------------------------------------------------|-------------------|-------------|-------------|
|     |      |    | Mode                            | Score |                                                                               |                   |             |             |
| 703 | EL   | 4  | ETD                             | 21.87 | 1 (K)N/R D/G/G/E R R P s S T S V P L\G\D\K(G)                                 | S10 =n            | NP_060138.1 | NDE1        |
| 704 | EL   | 4  | ETD                             | 13.38 | 2 (K)N R D/G G E R\R P s\s T S V P L G\D\K(G)                                 | S10 =n,S11 =n     | NP_060138.1 | NDE1        |
| 705 | ELX  | 5  | ETD                             | 13.58 | 2 (K)E R L M/R/s S T\D/S L P G P I s R Q P L\G\A\T S G A S L\K(T)             | S6 =n,S16 =n      | NP_066018.1 | NCOA5       |
| 706 | CG   | 2  | CID                             | 18.31 | 1 (E)I E/P/A A/m/K\A\A A A P A\s E(D)                                         | S15 =n            | NP_005372.2 | NCL         |
| 707 | CG   | 2  | CID                             | 22.74 | 1 (E)I/E/P/A/A m K A A A A P/A\s E D\E(D)                                     | S15 =n            | NP_005372.2 | NCL         |
| 708 | CG   | 2  | CID                             | 19.39 | 1 (E)I E/P/A A m K A A A A P A s E D E D D\E(D)                               | S15 =n            | NP_005372.2 | NCL         |
| 709 | AG   | 2  | CID                             | 14.85 | 1 (E)P/A A m K A\A A A A P A s E D\E(D)                                       | S13 =n            | NP_005372.2 | NCL         |
| 710 | CG   | 2  | CID                             | 12.63 | 1 (E)P/A A m K A A\A\A A P A\s E D E D D\E(D)                                 | S13 =n            | NP_005372.2 | NCL         |
| 711 | EG   | 5  | ETD                             | 24.1  | 1 (E)T/t P A K G K K A A K V V P V K A K N V A E D\E(D)                       | T2 =n             | NP_005372.2 | NCL         |
| 712 | CT   | 2  | CID                             | 12.01 | 1 (K)K/V/V V s/P\T\K(K)                                                       | S5 =k             | NP_005372.2 | NCL         |
| 713 | AL   | 5  | ETD                             | 25.17 | 1 (K)R/E I E/G R A I R L/E L/Q G P R G s P N A\R S Q\P S\K(T)                 | S18 =n            | NP_005372.2 | NCL         |
| 714 | ET   | 4  | ETD                             | 13.41 | 1 (R)A/I/R L E/L Q G P\R G s P N\A\R(S)                                       | S12 =n            | NP_005372.2 | NCL         |
| 715 | CT   | 3  | CID                             | 17.95 | 2 (K)R/K/P/s V P D\S A S/P/A D\D s/F\V D P G E R(L)                           | S4 =k,S15 =n      | NP_006144.1 | NCK1        |
| 716 | CT   | 2  | CID                             | 19.08 | 1 (R)L y D L N m P\A/Y\V\K(F)                                                 | Y2 =n             | NP_006144.1 | NCK1        |
| 717 | CT   | 3  | CID                             | 19.11 | 1 (K)D G A V/N/G/P S V/V G D Q/t/P I E P Q/T S I E R(L)                       | T14 =k            | NP_002473.2 | NASP        |
| 718 | CL   | 3  | CID                             | 22.08 | 1 (K)D G A/V/N/G/P/S/V/V/G\D Q t/P I/E/P Q T S I\E R L T E T K(D)             | T14 =k            | NP_002473.2 | NASP        |
| 719 | CL   | 4  | CID                             | 14.52 | 2 (K)E G E E T/E G s E/E D D/K E/N\D K\T E E M P N/D s V\L E N K(S)           | S8 =n,S25 =n      | NP_002473.2 | NASP        |
| 720 | AL   | 4  | CID                             | 10.88 | 2 (K)E G E E t E G s E E\D/D K E N\D\K/T E/E M/P N/D/S/V/L E N K(S)           | T5 =n,S8 =n       | NP_002473.2 | NASP        |
| 721 | CL   | 4  | CID                             | 10.09 | 1 (K)G G A A P E G P/N E\A E/V t/S/G K/P/E Q E\V P/D\A E E E K(S)             | T14 =n            | NP_002473.2 | NASP        |
| 722 | AL   | 4  | ETD                             | 21.2  | 1 (K)R/K P\E E E s P R K\D D\A\K(K)                                           | S7 =n             | NP_002473.2 | NASP        |
| 723 | CL   | 4  | CID                             | 18.81 | 1 (K)R R E F I T\G D V/E\P/T D A\E\S\E\W\H s E N E E E E\K(L)                 | S20 =k            | NP_005960.1 | NAP1L4      |
| 724 | EL   | 5  | ETD                             | 15.2  | 1 (K)R/R E F I T\G D V E\P T\D A A E S E\W\H s E/N\E E E E K(L)               | S20 =k            | NP_005960.1 | NAP1L4      |
| 725 | CL   | 5  | CID                             | 13.1  | 1 (K)R R E F I T\G D V E\P T D\A\E\S\E W\H\S E N E\E E E K L A G D M K s K(V) | S34 =n,S20 =nf    | NP_005960.1 | NAP1L4      |
| 726 | CG   | 2  | CID                             | 12.42 | 1 (E)Q s E L D/Q D L D D V\E\K(V)                                             | S2 =n             | NP_004528.1 | NAP1L1      |
| 727 | AG   | 2  | CID                             | 12.9  | 1 (E)R L D G L V E t/P T\G\Y I\E(S)                                           | T8 =k             | NP_004528.1 | NAP1L1      |
| 728 | CT   | 4  | CID                             | 16.48 | 1 (K)V Q G E A V\S N I Q/E N T Q T P T V/Q E E s E E E/E V/D/E T G\V/E\K(D)   | S22 =k            | NP_005585.1 | NACA        |
| 729 | ELX  | 3  | ETD                             | 8.32  | 1 (-)M L A S G s L G Q\K(F)                                                   | S6 =n             |             | N/A         |
| 730 | AL   | 4  | CID                             | 17.03 | 1 (-)m s H P I Q\N I N K/E/I\E I V E K N/Q I/E/I L E L K(S)                   | S2 =n             |             | N/A         |
| 731 | AG   | 3  | CID                             | 16.86 | 2 (E)A t/M t N I S G Q R m R\m G I/K N R N E\A\E(L)                           | T2 =n,T4 =n       |             | N/A         |
| 732 | AT   | 4  | CID                             | 15.01 | 1 (K)A Q/A A\D/Q/L A/S/Q\Q\s/G A R(L)                                         | S12 =n            |             | N/A         |
| 733 | ELX  | 5  | ETD                             | 13.78 | 1 (K)D/A/V S/T G/L/T/G A\V K L/A K G\T V Q/T G m D T t\K(T)                   | T25 =n            |             | N/A         |
| 734 | EL   | 5  | ETD                             | 12.55 | 1 (K)E/S E/D K P E/I\E D V G s D E E E E E K K D G D\K(K)                     | S13 =n            |             | N/A         |
| 735 | CL   | 3  | CID                             | 18.73 | 1 (K)E S K/D K/P/E I/E/D/V G/s/D/E/E E E\K(K)                                 | S13 =n            |             | N/A         |
| 736 | ELX  | 3  | ETD                             | 13.59 | 1 (K)E/S/K/D/K P E I E D V G s D E E E E\K(K)                                 | S13 =n            |             | N/A         |

| #   | Exp. | CS | Mode | Score | ▼ | Number of phosphorylation sites<br>Sequence with fragments                | Literature lookup     | RefSeq#     | Gene<br>Symbol |
|-----|------|----|------|-------|---|---------------------------------------------------------------------------|-----------------------|-------------|----------------|
| 737 | ELX  | 4  | ETD  | 27.61 | 1 | (K)E/S/K D K P E I E D V G s D E E E E K K(D)                             | S13 =n                |             | N/A            |
| 738 | AL   | 3  | CID  | 16.73 | 1 | (K)E S K D/K/P E I/E/D V/G s/D/E/E E E K K(D)                             | S13 =n                |             | N/A            |
| 739 | CT   | 4  | CID  | 12.01 | 1 | (K)E T F/P/R/D G L t/S P/T/P Q m G C W Q I(-)                             | T9 =n                 |             | N/A            |
| 740 | ELX  | 3  | ETD  | 8.28  | 1 | (K)S Q P L Q D y G/E E K K(R)                                             | Y7 =n                 |             | N/A            |
| 741 | AT   | 4  | CID  | 17.11 | 1 | (R)s C L Y G G G G Q/Y F A K P Q N/Q/G G Y/G/G/S/S/S/S/S/Y/G S G R(R)     | S1 =n                 |             | N/A            |
| 742 | ET   | 4  | ETD  | 17.67 | 1 | (R)V E E E E A S S K Q N m t K(R)                                         | T13 =n                |             | N/A            |
| 743 | EL   | 3  | ETD  | 10.65 | 3 | (K)L/D E E G s K C s I L s K(H)                                           | S6 =n,S9 =n,S12 =n    | NP_056275.2 | MYRIP          |
| 744 | CL   | 3  | CID  | 16.09 | 1 | (K)G A G D/G s/D/E E/V/D G K/A D G A/E/A K P A E(-)                       | S6 =k                 | NP_002464.1 | MYH9           |
| 745 | EL   | 3  | ETD  | 11.04 | 1 | (K)G/A G D G s D E E V D G K A D G A E A K P A E(-)                       | S6 =k                 | NP_002464.1 | MYH9           |
| 746 | EG   | 5  | ETD  | 12.44 | 1 | (E)G/s L E Q E K K V/R m/D/L E(R)                                         | S2 =n                 | NP_000248.1 | MYH6           |
| 747 | EL   | 5  | ETD  | 14    | 1 | (K)A E V P G A/T/G G D s P H L Q P/A E P P G E P R R E P/H P A E A E K(Q) | S11 =n                | NP_057216.2 | MYEF2          |
| 748 | EL   | 4  | ETD  | 21.48 | 1 | (K)R/R N s R D G D P L P S S L S C K(V)                                   | S4 =n                 | NP_002452.1 | MVD            |
| 749 | CL   | 4  | CID  | 17.36 | 2 | (K)Q G R/V H T S t t m T V/A I L P Q P t E I/N L V I N P K(D)             | T8 =n,T18 =n          | NP_061914.2 | MTRF1L         |
| 750 | ELX  | 3  | ETD  | 12.94 | 1 | (K)S/Q/E/P I P D D Q K V/s D D D K(E)                                     | S12 =n                | NP_848927.1 | MTDH           |
| 751 | ELX  | 3  | ETD  | 8.86  | 1 | (K)N/I/P/E/G s H Q Y E L L K(H)                                           | S6 =n                 | NP_060691.1 | MOBK11A        |
| 752 | CT   | 2  | CID  | 14.18 | 1 | (R)L A/I Q G P E/D s P S R(Q)                                             | S9 =k                 | NP_005430.1 | MLF2           |
| 753 | ET   | 4  | ETD  | 11.4  | 1 | (R)T V/R D s D/S G L E Q m/S I G H H I R(D)                               | S5 =n                 | NP_005430.1 | MLF2           |
| 754 | CL   | 2  | CID  | 20.97 | 1 | (K)s/Q V A E/L/N/D D/D/K/D D/E/I V F K(Q)                                 | S1 =n                 | NP_115766.2 | MKI67IP        |
| 755 | EL   | 3  | ETD  | 11.14 | 1 | (K)s Q V A E L N D D D K D D E I V F K(Q)                                 | S1 =n                 | NP_115766.2 | MKI67IP        |
| 756 | EL   | 4  | ETD  | 15.86 | 2 | (K)T/V D S Q G P t P V C T P t F L/E R R K(S)                             | T8 =k,T14 =n,T12 =nf  | NP_115766.2 | MKI67IP        |
| 757 | ELX  | 3  | ETD  | 13.84 | 2 | (K)A/m/H t P K P s V G E E K(D)                                           | T4 =n,S8 =n           | NP_002408.2 | MKI67          |
| 758 | ELX  | 4  | ETD  | 15.59 | 1 | (K)D/L Y T/T/G R R E s V N L G K(S)                                       | S10 =k                | NP_002408.2 | MKI67          |
| 759 | CT   | 3  | CID  | 10.32 | 2 | (K)I/A/C/K s P P P/E/S V D t/P T S T K(Q)                                 | S5 =k,T13 =k          | NP_002408.2 | MKI67          |
| 760 | ELX  | 4  | ETD  | 8.23  | 2 | (K)I/A C R s P Q P D P V G t P/T I/F K P Q S K(R)                         | S5 =k,T13 =k          | NP_002408.2 | MKI67          |
| 761 | ELX  | 4  | ETD  | 23.04 | 2 | (K)I/R E Q E P/A R R V s/R/S/s F S S D P D E K(A)                         | S11 =n,S14 =n         | NP_002408.2 | MKI67          |
| 762 | ET   | 3  | ETD  | 13.78 | 1 | (K)T P V Q Y S Q Q Q N s P Q K(H)                                         | S11 =k                | NP_002408.2 | MKI67          |
| 763 | CT   | 3  | CID  | 10.23 | 2 | (K)V/A C/K/S s Q/P D/L D K N/P A S s K(R)                                 | S6 =n,S17 =n          | NP_002408.2 | MKI67          |
| 764 | CT   | 2  | CID  | 12.58 | 1 | (R)s G A S E/A N L I V A K(S)                                             | S1 =k                 | NP_002408.2 | MKI67          |
| 765 | CL   | 3  | CID  | 21.96 | 1 | (K)T P/E/P/V/V P/T/A/P/E P/H/P T t S T D Q P V T P K(L)                   | T16 =n                | NP_055456.1 | MDC1           |
| 766 | AT   | 4  | ETD  | 19.46 | 1 | (R)K/R s L A T m D S P P H Q K(Q)                                         | S3 =n                 | NP_055456.1 | MDC1           |
| 767 | AT   | 4  | CID  | 15.42 | 1 | (R)K/R s L/A T m D S P P H Q K(Q)                                         | S3 =n                 | NP_055456.1 | MDC1           |
| 768 | CT   | 3  | CID  | 17.15 | 2 | (K)D/G D/S/Y/D P/Y D/F/s D t E/E/E/m P Q V H T P K(T)                     | S11 =n,T13 =k,T22 =nf | NP_002379.2 | MCM3           |
| 769 | ET   | 3  | ETD  | 22.27 | 1 | (R)G P/s L N P V L D Y D H/G S R(S)                                       | S3 =n                 | NP_061322.2 | MATR3          |
| 770 | AT   | 4  | CID  | 20.62 | 1 | (R)R D s/F/D D/R G P S L N P V L/D/Y/D/H G S R(S)                         | S3 =n                 | NP_061322.2 | MATR3          |

| #   | Exp. | CS | Mode | Number of phosphorylation sites |   | Sequence with fragments                                                              | Literature lookup                    | RefSeq#     | Gene Symbol |
|-----|------|----|------|---------------------------------|---|--------------------------------------------------------------------------------------|--------------------------------------|-------------|-------------|
|     |      |    |      | Score                           | ▼ |                                                                                      |                                      |             |             |
| 771 | ET   | 4  | ETD  | 16.64                           | 1 | (R)R/D s F/D D R G P S L N P V L D Y\D H\G\S\R(S)                                    | S3 =n                                | NP_061322.2 | MATR3       |
| 772 | ELX  | 3  | ETD  | 27.18                           | 1 | (K)A P/R G D V T A E\E A A G A s P\A\K(A)                                            | S15 =k                               | NP_075385.1 | MARCKSL1    |
| 773 | ELX  | 4  | ETD  | 15.61                           | 1 | (K)A P/R G D V/T/A/E/E\A/A G A s P/A/K A N G Q\E N G H\V\K(S)                        | S15 =k                               | NP_075385.1 | MARCKSL1    |
| 774 | ELX  | 4  | ETD  | 19.98                           | 1 | (K)E G G G/D S S A S S P t E E E Q/E Q G E I G A C\S D E G T A Q E G<br>K(A)         | T12 =n,S10 =nf,S25 =nf               | NP_075385.1 | MARCKSL1    |
| 775 | ELX  | 4  | ETD  | 9.63                            | 2 | (K)E G G G/D s/S A S S P t E\E E Q/E Q G E I G A C S D E G T A Q E G<br>K(A)         | S6 =n,T12 =n,S10 =nf,S25 =nf         | NP_075385.1 | MARCKSL1    |
| 776 | ELX  | 4  | ETD  | 7.77                            | 1 | (K)E G G G/D S S/A S S P T E E\E\Q E Q G E/I G A C s\D E\G/T A Q E G<br>K(A)         | S25 =k,S10 =nf                       | NP_075385.1 | MARCKSL1    |
| 777 | ELX  | 4  | ETD  | 15.62                           | 1 | (K)G A E A S A/A/S E E/E A G P Q A T E P S t P S G P E S\G P T P<br>A/S A E Q N\E(-) | T21 =k,S5 =nf,S8 =nf,S23 =nf         | NP_075385.1 | MARCKSL1    |
| 778 | ELX  | 4  | ETD  | 14                              | 1 | (K)G A E A S A/A S E E/E A G P Q\A t E P\S T P S G P E/S\G P T P<br>A S A E Q N\E(-) | T17 =n,S5 =nf,S8 =nf,T21 =nf,S23 =nf | NP_075385.1 | MARCKSL1    |
| 779 | ELX  | 3  | ETD  | 9.5                             | 1 | (K)G E/V P P K E t P\K(K)                                                            | T8 =n                                | NP_075385.1 | MARCKSL1    |
| 780 | ELX  | 3  | ETD  | 10.49                           | 1 | (K)G E/V P/P K/E t P K\K(K)                                                          | T8 =n                                | NP_075385.1 | MARCKSL1    |
| 781 | ELX  | 3  | ETD  | 17.87                           | 2 | (K)K P F K L s G L s F\K(R)                                                          | S6 =n,S9 =k                          | NP_075385.1 | MARCKSL1    |
| 782 | ELX  | 3  | ETD  | 14.78                           | 2 | (K)P/F K L s G L s F\K(R)                                                            | S5 =n,S8 =k                          | NP_075385.1 | MARCKSL1    |
| 783 | ELX  | 3  | ETD  | 23.2                            | 1 | (K)A/E/D/G A T P S\P/S N E t P\K\K(K)                                                | T13 =k                               | NP_002347.4 | MARCKS      |
| 784 | ELX  | 3  | ETD  | 17.85                           | 2 | (K)A/E/D/G A T P s P\S N E t P K\K(K)                                                | S8 =n,T13 =k                         | NP_002347.4 | MARCKS      |
| 785 | ELX  | 3  | ETD  | 7.38                            | 1 | (K)A/E/D/G A T P s P S N E\T P K\K(K)                                                | S8 =n,T13 =nf                        | NP_002347.4 | MARCKS      |
| 786 | ELX  | 3  | ETD  | 23.04                           | 1 | (K)G/E/A/A/A/E R P G E A A V A S S P s\K(A)                                          | S18 =n,S16 =nf                       | NP_002347.4 | MARCKS      |
| 787 | ELX  | 4  | ETD  | 11.33                           | 1 | (K)G E A A A E R P G E\A\A\A S s/P S K A N\G Q\E N G H V\K(V)                        | S16 =k                               | NP_002347.4 | MARCKS      |
| 788 | ELX  | 3  | ETD  | 17.74                           | 2 | (K)s F K L s G F S F\K(K)                                                            | S1 =k,S5 =k,S8 =nf                   | NP_002347.4 | MARCKS      |
| 789 | ELX  | 3  | ETD  | 15.02                           | 2 | (K)S/F K\L s G F s F\K(K)                                                            | S5 =k,S8 =k,S1 =nf                   | NP_002347.4 | MARCKS      |
| 790 | ELX  | 3  | ETD  | 16.67                           | 3 | (K)s/F K L s G\F s F K\K(N)                                                          | S1 =k,S5 =k,S8 =k                    | NP_002347.4 | MARCKS      |
| 791 | ELX  | 3  | ETD  | 13.73                           | 2 | (K)s/F/K/L/s\G F S F K\K(N)                                                          | S1 =k,S5 =k,S8 =nf                   | NP_002347.4 | MARCKS      |
| 792 | ELX  | 3  | ETD  | 9.38                            | 1 | (K)T/A/A/K\G/E A A A/E R P G E A\A V A s/S P S\K(A)                                  | S19 =n,S20 =nf                       | NP_002347.4 | MARCKS      |
| 793 | ELX  | 4  | ETD  | 8.35                            | 1 | (K)T/A A K G/E A A A E R P G E\A\A V A S\ S P s K(A)                                 | S22 =n,S20 =nf                       | NP_002347.4 | MARCKS      |
| 794 | ELX  | 4  | ETD  | 6.72                            | 2 | (K)s/K\D G\t G\S\D/D K/K/A K\G/A D G/K/T K(I)                                        | S1 =n,T5 =n                          | NP_058525.1 | MAPT        |
| 795 | ELX  | 3  | ETD  | 17.28                           | 2 | (K)V/A/V V R t P P K s P S S\A\K(S)                                                  | T6 =k,S10 =k,S12 =nf,S13 =nf         | NP_005901.2 | MAPT        |
| 796 | ET   | 4  | ETD  | 22.54                           | 2 | (K)S/S P\A A K P/G S T P/s R P S s A K\R(A)                                          | S12 =n,S16 =n                        | NP_055083.1 | MAPRE2      |
| 797 | EL   | 4  | ETD  | 25.64                           | 1 | (K)K P L T/s/S\A A P Q R\ P I S T Q R T A A A P\K(A)                                 | S5 =n                                | NP_036457.1 | MAPRE1      |
| 798 | EL   | 4  | ETD  | 24.58                           | 2 | (K)K P L T s S S A A P Q R\ P I S t Q R T A A A P\K(A)                               | S5 =n,T16 =n                         | NP_036457.1 | MAPRE1      |
| 799 | AL   | 4  | ETD  | 9.47                            | 1 | (K)S G L\Q I K K/N/A/I/I/D D y K(V)                                                  | Y14 =n                               | NP_004750.1 | MAPKAPK2    |
| 800 | AG   | 2  | CID  | 14.18                           | 2 | (E)A L N s/P H\S E\ S F\V S P\E(A)                                                   | S4 =n,S9 =n                          | NP_002366.2 | MAP4        |
| 801 | AG   | 2  | CID  | 13.07                           | 1 | (E)A L/N S P H\S E s F V S P\E(A)                                                    | S9 =n                                | NP_002366.2 | MAP4        |
| 802 | AG   | 2  | CID  | 20.14                           | 1 | (E)m/A/L G/K/D\V t P/P/P\E\T\E(V)                                                    | T8 =k                                | NP_002366.2 | MAP4        |



| #   | Exp. | CS | Number of phosphorylation sites |       | Sequence with fragments                                                       | Literature lookup    | RefSeq#     | Gene Symbol |
|-----|------|----|---------------------------------|-------|-------------------------------------------------------------------------------|----------------------|-------------|-------------|
|     |      |    | Mode                            | Score |                                                                               |                      |             |             |
| 803 | EG   | 3  | ETD                             | 17.59 | 1 (E)V/A/L A K D m E s P T K\L\D(V)                                           | S9 =k                | NP_002366.2 | MAP4        |
| 804 | EG   | 4  | ETD                             | 22.95 | 1 (E)V/A/L A K D m E S\p t K L D V\T L A\K D\m\Q P S m\E(S)                   | T11 =n,S9 =nf        | NP_002366.2 | MAP4        |
| 805 | AG   | 3  | CID                             | 16.29 | 1 (E)V/A L A K D m E\s P/T K L D\V\T/L A K D\m\Q P S m E(S)                   | S9 =k                | NP_002366.2 | MAP4        |
| 806 | AG   | 2  | CID                             | 15.38 | 1 (E)V/G L L K D m s/P L S E(T)                                               | S8 =k                | NP_002366.2 | MAP4        |
| 807 | CG   | 2  | CID                             | 16.41 | 1 (E)V G L L/K D m s P L\S\E\T\E(M)                                           | S8 =k                | NP_002366.2 | MAP4        |
| 808 | AL   | 3  | ETD                             | 8.23  | 1 (K)A/T P/M P S R/P\s T T P F/I D\K(K)                                       | S9 =n                | NP_002366.2 | MAP4        |
| 809 | ET   | 3  | ETD                             | 24.07 | 1 (K)D/m E s P T K L D V T L\A\K(D)                                           | S4 =k                | NP_002366.2 | MAP4        |
| 810 | EL   | 3  | ETD                             | 21.39 | 1 (K)D/M E s P\T K L D V T L\A\K(D)                                           | S4 =k                | NP_002366.2 | MAP4        |
| 811 | AT   | 3  | CID                             | 16.99 | 1 (K)D/m E/s P/T/K L/D V/T L A K(D)                                           | S4 =k                | NP_002366.2 | MAP4        |
| 812 | CT   | 3  | CID                             | 14.32 | 1 (K)D M E/s P/T K L D V/T L A K(D)                                           | S4 =k                | NP_002366.2 | MAP4        |
| 813 | CT   | 3  | CID                             | 13.48 | 1 (K)D m E/S P/t/K L/D/V/T L A K(D)                                           | T6 =n,S4 =nf         | NP_002366.2 | MAP4        |
| 814 | ET   | 3  | ETD                             | 15.33 | 1 (K)E/T/E/R\A s\p I K m D L A P\S\K(D)                                       | S6 =n                | NP_002366.2 | MAP4        |
| 815 | AT   | 3  | CID                             | 13.8  | 1 (K)E T/E/R A\s/P I/K/m D L/A/P S\K(D)                                       | S6 =n                | NP_002366.2 | MAP4        |
| 816 | CT   | 3  | CID                             | 13.12 | 1 (K)E T/E/R A\s/P I/K/m/D L/A/P S\K(D)                                       | S6 =n                | NP_002366.2 | MAP4        |
| 817 | ET   | 4  | ETD                             | 9.1   | 1 (K)E T/E R/A/s\p I K\M D L A P S\K(D)                                       | S6 =n                | NP_002366.2 | MAP4        |
| 818 | CL   | 4  | CID                             | 14.41 | 1 (K)G I S E D S H L\E s L Q/D V G/Q S A A/P T F M I/S/P E T V\T G T G K K(C) | S10 =n               | NP_002366.2 | MAP4        |
| 819 | CL   | 3  | CID                             | 10.8  | 1 (K)K C s/L P A E E D S V/L E\K(L)                                           | S3 =n                | NP_002366.2 | MAP4        |
| 820 | CT   | 3  | CID                             | 12.49 | 1 (K)K P m/S L\A s G L V P/A A P P K(R)                                       | S7 =n                | NP_002366.2 | MAP4        |
| 821 | AT   | 5  | CID                             | 13.35 | 3 (K)K P m S L A\S\G L V P A A\p/P K R/P A/V A s/A R P s/I/L P s K(D)         | S22 =n,S26 =n,S30 =n | NP_002366.2 | MAP4        |
| 822 | ELX  | 3  | ETD                             | 18.64 | 1 (K)K/V s Y S H I Q S\K(C)                                                   | S3 =n                | NP_002366.2 | MAP4        |
| 823 | ELX  | 3  | ETD                             | 11.88 | 1 (K)K V s Y S H I Q S\K(C)                                                   | S3 =n                | NP_002366.2 | MAP4        |
| 824 | ET   | 3  | ETD                             | 7.63  | 3 (K)T/E V A L/A/K D M E s/P t K/L D V t L/A K(D)                             | S11 =k,T13 =n,T18 =n | NP_002366.2 | MAP4        |
| 825 | AL   | 3  | CID                             | 18.78 | 1 (K)T T/T/A/A/V/A S T G/P/S S R S P S t L L\p K(K)                           | T19 =n,S16 =nf       | NP_002366.2 | MAP4        |
| 826 | CT   | 3  | CID                             | 14.11 | 1 (K)T T/T/A/A/V/A S T G/P/S S R S P/s T L L\p K(K)                           | S18 =n,S16 =nf       | NP_002366.2 | MAP4        |
| 827 | AT   | 2  | CID                             | 11.53 | 1 (R)L A/t/N/T/S/A P D L K(N)                                                 | T3 =n,S6 =nf         | NP_002366.2 | MAP4        |
| 828 | EG   | 5  | ETD                             | 12.44 | 1 (S)N A\V T\K T\A/G\p I\A S A/Q K Q P A G\K\V Q I/V/S/K K V s y S(H)         | Y30 =n               | NP_002366.2 | MAP4        |
| 829 | EL   | 3  | ETD                             | 7.45  | 2 (K)E/L/E/A E R\s L\m S s P E D L\T\K(D)                                     | S7 =n,S11 =n         | NP_005900.1 | MAP1B       |
| 830 | CL   | 2  | CID                             | 13.4  | 1 (K)G E A E Q/s/E/E/E A D E E D K(A)                                         | S6 =n                | NP_005900.1 | MAP1B       |
| 831 | AL   | 4  | CID                             | 13.15 | 2 (K)Q V s S\L\s/S\G V I Q\E A L A/T N m K(L)                                 | S3 =n,S6 =n          | NP_036222.3 | MACF1       |
| 832 | EL   | 3  | ETD                             | 11.1  | 2 (K)A I/G/A/L/A\S s R R/S\s S E G\L S\K(G)                                   | S8 =n,S12 =n         | NP_361013.2 | LUZP1       |
| 833 | ET   | 3  | ETD                             | 13.17 | 1 (R)A/m/L/D/Q\L m G t\s R\D G D T T\R(Q)                                     | T9 =n                | NP_057103.1 | LUC7L2      |
| 834 | ET   | 5  | ETD                             | 16.14 | 2 (R)F/R D Q\D/L A S\C D R D R\S\s R D R\s P\R(D)                             | S15 =n,S19 =n        | NP_057103.1 | LUC7L2      |
| 835 | CL   | 2  | CID                             | 15.87 | 1 (K)S Q/D\V A V s/P/Q/Q/Q Q/C S K(S)                                         | S7 =n                | NP_079359.2 | LSM16       |
| 836 | EG   | 3  | ETD                             | 13    | 1 (E)L/N A L K S T/G D/G\T L G R\A S\E(V)                                     | T11 =n               | NP_004726.1 | LRRFIP1     |
| 837 | AL   | 5  | CID                             | 15.54 | 1 (K)T D y T\H\A\N/L/V/D/K A L/Q/L L K(E)                                     | Y3 =n                | NP_060879.2 | LRP2BP      |

| #   | Exp. | CS | Number of phosphorylation sites |       | Sequence with fragments                                       | Literature lookup    | RefSeq#     | Gene Symbol |
|-----|------|----|---------------------------------|-------|---------------------------------------------------------------|----------------------|-------------|-------------|
|     |      |    | Mode                            | Score |                                                               |                      |             |             |
| 838 | ET   | 4  | ETD                             | 10.22 | 1 (R)N/L/t/P/G G K D S\A A/R\S L\N\K(L)                       | T3 =n                | NP_056051.1 | LPHN3       |
| 839 | AL   | 3  | CID                             | 8.65  | 2 (K)S R Q P s/y V P/A P/L\R K\K(K)                           | S5 =n,Y6 =n          | NP_005349.3 | LMO7        |
| 840 | AT   | 2  | CID                             | 14.26 | 1 (R)A/G/G/P/T/T P\L s/P T R(L)                               | S9 =k,T6 =nf         | NP_005564.1 | LMNB1       |
| 841 | CT   | 2  | CID                             | 16.11 | 1 (R)S G A Q/A S S T P/L/s/P T R(I)                           | S11 =k,T8 =nf        | CAA27173.1  | LMNA        |
| 842 | ET   | 4  | ETD                             | 22.2  | 1 (R)m G P S G E G m/E\P/E/R R D\s Q D\G\S/S\Y\R(R)           | S16 =k               | AAH07560.1  | LASP1       |
| 843 | AG   | 3  | CID                             | 13.04 | 2 (E)Q m/D/G/R\K/N\t F t/A W S\D\E(E)                         | T8 =n,T10 =n         | NP_056130.2 | LARP1       |
| 844 | AG   | 4  | CID                             | 10.01 | 2 (E)S R F s H L T S L/P Q\Q L P S Q/Q L M s K/D\Q D E Q E(E) | S4 =n,S20 =n         | NP_056130.2 | LARP1       |
| 845 | AG   | 3  | CID                             | 17.44 | 3 (E)T E/s/A/P/G\s P/R A V/t P V/P T K T E\E(V)               | S3 =n,S7 =n,T12 =n   | NP_056130.2 | LARP1       |
| 846 | AL   | 3  | CID                             | 15.08 | 3 (K)E T E/s/A/P G s/P/R A/V t/P V/P\T K(T)                   | S4 =n,S8 =n,T13 =n   | NP_056130.2 | LARP1       |
| 847 | EL   | 3  | ETD                             | 7.84  | 3 (K)E/T/E/s A P G s P R A/V t P V P\T\K(T)                   | S4 =n,S8 =n,T13 =n   | NP_056130.2 | LARP1       |
| 848 | ET   | 3  | ETD                             | 8.77  | 2 (R)T/P R t P R t P Q L\K(D)                                 | T4 =n,T7 =n          | NP_056130.2 | LARP1       |
| 849 | CT   | 4  | CID                             | 14.48 | 2 (R)Q L R\E y Q\E L M s V\K(L)                               | Y5 =n,S10 =n         | NP_005547.3 | KRT7        |
| 850 | CT   | 2  | CID                             | 20.3  | 1 (K)M I G F P/S/S A G S V/s/P R(S)                           | S12 =n               | NP_705694.1 | KRT13       |
| 851 | CT   | 4  | CID                             | 16.41 | 2 (R)m S G E C A P N V/s/V\S V S/t\S H T/T/I S G G G S\R(G)   | S10 =n,T15 =n        | NP_006112.2 | KRT1        |
| 852 | ELX  | 3  | ETD                             | 18.79 | 1 (K)T/N L S/G R Q s P S F\K(L)                               | S8 =n                | AAH72409.1  | KIAA2010    |
| 853 | ET   | 4  | ETD                             | 10.72 | 1 (K)V/Q/T L S N Q P L L K\s\p A\p P/L\H V A\A L G\Q\K(Q)     | S12 =n               | NP_066997.3 | KIAA1967    |
| 854 | ELX  | 4  | ETD                             | 22.61 | 1 (K)K/K P/N\E/D E V\N Q D s/V K\K(N)                         | S12 =n               | NP_065747.1 | KIAA1143    |
| 855 | ELX  | 5  | ETD                             | 26.64 | 1 (K)R I/Q P/Q/P P D E\D G D/H\s D K/E\D E\Q P Q V V L\K(K)   | S14 =n               | NP_065747.1 | KIAA1143    |
| 856 | ELX  | 4  | ETD                             | 17.86 | 2 (K)D/R K\T s A V s S P L/L D Q Q R/N\S\K(T)                 | S5 =n,S8 =n,S9 =nf   | NP_055885.2 | KIAA0853    |
| 857 | AL   | 3  | ETD                             | 15.96 | 1 (K)V/V T Q R s E I G E\K(Q)                                 | S6 =n                | NP_055627.1 | KIAA0470    |
| 858 | ET   | 5  | ETD                             | 24.48 | 1 (R)K P L T/T S G F\H H/S\E E\G\T\S S S G\s\K\R(W)           | S20 =n               | NP_055627.1 | KIAA0470    |
| 859 | ET   | 4  | ETD                             | 11.33 | 2 (R)K P/L T/T s G/F H H S E E\G T/S S S G s K\R(W)           | S6 =n,S20 =n         | NP_055627.1 | KIAA0470    |
| 860 | ET   | 3  | ETD                             | 15.98 | 2 (R)L G/s/L S/A R s D S E A T I S\R(S)                       | S3 =k,S8 =n          | NP_055627.1 | KIAA0470    |
| 861 | EL   | 5  | ETD                             | 11.99 | 2 (K)K/K C H K Q A L V G s D/s A E D E K R K R\K(C)           | S11 =n,S13 =n        | NP_056139.1 | KIAA0409    |
| 862 | CT   | 3  | CID                             | 13.35 | 1 (K)I G G D A A T/T V N/N S t/P D F/G F G\G Q K(R)           | T13 =n               | NP_003676.1 | KHSRP       |
| 863 | CT   | 2  | CID                             | 16.76 | 1 (R)S/G/s/M/D P S G/A/H P S V R(Q)                           | S3 =k                | NP_006550.1 | KHDRBS1     |
| 864 | ET   | 3  | ETD                             | 14.9  | 1 (R)S/G/s/M D P S\G A/H P S\V\R(Q)                           | S3 =k                | NP_006550.1 | KHDRBS1     |
| 865 | ET   | 3  | ETD                             | 24.87 | 1 (R)S P/S/G G A\A G P L L T P S Q s L D G S\R(R)             | S16 =n,S3 =nf        | NP_612453.1 | KCTD12      |
| 866 | ET   | 3  | ETD                             | 23.21 | 1 (R)s P/S G G A\A G P L L T P S Q s L D G S\R(R)             | S1 =n,S3 =nf         | NP_612453.1 | KCTD12      |
| 867 | AT   | 3  | CID                             | 22.89 | 3 (R)S P s G G A G/P L L t/P/s Q/S/L/D/G S R(R)               | S3 =k,T12 =n,S14 =n  | NP_612453.1 | KCTD12      |
| 868 | AT   | 3  | CID                             | 22.64 | 2 (R)S P S G G A G P L L t/P/s Q/S L/D/G S R(R)               | T12 =n,S14 =n,S3 =nf | NP_612453.1 | KCTD12      |
| 869 | CT   | 3  | CID                             | 22.49 | 1 (R)S P S G G A A G P L L T P/S Q\s L/D/G S R(R)             | S16 =n,S3 =nf        | NP_612453.1 | KCTD12      |
| 870 | AT   | 3  | CID                             | 22.25 | 2 (R)s/P S G G A/A G/P L L T P/s Q/S/L/D/G S\R(R)             | S1 =n,S14 =n,S3 =nf  | NP_612453.1 | KCTD12      |
| 871 | CT   | 3  | CID                             | 21.29 | 2 (R)S P S G G A G P L L t/P/s Q/s/L/D G S R(R)               | T12 =n,S16 =n,S3 =nf | NP_612453.1 | KCTD12      |
| 872 | ET   | 3  | ETD                             | 20.88 | 2 (R)S P/S G G A A\G P L L t/P S Q/s L D G S\R(R)             | T12 =n,S16 =n,S3 =nf | NP_612453.1 | KCTD12      |

| #   | Exp. | CS | Number of phosphorylation sites |       | Sequence with fragments | Literature lookup                                                               | RefSeq#                    | Gene        |         |
|-----|------|----|---------------------------------|-------|-------------------------|---------------------------------------------------------------------------------|----------------------------|-------------|---------|
|     |      |    | Mode                            | Score |                         |                                                                                 |                            | ▼           | Symbol  |
| 873 | AT   | 3  | ETD                             | 17.66 | 2                       | (R)S P S G G A A\G/P L\L T/P s Q s L D G S\R(R)                                 | S14 =n,S16 =n,S3 =nf       | NP_612453.1 | KCTD12  |
| 874 | CT   | 2  | CID                             | 17.09 | 1                       | (R)S P S G G/A A/G/P L L t/P S Q S L D/G S R(R)                                 | T12 =n,S3 =nf              | NP_612453.1 | KCTD12  |
| 875 | CT   | 2  | CID                             | 16.2  | 2                       | (R)S P S G G A A/G/P/L/L t/P S Q s\L D/G S R(R)                                 | T12 =n,S16 =n,S3 =nf       | NP_612453.1 | KCTD12  |
| 876 | AT   | 3  | ETD                             | 15.96 | 1                       | (R)S P/S/G/G\A A G P L L T P S Q s\L/D G S\R(R)                                 | S16 =n,S3 =nf              | NP_612453.1 | KCTD12  |
| 877 | AT   | 2  | CID                             | 15.31 | 2                       | (R)s P/S G G A/A/G/P/L/L/T/P/S Q s L D G S\R(R)                                 | S1 =n,S16 =n,S3 =nf        | NP_612453.1 | KCTD12  |
| 878 | AT   | 3  | ETD                             | 10.63 | 3                       | (R)S P/s G G A A G P L L T P s\Q s\L D G S\R(R)                                 | S3 =k,S14 =n,S16 =n        | NP_612453.1 | KCTD12  |
| 879 | AT   | 3  | CID                             | 15.34 | 2                       | (R)S P/S/G/G/A/A/G/P/L L\T/P/S Q S L D\G s R R(S)                               | T12 =n,S20 =n,S3 =nf       | NP_612453.1 | KCTD12  |
| 880 | CT   | 3  | CID                             | 14.59 | 3                       | (R)s P S/G/G/A/A/G/P/L/L/t/P/S Q s L D G S R R(S)                               | S1 =n,T12 =n,S16 =n,S3 =nf | NP_612453.1 | KCTD12  |
| 881 | ET   | 3  | ETD                             | 6.05  | 2                       | (R)S P/S/G/G/A A G P L L t\p s Q S L D\G\S R\R(S)                               | T12 =n,S14 =n,S3 =nf       | NP_612453.1 | KCTD12  |
| 882 | ET   | 5  | ETD                             | 11.75 | 2                       | (R)L A\R I\R\V A\K\T/G S S N/A/y/L H S K(R)                                     | T9 =n,Y15 =n               | NP_004971.2 | KCND3   |
| 883 | ET   | 4  | ETD                             | 10.15 | 1                       | (R)G S Q/E D\L\E\A R/N G/t S/P/S R(G)                                           | T12 =n                     | NP_063945.2 | INPP5E  |
| 884 | EL   | 3  | ETD                             | 6.33  | 1                       | (K)D K M E G s D F E S\S G G\R\G\L\K(K)                                         | S6 =n                      | NP_115705.2 | ING5    |
| 885 | ET   | 3  | ETD                             | 21.95 | 1                       | (K)R P m E E D G E E/K s P S K(K)                                               | S11 =k                     | NP_004507.2 | ILF3    |
| 886 | ET   | 3  | ETD                             | 17.6  | 1                       | (K)R P m E E D/G E E/K s P S K(K)                                               | S11 =k                     | NP_004507.2 | ILF3    |
| 887 | EL   | 3  | ETD                             | 16.33 | 1                       | (K)R P M E E D G/E E K\s P S\K(K)                                               | S11 =k                     | NP_004507.2 | ILF3    |
| 888 | CL   | 3  | CID                             | 12.34 | 1                       | (K)R P\M E E D G E E K\s/P S\K(K)                                               | S11 =k                     | NP_004507.2 | ILF3    |
| 889 | AL   | 3  | ETD                             | 11.28 | 1                       | (K)R P m E E D G/E E K S P s\K(K)                                               | S13 =n,S11 =nf             | NP_004507.2 | ILF3    |
| 890 | ELX  | 4  | ETD                             | 8.02  | 2                       | (K)E L/E/E/N/D/s E N\S\E\F\E D D/G\s E/K V L D\E\E\G(S)                         | S7 =n,S17 =n               | NP_055315.2 | HTATSF1 |
| 891 | ELX  | 4  | ETD                             | 26.4  | 1                       | (K)E/S/E E/G N P V R G S E E D s P K\K(E)                                       | S15 =n                     | NP_055315.2 | HTATSF1 |
| 892 | CT   | 2  | CID                             | 12.78 | 1                       | (K)L/F E D D D/s N E K(L)                                                       | S7 =k                      | NP_055315.2 | HTATSF1 |
| 893 | EL   | 3  | ETD                             | 14.3  | 1                       | (K)L/F/E\E s D D K E D E D A D G\K(E)                                           | S5 =n                      | NP_055315.2 | HTATSF1 |
| 894 | AL   | 4  | ETD                             | 24.64 | 1                       | (K)L/F/E E s D D K E D\E D/A/D G\K E V\E D\A D/E\K(L)                           | S5 =n                      | NP_055315.2 | HTATSF1 |
| 895 | CL   | 2  | CID                             | 14.02 | 1                       | (K)V/F D D\E/s D E K(E)                                                         | S6 =k                      | NP_055315.2 | HTATSF1 |
| 896 | AL   | 3  | CID                             | 17.33 | 1                       | (K)V/F D/D/E/s D/E/K E/D E E/Y A D E K(G)                                       | S6 =k                      | NP_055315.2 | HTATSF1 |
| 897 | EL   | 3  | ETD                             | 10.92 | 1                       | (K)V/F/D/D E s D E K E D E Y A D E\K(G)                                         | S6 =k                      | NP_055315.2 | HTATSF1 |
| 898 | CT   | 2  | CID                             | 13.33 | 1                       | (K)V/L D E\E G/s/E R(E)                                                         | S7 =n                      | NP_055315.2 | HTATSF1 |
| 899 | ELX  | 4  | ETD                             | 14.85 | 2                       | (K)V/L D E\E G s E R/E F D E D s\D E/K E E\E\E/D T Y E\K(V)                     | S7 =n,S15 =k               | NP_055315.2 | HTATSF1 |
| 900 | AG   | 4  | ETD                             | 12.51 | 1                       | (E)L/N\N T\C E/P/V V/T Q\p K P\K/I\E\s P/R/L\E(R)                               | S18 =k                     | NP_006635.2 | HSPH1   |
| 901 | ET   | 3  | ETD                             | 9.87  | 1                       | (K)I/E s P K L E\R(T)                                                           | S3 =k                      | NP_006635.2 | HSPH1   |
| 902 | AL   | 3  | CID                             | 14.17 | 1                       | (K)I E/s/P K/L/E/R T/P\N G P N\I D\K(K)                                         | S3 =k                      | NP_006635.2 | HSPH1   |
| 903 | AL   | 4  | ETD                             | 13    | 1                       | (K)I/E s P K/L/E R\T/P N/G P N I D\K(K)                                         | S3 =k                      | NP_006635.2 | HSPH1   |
| 904 | EL   | 5  | ETD                             | 17.03 | 1                       | (K)I/E\s P K/L E\R/T P N G P N I D\K\K\E/E\D\L E\D\K(N)                         | S3 =k                      | NP_006635.2 | HSPH1   |
| 905 | CL   | 4  | CID                             | 19.37 | 1                       | (K)N V Q Q D N S E\A G T Q P Q V/Q T/D A\Q/Q/T S Q S P/P s P E L/T/S E E N\K(I) | S28 =k                     | NP_006635.2 | HSPH1   |
| 906 | ELX  | 4  | ETD                             | 20.46 | 1                       | (K)E/E/E\D K D/D E E\K\P K/I E D V G s D\E E D D S G\K(D)                       | S18 =k,S24 =nf             | NP_031381.2 | HSPCB   |

| #   | Exp. | CS | Mode | Number of phosphorylation sites |   | Sequence with fragments                                               | Literature lookup | RefSeq#        | Gene      |
|-----|------|----|------|---------------------------------|---|-----------------------------------------------------------------------|-------------------|----------------|-----------|
|     |      |    |      | Score                           | ▼ |                                                                       |                   |                | Symbol    |
| 907 | ELX  | 5  | ETD  | 22.25                           | 1 | (K)E/E E D K D/D E E K P K I E D/V G s D E E D D S G K D K(K)         | S18 =k            | NP_031381.2    | HSPCB     |
| 908 | AL   | 2  | CID  | 10.81                           | 1 | (K)E I s D/D E/A E/E E K(G)                                           | S3 =n             | NP_031381.2    | HSPCB     |
| 909 | ELX  | 3  | ETD  | 20.36                           | 1 | (K)E/I s D D E A E E E K G E K(E)                                     | S3 =n             | NP_031381.2    | HSPCB     |
| 910 | ELX  | 4  | ETD  | 30.76                           | 1 | (K)E/I s D D E A E E E K G E K E E E D K(D)                           | S3 =n             | NP_031381.2    | HSPCB     |
| 911 | ELX  | 5  | ETD  | 21.19                           | 1 | (K)E I s D/D E A E E E K G E K E E E D K D D E E K(P)                 | S3 =n             | NP_031381.2    | HSPCB     |
| 912 | ELX  | 5  | ETD  | 20.52                           | 1 | (K)E I s D D E A E/E E K G E K E E E D K D D E E K P K(I)             | S3 =n             | NP_031381.2    | HSPCB     |
| 913 | CT   | 4  | CID  | 11.83                           | 1 | (K)K S Q I F S T A S D N Q P T V T I K V y E G E R P L T K(D)         | Y20 =n            | NP_005338.1    | HSPA5     |
| 914 | CL   | 3  | CID  | 27.79                           | 1 | (K)E L E Q V C N P I I I S G L y Q G A G G P G G F G A Q G P K(G)     | Y14 =n            | NP_005336.2    | A1B       |
| 915 | ELX  | 4  | ETD  | 13.52                           | 1 | (K)D/D E E K P K I E D V G s D E E D D S G K(D)                       | S13 =k,S19 =nf    | NP_001014390.1 | HSPCB     |
| 916 | AL   | 2  | CID  | 19.28                           | 1 | (K)I E D V G s D E E D D S G K(D)                                     | S6 =k,S12 =nf     | NP_001014390.1 | HSPCB     |
| 917 | AL   | 2  | ETD  | 12.39                           | 1 | (K)I E D V G s D E E D D S G K(D)                                     | S6 =k,S12 =nf     | NP_001014390.1 | HSPCB     |
| 918 | ELX  | 3  | ETD  | 20.74                           | 1 | (K)I E D V G s D E E D D S G K D K(K)                                 | S6 =k,S12 =nf     | NP_001014390.1 | HSPCB     |
| 919 | AL   | 3  | CID  | 9.5                             | 1 | (K)I E D V G s D E E D D S G K D K(K)                                 | S6 =k,S12 =nf     | NP_001014390.1 | HSPCB     |
| 920 | ELX  | 3  | ETD  | 19.38                           | 1 | (K)P K I E D V G s D E E D D S G K(D)                                 | S8 =k,S14 =nf     | NP_001014390.1 | HSPCB     |
| 921 | EL   | 3  | ETD  | 13                              | 1 | (K)P K I E D V G s D E E D D S G K(D)                                 | S8 =k,S14 =nf     | NP_001014390.1 | HSPCB     |
| 922 | ELX  | 4  | ETD  | 25.83                           | 1 | (K)P K I E D V G s D E E D D S G K D K(K)                             | S8 =k,S14 =nf     | NP_001014390.1 | HSPCB     |
| 923 | ELX  | 4  | ETD  | 15.78                           | 1 | (K)E E E N K D D E E K P K I E D V G s D E E D D S G K(D)             | S18 =n            | NP_001014390.1 | HSP90AB2P |
| 924 | EL   | 4  | ETD  | 16.45                           | 1 | (D)K D D E E K P K I E D V G s D E E D D S G K(D)                     | S14 =k            | NP_031381.2    | HSP90AB1  |
| 925 | EL   | 5  | ETD  | 21.04                           | 1 | (K)G E K E E E D K D D E E K P K I E D V G s D E E D D S G K(D)       | S21 =k            | NP_031381.2    | HSP90AB1  |
| 926 | EL   | 5  | ETD  | 19.64                           | 1 | (K)G E K E E E D K D D E E K P K I E D V G s D E E D D S G K D K(K)   | S21 =k            | NP_031381.2    | HSP90AB1  |
| 927 | ET   | 5  | ETD  | 19.52                           | 1 | (D)K E V s D D E A E E K E D K E E E K E E K(E)                       | S4 =k             | NP_001017963.1 | HSP90AA1  |
| 928 | EL   | 3  | ETD  | 19.12                           | 1 | (D)K P E I E D V G s D E E E E K(K)                                   | S9 =k             | NP_005339.2    | HSP90AA1  |
| 929 | ELX  | 3  | ETD  | 14.07                           | 1 | (D)K P E I E D V G s D E E E E K(K)                                   | S9 =k             | NP_005339.2    | HSP90AA1  |
| 930 | EL   | 3  | ETD  | 17.5                            | 1 | (D)K P E I E D V G s D E E E E K(K)                                   | S9 =k             | NP_005339.2    | HSP90AA1  |
| 931 | ELX  | 4  | ETD  | 12.48                           | 1 | (K)E R D K E V s D D E A E E K E D K(E)                               | S7 =k             | NP_001017963.1 | HSP90AA1  |
| 932 | ELX  | 4  | ETD  | 25.93                           | 1 | (K)E R D K E V s D D E A E E K E D K E E E K(E)                       | S7 =k             | NP_001017963.1 | HSP90AA1  |
| 933 | CL   | 3  | CID  | 17.1                            | 1 | (K)E S E D K P E I E D V G s D E E E E K(K)                           | S13 =k            | NP_001017963.1 | HSP90AA1  |
| 934 | ELX  | 4  | ETD  | 29.13                           | 1 | (K)E S E D K P E I E D V G s D E E E E K(K)                           | S13 =k            | NP_001017963.1 | HSP90AA1  |
| 935 | CL   | 4  | CID  | 16.09                           | 1 | (K)E S E D K P E I E D V G s D E E E E K(K)                           | S13 =k            | NP_001017963.1 | HSP90AA1  |
| 936 | ELX  | 4  | ETD  | 11.28                           | 1 | (K)E S E D K P E I E D V G s D E E E E K(K)                           | S13 =k            | NP_001017963.1 | HSP90AA1  |
| 937 | EL   | 4  | ETD  | 16.78                           | 1 | (K)E S E D K P E I E D V G s D E E E E K K D G D K(K)                 | S13 =k            | NP_001017963.1 | HSP90AA1  |
| 938 | ELX  | 4  | ETD  | 29.68                           | 1 | (K)E V s D D E A E E K E D K E E E K(E)                               | S3 =k             | NP_001017963.1 | HSP90AA1  |
| 939 | AL   | 3  | CID  | 15.41                           | 1 | (K)E V s D D E A E E K E D K E E E K(E)                               | S3 =k             | NP_001017963.1 | HSP90AA1  |
| 940 | CL   | 5  | CID  | 15.12                           | 2 | (K)Q D R t L t I V D T G I G m T K A D L I N N L G T I A K S G T K(A) | T4 =n,T6 =n       | NP_005339.2    | HSP90AA1  |
| 941 | ET   | 4  | ETD  | 11.45                           | 1 | (R)D K E V s D D E A E E K E D K E E E K(E)                           | S5 =k             | NP_001017963.1 | HSP90AA1  |

| #   | Exp. | CS | Number of phosphorylation sites |       | Sequence with fragments                                                   | Literature lookup             | RefSeq#        | Gene Symbol |
|-----|------|----|---------------------------------|-------|---------------------------------------------------------------------------|-------------------------------|----------------|-------------|
|     |      |    | Mode                            | Score |                                                                           |                               |                |             |
| 942 | ET   | 5  | ETD                             | 16.65 | 1 (R)D/K/E/V s D/D\E A\E\E K E\D K E E E K E\K(E)                         | S5 =k                         | NP_001017963.1 | HSP90AA1    |
| 943 | ET   | 5  | ETD                             | 19.86 | 1 (R)D K/E/V s/D\D E\A E E/K E\D K E/E E K\E K E E\K(E)                   | S5 =k                         | NP_005339.2    | HSP90AA1    |
| 944 | AT   | 4  | CID                             | 16.31 | 3 (K)K E P D D S R\D\E D E D E\D\E s\ s E E\D\s E/D E E P P P K(R)        | S16 =n,S17 =n,S21 =n          | NP_057371.2    | HP1BP3      |
| 945 | ELX  | 5  | ETD                             | 13.24 | 1 (K)E/S/T L I P P P P P F E\Q T F P\ s\ L Q P G A/S T L Q R P R S Q\K(R) | S17 =n                        | NP_002136.1    | HOXB2       |
| 946 | EG   | 4  | ETD                             | 27.68 | 1 (E)L/K K R R L\s D K G L K A\E(L)                                       | S7 =n                         | NP_004492.2    | HNRPU       |
| 947 | EL   | 5  | ETD                             | 21.83 | 1 D P\H\K(T)                                                              | T4 =n                         | NP_001524.2    | HNRPL       |
| 948 | CL   | 5  | CID                             | 13.06 | 1 D P H K(T)                                                              | T4 =n                         | NP_001524.2    | HNRPL       |
| 949 | EL   | 4  | ETD                             | 14.71 | 1 P\H\K(T)                                                                | Y30 =n                        | NP_001524.2    | HNRPL       |
| 950 | CL   | 4  | CID                             | 11.75 | 1 H\K(T)                                                                  | Y30 =n                        | NP_001524.2    | HNRPL       |
| 951 | CG   | 2  | CID                             | 20.74 | 1 (E)G/L Q L P s/P T A T S Q L P L\E(S)                                   | S6 =k                         | NP_002131.2    | HNRPK       |
| 952 | CG   | 3  | CID                             | 16.58 | 1 (E)G L Q\L P s P T A\T S Q L P L E S D\A\V\E(C)                         | S6 =k                         | NP_002131.2    | HNRPK       |
| 953 | CT   | 2  | CID                             | 13.32 | 1 (R)D/Y D D M s P R(R)                                                   | S6 =k                         | NP_002131.2    | HNRPK       |
| 954 | AT   | 3  | ETD                             | 16.17 | 1 (K)H T G P N\s P D T A N\D G F\V\R(L)                                   | S6 =k,T2 =nf                  | NP_001027565.1 | HNRPH1      |
| 955 | CT   | 3  | CID                             | 15.55 | 1 (K)H T G P N\s P/D t A N D G F\V\R(L)                                   | T9 =n,T2 =nf,S6 =nf           | NP_001027565.1 | HNRPH1      |
| 956 | ET   | 4  | ETD                             | 10.75 | 1 (K)I/D/A/S/K N\E E D E G H S N\s S P R(H)                               | S15 =k,S16 =nf                | NP_002129.2    | HNRPD       |
| 957 | ET   | 3  | ETD                             | 3.89  | 3 (K)I/D A/S K N\E E D E G H s N s s P R(H)                               | S13 =n,S15 =k,S16 =k          | NP_002129.2    | HNRPD       |
| 958 | ET   | 4  | ETD                             | 8.67  | 2 (K)I D A S K N\E/E/D/E/G H\S N S\s P R/H\s E A A/T/A Q R(E)             | S16 =k,S20 =k,S15 =nf         | NP_002129.2    | HNRPD       |
| 959 | ELX  | 5  | ETD                             | 24.62 | 1 (K)I/D/A S K N\E/E D\E G H S N\s S P R\H S E A A T\A Q R E E W\K(M)     | S15 =k,S16 =nf,S20 =nf        | NP_002129.2    | HNRPD       |
| 960 | ELX  | 5  | ETD                             | 20.91 | 1 (K)I/D A/S K N\E/E D E G H S N S S P R\H S E A A T A Q\R E E W\K(M)     | S16 =k,S15 =nf,S20 =nf        | NP_002129.2    | HNRPD       |
| 961 | ELX  | 5  | ETD                             | 14.81 | 2 (K)I/D A/S K N\E E/D E G H S N/S S P R H\S E A A T A Q\R E/E W\K(M)     | S13 =n,S20 =k,S15 =nf,S16 =nf | NP_002129.2    | HNRPD       |
| 962 | ELX  | 4  | ETD                             | 20.14 | 1 (K)N/E E D E G H S N/S S P R H S E A A T\A\Q\R E E W\K(M)               | S11 =n,S10 =nf                | NP_112738.1    | HNRPD       |
| 963 | ELX  | 5  | ETD                             | 30.45 | 1 (K)N/E E D E G H S N\S S P R H S E A A T A Q\R E E W\K(M)               | S11 =k,S10 =nf,S15 =nf        | NP_002129.2    | HNRPD       |
| 964 | ELX  | 5  | ETD                             | 27.23 | 2 (K)N/E E D E G H S N S\s P R\H S E A A T A Q R E E W\K(M)               | S8 =n,S11 =k,S10 =nf,S15 =nf  | NP_002129.2    | HNRPD       |
| 965 | ELX  | 5  | ETD                             | 12.29 | 2 (K)N/E E D E G H S N s S P R H\S E/A A t/A\Q R E E W\K(M)               | S10 =k,T19 =n,S11 =nf,S15 =nf | NP_002129.2    | HNRPD       |
| 966 | CG   | 3  | CID                             | 25.56 | 1 (E)s/E G G A D D S A/E E G D L L D D D D n E/D R\G D\D\Q\L\E(L)         | S1 =k                         | P07910         | HNRPC       |
| 967 | CG   | 3  | CID                             | 19.84 | 1 (E)S E G G A D D S A/E E G D L L D D D D n E/D R\G D\D\Q\L\E(L)         | S8 =n,S1 =nf                  | P07910         | HNRPC       |
| 968 | CT   | 3  | CID                             | 15.27 | 1 (K)m E s E G G A D D/S/A/E E G D\L/L/D/D D/D/N E\D R(G)                 | S3 =k,S10 =nf                 | NP_004491.1    | HNRPC       |
| 969 | ELX  | 4  | ETD                             | 17.13 | 1 K(D)                                                                    | S10 =k,S3 =nf                 | NP_004491.1    | HNRPC       |
| 970 | ELX  | 4  | ETD                             | 14.23 | 1 I\K(D)                                                                  | S10 =k,S3 =nf                 | NP_004491.1    | HNRPC       |
| 971 | ELX  | 5  | ETD                             | 13.02 | 1 K D D E\K(E)                                                            | S10 =k,S3 =nf                 | NP_004491.1    | HNRPC       |
| 972 | ELX  | 5  | ETD                             | 11.92 | 1 K D D E K(E)                                                            | S10 =k,S3 =nf                 | NP_004491.1    | HNRPC       |
| 973 | ET   | 4  | ETD                             | 24.45 | 1 (K)N/D K S E E E Q S S S s V K K D E T N\V\K(M)                         | S12 =n                        | NP_004491.1    | HNRPC       |
| 974 | ELX  | 4  | ETD                             | 23.45 | 3 (K)N/D/K s E E E Q s/S S\s V K K D E T N\V\K(M)                         | S4 =n,S9 =n,S12 =n            | NP_004491.1    | HNRPC       |
| 975 | ET   | 4  | ETD                             | 13.68 | 2 (K)N D/K S E E E Q s S S\s V\K\K D E T N\V\K(M)                         | S9 =n,S12 =n                  | NP_004491.1    | HNRPC       |
| 976 | ELX  | 4  | ETD                             | 7.36  | 2 (K)N/D/K/S E/E/E Q s S S V K\K D E T N V\K(M)                           | S9 =n,S10 =n                  | NP_004491.1    | HNRPC       |

| #    | Exp. | CS | Mode | Number of phosphorylation sites |   | Sequence with fragments                                                                 | Literature lookup    | RefSeq#        | Gene     |        |
|------|------|----|------|---------------------------------|---|-----------------------------------------------------------------------------------------|----------------------|----------------|----------|--------|
|      |      |    |      | Score                           | ▼ |                                                                                         |                      |                | Symbol   | Symbol |
| 977  | AT   | 4  | ETD  | 12.77                           | 1 | (K)Q/A V E m K N D\K s\E E E\Q S S/S S V\K(K)                                           | S10 =n               | NP_004491.1    | HNRPC    |        |
| 978  | ET   | 3  | ETD  | 12.3                            | 1 | (K)Q A V E M K N D K\ s E E E Q S S S V\K(K)                                            | S10 =n               | NP_004491.1    | HNRPC    |        |
| 979  | ELX  | 4  | ETD  | 9.14                            | 1 | (K)Q/A/V E m K N D/K/s E E E Q S S S V/K K(D)                                           | S10 =n               | NP_004491.1    | HNRPC    |        |
| 980  | ET   | 4  | ETD  | 8.77                            | 2 | (K)Q A V E M K/N D K S\E E\E Q/s/S s S\ V K K D E T N V K(M)                            | S15 =n,S17 =n        | NP_112604.1    | HNRPC    |        |
| 981  | ELX  | 4  | ETD  | 19.52                           | 2 | (K)S/E/E\E Q\ s S S S V K K D E T N V\K(L)                                              | S6 =n,S9 =n          | NP_004491.1    | HNRPC    |        |
| 982  | ELX  | 3  | ETD  | 8.18                            | 1 | (K)S/E/E/E Q S S s S V\K K D E T N V\K(L)                                               | S8 =n                | NP_004491.1    | HNRPC    |        |
| 983  | AT   | 2  | CID  | 10.34                           | 1 | (R)m Y s Y/P\A/R(V)                                                                     | S3 =n                | NP_004491.1    | HNRPC    |        |
| 984  | ELX  | 5  | ETD  | 15.39                           | 1 | (K)E V y Q Q Q Q Y G S G G R\G N R\N R G N\ R G S G G/G G G G\G\G\Q\G S<br>T N Y G\K(S) | Y3 =n                | NP_004490.2    | HNRPA3   |        |
| 985  | CL   | 4  | CID  | 9.49                            | 1 | (K)G G S F/G/G R\ s S G S/P/Y/G/G G Y/G S G G G S/G G Y G S R R F(-)                    | S8 =n                | NP_919223.1    | HNRPA3   |        |
| 986  | ET   | 3  | ETD  | 12.17                           | 1 | (R)E D/s\ V K P\G A H L T\ V\K(K)                                                       | S3 =n                | NP_005749.1    | HNRPA3   |        |
| 987  | ELX  | 4  | ETD  | 23.24                           | 1 | (K)Y/H t I N G/H N A\E V R\K(A)                                                         | T3 =n                | NP_002128.1    | HNRPA2B1 |        |
| 988  | CT   | 3  | CID  | 21.48                           | 1 | (R)G F G D/G Y N G/Y G/G/G P/G G N F/G G s/P G Y G G G R(G)                             | S21 =n               | NP_002128.1    | HNRPA2B1 |        |
| 989  | CT   | 4  | CID  | 14.62                           | 3 | (R)N M G G P Y G\G G/N/Y/G P\G G s G G/s\G G/y G/G R S R Y(-)                           | S16 =k,S19 =k,Y22 =n | NP_002128.1    | HNRPA2B1 |        |
| 990  | CT   | 4  | CID  | 12.26                           | 1 | (R)S G R G G N\F\G F G/D s/R G G G G N/F/G/P/G/P/G/S/N F R(G)                           | S12 =n               | NP_002128.1    | HNRPA2B1 |        |
| 991  | EG   | 4  | ETD  | 12.37                           | 1 | (E)D/s Q R P G\A H L T/V K\K I/F\ V\G\G\I\K\E(D)                                        | S2 =n                | NP_001011724.1 | HNRPA1   |        |
| 992  | ELX  | 3  | ETD  | 20.77                           | 1 | (K)G/G/N/F/G G/R S s G P Y G G G G Y F A\K(P)                                           | S9 =n                | NP_002127.1    | HNRPA1   |        |
| 993  | ELX  | 5  | ETD  | 30.03                           | 1 | (K)R/A V S R E D/s Q R P G A H L T\ V\K(K)                                              | S8 =n                | NP_002127.1    | HNRPA1   |        |
| 994  | ELX  | 4  | ETD  | 19.2                            | 2 | (K)R/A V\ s R/E D s Q R P\G\A H L T\ V\K(K)                                             | S4 =n,S8 =n          | NP_002127.1    | HNRPA1   |        |
| 995  | AT   | 3  | CID  | 19.46                           | 1 | (K)S E s P K E P E Q L R\K(K)                                                           | S3 =k                | NP_002127.1    | HNRPA1   |        |
| 996  | AT   | 3  | ETD  | 17.83                           | 1 | (K)S/E s P K E P E Q L R\K(K)                                                           | S3 =k                | NP_002127.1    | HNRPA1   |        |
| 997  | ELX  | 4  | ETD  | 27.1                            | 1 | (K)S/E s P K E P E Q L R\K(L)                                                           | S3 =k                | NP_002127.1    | HNRPA1   |        |
| 998  | AT   | 3  | CID  | 14.72                           | 1 | (K)S E s P K E P E Q L R K(L)                                                           | S3 =k                | NP_002127.1    | HNRPA1   |        |
| 999  | ET   | 4  | ETD  | 6.15                            | 1 | (K)y H T\ V N G H\N\C\E/V R(K)                                                          | Y1 =n                | NP_002127.1    | HNRPA1   |        |
| 1000 | ET   | 3  | ETD  | 15.16                           | 1 | (R)E/D/s Q R P G A H L T\ V\K(K)                                                        | S3 =n                | NP_001011724.1 | HNRPA1   |        |
| 1001 | ET   | 2  | ETD  | 9.27                            | 1 | (R)S/s/G P/Y/G/G/G/G/Q Y\F\A\K(P)                                                       | S2 =n                | NP_001011724.1 | HNRPA1   |        |
| 1002 | AT   | 4  | ETD  | 11.4                            | 1 | (R)A/V/s R E D S A/R P/G A H A\K(V)                                                     | S3 =n                | NP_006796.1    | HNRPA0   |        |
| 1003 | ELX  | 3  | ETD  | 12.85                           | 1 | (K)K/H P D/S s\ V\N F A E F S\K(K)                                                      | S6 =k                | NP_002120.1    | HMGB2    |        |
| 1004 | ELX  | 4  | ETD  | 8.86                            | 1 | (K)Y E K D I/A\A/y/R A K(G)                                                             | Y8 =n                | NP_002119.1    | HMGB2    |        |
| 1005 | ELX  | 4  | ETD  | 7.45                            | 1 | (K)y\E K D I\A\A/Y/R A\K(G)                                                             | Y1 =n                | NP_002119.1    | HMGB2    |        |
| 1006 | ELX  | 3  | ETD  | 21.51                           | 1 | (K)K H P D A s V N F S E F S\K(K)                                                       | S6 =n                | NP_002119.1    | HMGB1    |        |
| 1007 | EG   | 5  | ETD  | 31.35                           | 1 | (E)K/T P/V K K K A R K s A G A A K R K A/S/G/P P V S\E(L)                               | S11 =k,T2 =nf        | NP_005312.1    | HIST1H1E |        |
| 1008 | AG   | 5  | ETD  | 23.94                           | 2 | (E)K/t P V K K K A R K s\A/G\A\A\K\R K A S G P P V S\E(L)                               | T2 =k,S11 =k         | NP_005312.1    | HIST1H1E |        |
| 1009 | ELX  | 3  | ETD  | 12.81                           | 1 | (K)R/K\A s G P P V/S E L I T\K(A)                                                       | S4 =n                | NP_005311.1    | HIST1H1D |        |
| 1010 | CT   | 3  | CID  | 11.53                           | 1 | (K)R K/A s G P/P V/S/E L I T K(A)                                                       | S4 =n                | NP_005311.1    | HIST1H1E |        |
| 1011 | EG   | 5  | ETD  | 19.34                           | 1 | (E)K/t/P V K K K A K K A G\A\T A G K R K A S G P P V S\E(L)                             | T2 =n                | NP_005311.1    | HIST1H1D |        |

| #    | Exp. | CS | Number of phosphorylation sites |       | Sequence with fragments                                                 | Literature lookup    | RefSeq#      | Gene Symbol |
|------|------|----|---------------------------------|-------|-------------------------------------------------------------------------|----------------------|--------------|-------------|
|      |      |    | Mode                            | Score |                                                                         |                      |              |             |
| 1012 | ET   | 2  | ETD                             | 3.17  | 1 (K)t P/Q P/K K\A\K(S)                                                 | T1 =k                | NP_005311.1  | HIST1H1D    |
| 1013 | AT   | 3  | CID                             | 20.24 | 1 (R)K A s/G P P V S E\L/I\T\K(A)                                       | S3 =n                | NP_005310.1  | HIST1H1C    |
| 1014 | AT   | 3  | ETD                             | 17.7  | 1 (R)K/A s G P P V S E L I T\K(A)                                       | S3 =n                | NP_005310.1  | HIST1H1D    |
| 1015 | CT   | 2  | CID                             | 17.09 | 1 (R)K A/s/G/P/P V S/E L I T K(A)                                       | S3 =n                | NP_005310.1  | HIST1H1E    |
| 1016 | AG   | 5  | ETD                             | 25.15 | 1 (E)K/A P V K K/K A A\K/K A/G G t P R K A S G P\ P V S\E(L)            | T15 =n               | NP_005310.1  | HIST1H1C    |
| 1017 | ELX  | 4  | ETD                             | 7.2   | 2 (K)K/A G/G/t P R K A/s G P P/V/S E\L I T\K(A)                         | T5 =n,S10 =n         | NP_005310.1  | HIST1H1C    |
| 1018 | EG   | 5  | ETD                             | 19.15 | 1 (S)L/V S K\G/T\L V\Q T K\G T G/A S\G s F K L\N K K A A S\G\E(A)       | S18 =n               | NP_005310.1á | HIST1H1C    |
| 1019 | CL   | 3  | CID                             | 8.96  | 1 (K)K P/A A\T\R\K S\S\K(N)                                             | T5 =n                | NP_005316.1  | HIST1H1A    |
| 1020 | ELX  | 4  | ETD                             | 9.75  | 3 (K)E/A A/s s G D D s G\R D R E P P\V Q R\K(S)                         | S4 =n,S5 =n,S9 =n    | NP_003600.2  | HIRIP3      |
| 1021 | ELX  | 4  | ETD                             | 19.19 | 2 (K)N/G V A A/E/V s P\A K/E E N P R R A s\K(A)                         | S8 =k,S19 =n         | NP_003600.2  | HIRIP3      |
| 1022 | ELX  | 4  | ETD                             | 31.06 | 2 (K)Q/A/R E E s\E E s E A E P V/Q R T\A\K(K)                           | S6 =k,S9 =k          | NP_003600.2  | HIRIP3      |
| 1023 | ELX  | 4  | ETD                             | 27.85 | 3 (K)R L/s G s s E D E E D S G K G E P\T\A\K(G)                         | S3 =n,S5 =n,S6 =n    | NP_003600.2  | HIRIP3      |
| 1024 | ELX  | 3  | ETD                             | 10.54 | 2 (K)S/L/K E s E/Q E/s E E E/I/L\A/Q\K(K)                               | S5 =k,S9 =k          | NP_003600.2  | HIRIP3      |
| 1025 | ELX  | 4  | ETD                             | 27.02 | 2 (K)S/L/K E s E\Q E\s E E E I\L\A\Q K\K(E)                             | S5 =k,S9 =k          | NP_003600.2  | HIRIP3      |
| 1026 | ELX  | 3  | ETD                             | 5.4   | 1 (K)K P\s L D D L\K(E)                                                 | S3 =n                | NP_056416.2  | HERC4       |
| 1027 | EL   | 5  | ETD                             | 12.26 | 3 (K)G G I V/L I D A H K\D t L/I s/M/K/W\D P T G H\I L M t\C/A K(E)     | T12 =n,S15 =n,T27 =n | NP_003913.2  | HERC1       |
| 1028 | ELX  | 3  | ETD                             | 13.02 | 2 (K)G N/A/E G s s/D/E E G K L V I/D/E P\A\K(E)                         | S6 =k,S7 =k          | NP_004485.1  | HDGF        |
| 1029 | ELX  | 3  | ETD                             | 11.57 | 2 (K)K G N A E G\s s D E E G K L V\I/D E P\A\K(E)                       | S7 =k,S8 =k          | NP_004485.1  | HDGF        |
| 1030 | ELX  | 3  | ETD                             | 22.52 | 1 (K)R R A/G D L L E D s P\K(R)                                         | S10 =k               | NP_004485.1  | HDGF        |
| 1031 | CL   | 3  | CID                             | 13.24 | 1 (K)R/R\A G\D L\L\E\D s/P K(R)                                         | S10 =k               | NP_004485.1  | HDGF        |
| 1032 | ELX  | 4  | ETD                             | 29.53 | 1 (K)R/R A G D L L E D s P K R P\K(E)                                   | S10 =k               | NP_004485.1  | HDGF        |
| 1033 | CL   | 4  | CID                             | 9.25  | 1 (K)R R\A G D\L L\E D s P\K R P K(E)                                   | S10 =k               | NP_004485.1  | HDGF        |
| 1034 | CL   | 3  | CID                             | 11.47 | 1 (K)s C V/E/E/P/E/P E/P E/A A E G D G D K K(G)                         | S1 =n                | NP_004485.1  | HDGF        |
| 1035 | ELX  | 4  | ETD                             | 8.05  | 2 (K)S C V/E/E P E P/E P\E A A E G D/G D K K G N\A E G s s D E E G\K(L) | S26 =k,S27 =k        | NP_004485.1  | HDGF        |
| 1036 | CT   | 2  | CID                             | 15.84 | 1 (R)A G/D L L E D s P K(R)                                             | S8 =k                | NP_004485.1  | HDGF        |
| 1037 | ET   | 3  | ETD                             | 18.53 | 1 (R)A G/D/L/L E D s P K R P K(E)                                       | S8 =k                | NP_004485.1  | HDGF        |
| 1038 | ET   | 3  | ETD                             | 28.16 | 1 (R)R A G D L/L E D/s P K/R P K(E)                                     | S9 =k                | NP_004485.1  | HDGF        |
| 1039 | ET   | 3  | ETD                             | 6.33  | 1 (R)Q/N/P/Q S P P Q D S S/V t S\K R\N I K\K(G)                         | T13 =n,S5 =nf        | NP_006035.2  | HDAC6       |
| 1040 | EL   | 4  | ETD                             | 16.41 | 2 (K)R/I\A\C D E E F/s D\s E/D E G E G G R R\N\V\A D H\K(K)             | S9 =k,S11 =k         | NP_001518.1  | HDAC2       |
| 1041 | AL   | 5  | ETD                             | 15.99 | 2 (K)R/I A C/D E E F s D s E D E G E G G\R R N\V A D H K\K(G)           | S9 =k,S11 =k         | NP_001518.1  | HDAC2       |
| 1042 | AL   | 3  | ETD                             | 12.59 | 1 (K)R/I s I R A S D\K(R)                                               | S3 =n                | NP_001518.1  | HDAC2       |
| 1043 | AT   | 4  | CID                             | 20.28 | 1 (R)m L/P H A P/G V\Q\m Q/A I P/E\A\A\H E D s G D/E D/G E/D/P D K R(I) | S22 =k               | NP_001518.1  | HDAC2       |
| 1044 | EL   | 4  | ETD                             | 18.71 | 2 (K)R I A\C E E E F s/D/s E E/E\G E\G G R\K(N)                         | S9 =k,S11 =k         | NP_004955.2  | HDAC1       |
| 1045 | CL   | 3  | CID                             | 13.74 | 1 (K)D A/Q/R L s P I P E\E V P K(S)                                     | S6 =n                | NP_057662.3  | HBXAP       |
| 1046 | CL   | 3  | CID                             | 17.31 | 1 (K)E D/R S A s S G A E G D V S S E R\E\(-)                            | S6 =n                | NP_543010.3  | HARS2       |

| #    | Exp. | CS | Number of phosphorylation sites |       |   | Sequence with fragments                                                                     | Literature lookup   | RefSeq#        | Gene       |
|------|------|----|---------------------------------|-------|---|---------------------------------------------------------------------------------------------|---------------------|----------------|------------|
|      |      |    | Mode                            | Score | ▼ |                                                                                             |                     |                | Symbol     |
| 1047 | AL   | 3  | CID                             | 12.84 | 2 | (K)E D/R\ S A/s S\G A\ E G\ D V/s\ S/E/R\ E\ P(-)                                           | S6 =n,S14 =n        | NP_543010.3    | HARS2      |
| 1048 | CL   | 2  | CID                             | 10.05 | 1 | (K)A G G S/A A L s/P S K(K)                                                                 | S8 =k               | NP_006017.1    | H1FX       |
| 1049 | CL   | 3  | CID                             | 14.35 | 2 | (K)N I S S M S/N M N s\ S\R\m\ D/s\ P K(R)                                                  | S10 =n,S15 =n       | NP_000824.1    | GRIN2A     |
| 1050 | CL   | 3  | CID                             | 20.39 | 1 | (K)S P/P R E/G/S Q G E L\T P A N S Q S/R m\ s T N m(-)                                      | S21 =n              | NP_004118.3    | GPS1       |
| 1051 | CL   | 4  | CID                             | 9.69  | 2 | (K)s P P R/E\G\ S Q G E L/T\ P A\ N S Q\ S\ R m s T N M(-)                                  | S1 =n,S21 =n        | NP_004118.3    | GPS1       |
| 1052 | CL   | 2  | CID                             | 14.85 | 2 | (K)I S/L/P/G Q/m A/G\ t/P I t/P L K(D)                                                      | T10 =n,T13 =k       | NP_056345.3    | GORASP2    |
| 1053 | ELX  | 4  | ETD                             | 7.51  | 1 | (K)H R N/D H/L T S T T\ S\ s P G V I\ V P\ E\ S S\ E\ N K(N)                                | S12 =n              | NP_056979.1    | GMNN       |
| 1054 | ELX  | 3  | ETD                             | 5.99  | 1 | (K)L/P C R/D D\ D G\ V/T A\ K D L s\ K(Q)                                                   | S15 =n              | NP_054749.2    | GIT1       |
| 1055 | ELX  | 4  | ETD                             | 10.91 | 2 | (K)N L/L H\ S L Q s/s G/I G\ S K(A)                                                         | S8 =n,S9 =n         | NP_006827.1    | GCN1L1     |
| 1056 | CT   | 3  | CID                             | 18.3  | 1 | (R)L Q Q Q A A L s/P T/T/A P A/V S S V S\ K(Q)                                              | S8 =n               | NP_065750.1    | GATAD2B    |
| 1057 | EL   | 4  | ETD                             | 17.03 | 1 | (K)E D H s L E H R C V\ E S\ A\ K(I)                                                        | S4 =n               | NP_009216.1    | GABARAPL2  |
| 1058 | AT   | 3  | CID                             | 20.63 | 2 | (K)S T/t P/P P A E P V s/L/P Q/E/P P K/P R(V)                                               | T3 =k,S11 =n        | NP_987100.1    | G3BP2      |
| 1059 | ET   | 4  | ETD                             | 12.52 | 1 | (K)S/T/t P/P P A E P\ V S L P Q E P P/K P\ R(V)                                             | T3 =k               | NP_987100.1    | G3BP2      |
| 1060 | ET   | 4  | ETD                             | 17.36 | 3 | (R)R/R s/R s R s F D Y N\ Y\ R(R)                                                           | S3 =n,S5 =n,S7 =k   | NP_006616.1    | FUSIP1     |
| 1061 | ET   | 3  | ETD                             | 14.02 | 3 | (R)s R s R s F D Y N\ Y\ R(R)                                                               | S1 =n,S3 =n,S5 =k   | NP_006616.1    | FUSIP1     |
| 1062 | EG   | 3  | ETD                             | 9.26  | 1 | (E)Y/L F D K H\T/L/G D s D/N\ E\ S(-)                                                       | S11 =k              | NP_001008698.1 | FTH1FTHL16 |
| 1063 | AL   | 3  | CID                             | 18.23 | 2 | (K)E E/A/P/A/s/P L R/P L/Y P/Q/I s\ P\ L K(I)                                               | S6 =n,S16 =n        | NP_001032242.1 | FOXK1      |
| 1064 | ET   | 3  | ETD                             | 19.62 | 1 | (R)E/G s P I P H D P E/F/G S K(L)                                                           | S3 =n               | NP_001032242.1 | FOXK1      |
| 1065 | ELX  | 3  | ETD                             | 7.6   | 1 | (K)G/K\G\G T/Q\ V D/T\ E I/E/E\K/D E/E t K(A)                                               | T18 =n              | NP_055738.2    | FNDC3A     |
| 1066 | EL   | 3  | ETD                             | 6.25  | 1 | (K)V/Q/t T P\K/V/E E E Q D\ L\ K(F)                                                         | T3 =n               | NP_056123.1    | FNBP4      |
| 1067 | AL   | 4  | CID                             | 12.2  | 2 | (K)R t V S D/N s/L S/N/S R G E G K P\ D L\ K(F)                                             | T2 =n,S7 =n,S4 =nf  | NP_055848.1    | FNBP1      |
| 1068 | AL   | 4  | ETD                             | 12.01 | 2 | (K)R/T V/s D N/s L S N/S R G\ E\ G K/P D L\ K(F)                                            | S4 =k,S7 =n         | NP_055848.1    | FNBP1      |
| 1069 | AG   | 5  | ETD                             | 9.78  | 3 | (E)Y D\H\m N G s\R\ E S/P V D C S\ V/s K C s\ K/L V\ G G G E(S)                             | S7 =n,S17 =n,S20 =n | NP_002008.2    | FLI1       |
| 1070 | ELX  | 4  | ETD                             | 17.61 | 2 | (K)G P/T T G E G/A/L D/L S D V H s P P K\ s P/E\ G\ K(T)                                    | S16 =k,S20 =k       | NP_008976.1    | FGFR1OP    |
| 1071 | AL   | 4  | ETD                             | 16.57 | 2 | (K)D/R D L P\F S R P Q L R V s/P A/t P K(A)                                                 | S14 =n,T17 =n       | NP_071897.1    | FBS1       |
| 1072 | ELX  | 5  | ETD                             | 15.44 | 2 | (K)S P T M E Q A V Q t A S A H L P A P A/A\ V G R R\ S P V s/T/R P\ L P\ S A S Q\ K(A)      | T10 =n,S28 =n       | NP_056393.1    | FAM61A     |
| 1073 | ELX  | 5  | ETD                             | 14.62 | 2 | (K)S P T M E Q A V Q T A s/A H L P A P A A V G R R s P/V S T R P\ L P\ S A S Q\ K(A)        | S12 =n,S25 =n       | NP_056393.1    | FAM61A     |
| 1074 | ELX  | 5  | ETD                             | 10.48 | 2 | (K)S P\ T M E Q A V Q t A S A H L P A P A A V G R\ R\ s/P/V S T R P\ L P\ S A S\ Q\ K(A)    | T10 =n,S25 =n       | NP_056393.1    | FAM61A     |
| 1075 | ELX  | 5  | ETD                             | 8.11  | 2 | (K)s P T m E Q A V/Q T A S A/H L P A P A A V G R  R S P\ V s T\ R\ P\ L P\ S\ A\ S\ Q\ K(A) | S1 =n,S28 =n        | NP_056393.1    | FAM61A     |
| 1076 | ELX  | 4  | ETD                             | 28.71 | 2 | (K)T/Q/L/s Q G R S s P Q L D P L R\ K(S)                                                    | S4 =n,S9 =n         | NP_056393.1    | FAM61A     |
| 1077 | EL   | 4  | ETD                             | 8.16  | 1 | (K)D/T D s D R E\ A G\ T\ E T G G E N N D/K E E E\ K(K)                                     | S4 =n               | NP_004447.2    | EZH2       |
| 1078 | ELX  | 4  | ETD                             | 11.84 | 2 | (K)N V s\ E\ S\ P\ S\ K\ H\ E\ N\ s K(D)                                                    | S3 =n,S12 =n        | NP_055880.1    | EXPH5      |
| 1079 | ET   | 5  | ETD                             | 16.19 | 1 | (R)Q L/P/A K W S\G A\C/V/L G t/I/R/P S F/F L m\ P L K(Q)                                    | T14 =n              | NP_001007254.1 | ERV3       |



| #    | Exp. | CS | Number of phosphorylation sites |       | Sequence with fragments                                                                                                | Literature lookup             | RefSeq#        | Gene Symbol |
|------|------|----|---------------------------------|-------|------------------------------------------------------------------------------------------------------------------------|-------------------------------|----------------|-------------|
|      |      |    | Mode                            | Score |                                                                                                                        |                               |                |             |
| 1080 | CL   | 4  | CID                             | 20.15 | 1 (K)E Y I   P G Q   P P L S Q \ S D s s P \ T R \ N S E   P / A / G   L   E / T   P E A K (V)                         | S15 =n,T28 =nf                | NP_004437.2    | EPRS        |
| 1081 | ELX  | 4  | ETD                             | 15.38 | 1 (K)E Y I P G Q P / P / L   S   Q S   S D S \ s P / T R   N S \ E P \ A \ G   L E   T P E / A K (V)                   | S16 =n,T28 =nf                | NP_004437.2    | EPRS        |
| 1082 | EL   | 4  | ETD                             | 13.2  | 1 (K)E Y I P G / Q P P \ L / S   Q \ S \ S / D S / S P T R N / s E \ P / A   G   L \ E   T P E   A \ K (V)             | S21 =n,T28 =nf                | NP_004437.2    | EPRS        |
| 1083 | EL   | 4  | ETD                             | 13.27 | 1 (K)G S Q P P P / A / A   E   S   Q   S   s L R \ R \ Q \ K (R)                                                       | S13 =n                        | NP_001422.1    | EPB41L2     |
| 1084 | EL   | 2  | ETD                             | 7.38  | 1 (K)s / Y / T / L / V   V   A \ K (D)                                                                                 | S1 =n                         | NP_001422.1    | EPB41L2     |
| 1085 | AT   | 4  | CID                             | 16.09 | 1 (R)V / T / E / G / T / I / R E / E Q / E y E E / E / V / E E / E   P R P A \ A K (V)                                 | Y12 =n                        | NP_001422.1    | EPB41L2     |
| 1086 | ET   | 5  | ETD                             | 17.76 | 1 (K)R P K s   Q / V S E   E / G   K \ E V   E \ S   D \ K \ E \ K (G)                                                 | S4 =n                         | AAD42222.1     | EPB41       |
| 1087 | ELX  | 3  | ETD                             | 13.32 | 1 (K)A / K   Y P   s   L   G   Q \ K (P)                                                                               | S5 =n                         | NP_004427.1    | ENSA        |
| 1088 | ELX  | 4  | ETD                             | 27.2  | 1 (K)A / K   Y P s   L G   Q   K P / G   G   S   D   F   L   m K (R)                                                   | S5 =n                         | NP_004427.1    | ENSA        |
| 1089 | ELX  | 2  | ETD                             | 7.93  | 1 (K)Y / F / D / S / G D / y / N m   A \ K (A)                                                                         | Y7 =n                         | NP_004427.1    | ENSA        |
| 1090 | ELX  | 3  | ETD                             | 9.16  | 1 (K)Y / F   D   S / G D \ y N / M A \ K   A K (M)                                                                     | Y7 =n                         | NP_004427.1    | ENSA        |
| 1091 | ELX  | 3  | ETD                             | 15.66 | 1 (K)Y P \ s L G Q \ K P   G   G   S   D   F   L   m \ K (R)                                                           | S3 =n                         | NP_004427.1    | ENSA        |
| 1092 | AT   | 5  | ETD                             | 11.4  | 1 (R)y m G \ K / G / V \ S / K / A / V \ E H / I N K (T)                                                               | Y1 =n                         | NP_001419.1    | ENO1        |
| 1093 | AG   | 3  | CID                             | 20.09 | 1 (E)T G P T / L / P R \ Q N s Q L   P A   Q   V Q \ N   G   P S Q \ E E (L)                                           | S10 =n                        | NP_001008493.1 | ENAH        |
| 1094 | EL   | 5  | ETD                             | 12.83 | 1 (K)A / S S / T \ S / T / P   E P T   R \ K P W   E   R \ T \ N t \ m \ N \ G \ S K (S)                               | T19 =n                        | NP_001008493.1 | ENAH        |
| 1095 | EL   | 5  | ETD                             | 16.11 | 2 (K)A / S / S T / S T P   E P T   R   K P W   E   R / T N / t   m   N G \ S K \ s \ P V I S   R P \ K (S)             | T19 =n,S25 =n                 | NP_060682.2    | ENAH        |
| 1096 | AL   | 4  | CID                             | 12.35 | 1 (K)L R K V S R M E D t \ S \ F \ P S G G N \ A   I   G   V / N \ S A S \ S K (T)                                     | T10 =n                        | NP_001008493.1 | ENAH        |
| 1097 | AL   | 4  | ETD                             | 12.04 | 1 (K)L / R   K V s   R / M / E \ D T S F / P S \ G / G   N   A I \ G \ V / N   S \ A \ S \ S \ K (T)                   | S5 =n                         | NP_001008493.1 | ENAH        |
| 1098 | EL   | 4  | ETD                             | 9.96  | 2 (K)P / W   E \ R \ T   N   t   m   N G   S K / s P V I S / R P \ K (S)                                               | T7 =n,S13 =n                  | NP_060682.2    | ENAH        |
| 1099 | ET   | 4  | ETD                             | 10.91 | 1 (R)T N / T \ m   N / G \ S   K   s P   V   I   S   R P \ K (S)                                                       | S9 =n                         | NP_060682.2    | ENAH        |
| 1100 | EG   | 3  | ETD                             | 24.59 | 1 (E)V / V / y   S   K   A   A   S   V P   K \ V \ E (T)                                                               | Y3 =n                         | NP_001960.2    | EIF5        |
| 1101 | EL   | 3  | ETD                             | 11.61 | 1 (K)A / A / s   V P   K \ V   E   T \ V \ K (S)                                                                       | S3 =n                         | NP_001960.2    | EIF5        |
| 1102 | CL   | 3  | CID                             | 19.39 | 2 (K)E A E E E s s \ G G E \ E \ E   D E / D E N I   E   V   V   Y \ S K (A)                                           | S6 =k,S7 =k                   | NP_001960.2    | EIF5        |
| 1103 | EL   | 3  | ETD                             | 9.8   | 1 (K)N / P P / E N s D / S   G / T / G   K   K \ E \ K (E)                                                             | S6 =n                         | NP_001960.2    | EIF5        |
| 1104 | ELX  | 4  | ETD                             | 19.01 | 1 (K)A / A / s   L T   E   D   R   D   R / G / R   D   A V \ K (R)                                                     | S3 =k                         | NP_004944.2    | EIF4G1      |
| 1105 | ELX  | 3  | ETD                             | 14.64 | 1 (K)F / L / m   E   C   R   N   s P V \ T \ K (T)                                                                     | S8 =k                         | NP_004086.1    | EIF4EBP1    |
| 1106 | ELX  | 5  | ETD                             | 19.43 | 2 (K)t P P R / D / L P / T I P G V T S P S / S D   E \ P P m \ E \ A S Q S \ H   L \ R N \ s P \ E   D \ K (R)         | T1 =k,S32 =k,S14 =nf          | NP_004086.1    | EIF4EBP1    |
| 1107 | ELX  | 5  | ETD                             | 16.27 | 1 (K)T P / P / R   D   L P   T / I P G \ V T / S P S / S D   E / P P m E / A \ s   Q / S \ H L R \ N S P E / D \ K (R) | S25 =n,T1 =nf,S14 =nf,S32 =nf | NP_004086.1    | EIF4EBP1    |
| 1108 | ELX  | 5  | ETD                             | 12.22 | 1 (K)T P P   R   D / L P / T / I P / G V T S P S / S D / E / P P m E A s / Q / S H \ L R N S P / E   D \ K (R)         | S25 =n,T1 =nf,S14 =nf,S32 =nf | NP_004086.1    | EIF4EBP1    |
| 1109 | EL   | 4  | ETD                             | 20.92 | 1 (K)D / R   D   D   R   S   F   G   R   D R   N R D s \ D \ K (T)                                                     | S15 =n                        | NP_001408.2    | EIF4B       |
| 1110 | ELX  | 4  | ETD                             | 24.92 | 1 (K)E / E   D \ C   H   s P   T   S K P P   K P   D   Q P \ L \ K (V)                                                 | S6 =n                         | NP_001408.2    | EIF4B       |
| 1111 | EL   | 4  | ETD                             | 19.02 | 1 (K)E / E   D \ C   H   S P t \ S \ K P P   K P   D   Q P \ L \ K (V)                                                 | T8 =n                         | NP_001408.2    | EIF4B       |
| 1112 | ELX  | 4  | ETD                             | 22.78 | 1 (K)R / S \ S N P P / A \ R s Q S \ S \ D \ T   E   Q \ Q   S P T   S   G   G G \ K (V)                               | S9 =n,S12 =nf,S18 =nf         | NP_001408.2    | EIF4B       |
| 1113 | ELX  | 5  | ETD                             | 17.58 | 1 (K)S / L E / N / E / T / L N K   E   E   D \ C H   S P t \ S K P P \ K P D   Q P \ L \ K (V)                         | T17 =n                        | NP_001408.2    | EIF4B       |

| #    | Exp. | CS | Mode | Score | Number of phosphorylation sites<br>▼ Sequence with fragments                                                    | Literature lookup      | RefSeq#     | Gene Symbol |
|------|------|----|------|-------|-----------------------------------------------------------------------------------------------------------------|------------------------|-------------|-------------|
| 1114 | ET   | 5  | ETD  | 14.82 | 1 (K)S/L E N E T   L N K   E \ E   D \ C H   s / P   T \ S / K P / P   K P D   Q P \ L \ K (V)                  | S15 =n                 | NP_001408.2 | EIF4B       |
| 1115 | AG   | 3  | CID  | 22.78 | 1 (E)L V/T/K   P V \ G G N   Y   G \ K \ Q   P L   L   L   s E \ D \ E \ E (D)                                  | S18 =n                 | NP_003743.1 | EIF3S8      |
| 1116 | AG   | 3  | CID  | 15.29 | 1 (E)S H I T S Y \ K \ Q \ N   P E Q   s A   D \ E (D)                                                          | S13 =k                 | NP_003743.1 | EIF3S8      |
| 1117 | CL   | 2  | CID  | 13.23 | 1 (K)Q/N/P/E Q/s A/D/E   D/A E K(N)                                                                             | S6 =k                  | NP_003743.1 | EIF3S8      |
| 1118 | CG   | 2  | CID  | 16.68 | 1 (E)L L K/G I   P/L   A   T G D   t S/P E \ P E(L)                                                             | T12 =k,S13 =nf         | NP_003746.2 | EIF3S4      |
| 1119 | CG   | 2  | CID  | 13.79 | 1 (E)L L K/G I   P/L   A   T G D   T s P E \ P E(L)                                                             | S13 =k,T12 =nf         | NP_003746.2 | EIF3S4      |
| 1120 | CT   | 2  | CID  | 11.96 | 1 (R)N/t V S Q S/I/S G D   P \ E / I D/K K(I)                                                                   | T2 =n                  | NP_114414.2 | EIF2A       |
| 1121 | CT   | 3  | CID  | 15.19 | 1 (R)S D K S/P D \ L   A   P / t / P A   P Q \ S T P R(N)                                                       | T10 =n                 | NP_114414.2 | EIF2A       |
| 1122 | ET   | 3  | ETD  | 7.75  | 1 (R)S/D/K s P D   L \ A P   T P   A P Q   S   T P \ R(N)                                                       | S4 =n                  | NP_114414.2 | EIF2A       |
| 1123 | AG   | 5  | CID  | 15.06 | 1 (E)A S K m Q Q S   G \ H P W s \ G / P / K P R / L \ T S S / V / K \ E / L / G / G / V D / L V I E(A)         | S12 =n                 | NP_001957.2 | EHHADH      |
| 1124 | CT   | 2  | CID  | 15.47 | 1 (R)A D L N Q / G / I   G / E   P Q s / P \ S R(R)                                                             | S12 =n                 | NP_077305.2 | EFHD2       |
| 1125 | AT   | 4  | ETD  | 8.8   | 1 (K)M A \ s Q / P / F   G   R / G / A \ m R(E)                                                                 | S3 =n                  | NP_037434.1 | EEF2K       |
| 1126 | ELX  | 4  | ETD  | 26.5  | 1 (K)A/G/I/I/A/S   A/R   A \ G   E / T   R   F \ t \ D \ T   R \ K(D)                                           | T15 =k,T12 =nf,T17 =nf | NP_001952.1 | EEF2        |
| 1127 | AG   | 2  | CID  | 20.16 | 1 (E)D/D D \ I   D   L   F   G   s D N E \ E(E)                                                                 | S9 =n                  | NP_001951.2 | EEF1D       |
| 1128 | AG   | 2  | CID  | 21.92 | 1 (E)D/D D \ I   D   L   F   G   s D   N E \ E \ E(D)                                                           | S9 =n                  | NP_001951.2 | EEF1D       |
| 1129 | CG   | 2  | CID  | 25.29 | 1 (E)D/D D \ I   D   L   F   G / s / D / N E   E   E   D \ K E(A)                                               | S9 =n                  | NP_001951.2 | EEF1D       |
| 1130 | CG   | 3  | CID  | 12.22 | 1 (E)N I/Q K s \ L A \ G \ S / S / G   P G A   S / S G T / S / G D \ H G E(L)                                   | S5 =n                  | NP_001951.2 | EEF1D       |
| 1131 | CL   | 4  | CID  | 23.61 | 1 (K)K P A T \ P A E \ D D \ E \ D   D D \ I \ D   L   F   G / s / D / N \ E   E E \ D K(E)                     | S19 =n                 | NP_001951.2 | EEF1D       |
| 1132 | AL   | 3  | CID  | 23    | 2 (K)K P A t / P A E \ D D E \ D   D D / I   D   L   F   G / s / D / N E / E E \ D K(E)                         | T4 =n,S19 =n           | NP_001951.2 | EEF1D       |
| 1133 | EL   | 4  | ETD  | 22.01 | 1 (K)K P A T P A E \ D \ D \ E \ D   D D I \ D   L F / G   s   D   N   E   E   E   D \ K(E)                     | S19 =n                 | NP_001951.2 | EEF1D       |
| 1134 | EL   | 4  | ETD  | 14.83 | 2 (K)K P A / t P A E / D D E \ D \ D D I D \ L \ F \ G / s   D   N   E   E   E   D K(E)                         | T4 =n,S19 =n           | NP_001951.2 | EEF1D       |
| 1135 | CT   | 4  | CID  | 20.36 | 2 (K)K P A t P A E D D E D D D / I / D   L   F   G / s / D / N \ E / E E D / K / E / A / A Q L R(E)             | T4 =n,S19 =n           | NP_001951.2 | EEF1D       |
| 1136 | CT   | 4  | CID  | 19.55 | 1 (K)K P A T \ P A E D / D E D D / D   I   D   L   F   G / s / D / N E E E D K / E / A A Q L R(E)               | S19 =n                 | NP_001951.2 | EEF1D       |
| 1137 | ET   | 4  | ETD  | 7.25  | 1 (K)K P A / t / P A E D / D E D D D I D L \ F G S D N E E E D / K   E   A   A   Q \ L \ R(E)                   | T4 =n                  | NP_001951.2 | EEF1D       |
| 1138 | AT   | 5  | CID  | 16.07 | 1 (K)K P A T \ P A E / D D E / D / D   D   I   D L / F   G / s D / N E E E D K E A A Q L R E / E R(L)           | S19 =n                 | NP_001951.2 | EEF1D       |
| 1139 | ET   | 5  | ETD  | 12.82 | 1 (K)K P A \ T / P   A E   D   D E D \ D D I D / L F G s D / N E / E E D / K   E   A A \ Q L / R   E / E \ R(L) | S19 =n                 | NP_001951.2 | EEF1D       |
| 1140 | AL   | 5  | ETD  | 28.54 | 1 (K)S/S P G   H   R / A / T A P / Q T   Q   H   V   s P   M   R   Q \ V   E P P A \ K(K)                       | S16 =k                 | NP_001951.2 | EEF1D       |
| 1141 | AL   | 5  | ETD  | 23.85 | 1 (K)S/S P G   H   R / A \ T \ A P \ Q T / Q / H / V   s P \ m   R   Q V   E P P A \ K(K)                       | S16 =k                 | NP_001951.2 | EEF1D       |
| 1142 | EL   | 5  | ETD  | 22.72 | 1 (K)S/S P G   H   R \ A \ T \ A P Q T   Q \ H \ V   s P   M   R   Q \ V   E P P \ A \ K(K)                     | S16 =k                 | NP_001951.2 | EEF1D       |
| 1143 | EL   | 5  | ETD  | 14.85 | 2 (K)S/s P G H \ R / A \ T   A P   Q   T   Q   H \ V   s P M \ R / Q \ V \ E P \ P \ A \ K(K)                   | S2 =n,S16 =k           | NP_001951.2 | EEF1D       |
| 1144 | CL   | 5  | CID  | 11.59 | 1 (K)S S P G H R A T A / P / Q \ T Q   H   V   s P \ M R Q V / E / P P A K(K)                                   | S16 =k                 | NP_001951.2 | EEF1D       |
| 1145 | AL   | 4  | CID  | 11.06 | 1 (K)S S P G H / R / A T / A / P Q T Q   H \ V   s / P M \ R / Q \ V E / P P A K(K)                             | S16 =k                 | NP_001951.2 | EEF1D       |
| 1146 | EL   | 4  | ETD  | 7.91  | 2 (K)S/S P G H R A T A P / Q \ t Q H V s P m R   Q   V / E P P   A \ K(K)                                       | T12 =n,S16 =k          | NP_001951.2 | EEF1D       |

| #    | Exp. | CS | Number of phosphorylation sites |       | Sequence with fragments                                               | Literature lookup  | RefSeq#     | Gene Symbol |
|------|------|----|---------------------------------|-------|-----------------------------------------------------------------------|--------------------|-------------|-------------|
|      |      |    | Mode                            | Score |                                                                       |                    |             |             |
| 1147 | CT   | 3  | CID                             | 17.49 | 1 (R)A T A/P/Q T Q H V s/P m R(Q)                                     | S10 =k             | NP_001951.2 | EEF1D       |
| 1148 | AT   | 3  | ETD                             | 16.64 | 1 (R)A T/A P Q T Q H V s/P\m\R(Q)                                     | S10 =k             | NP_001951.2 | EEF1D       |
| 1149 | ET   | 3  | ETD                             | 15.97 | 1 (R)A/T/A P Q T Q H V s P M\R(Q)                                     | S10 =k             | NP_001951.2 | EEF1D       |
| 1150 | CT   | 3  | CID                             | 14.85 | 1 (R)A T A/P/Q T Q/H V s/P\M\R(Q)                                     | S10 =k             | NP_001951.2 | EEF1D       |
| 1151 | AT   | 3  | CID                             | 13.84 | 1 (R)A/T A/P/Q T Q/H V s/P m R(Q)                                     | S10 =k             | NP_001951.2 | EEF1D       |
| 1152 | CL   | 2  | CID                             | 18.43 | 1 (K)D/D D D\I\D\L F G/s D D\E/E/E/S E E A K(R)                       | S10 =k,S16 =nf     | NP_001950.1 | EEF1B2      |
| 1153 | EL   | 4  | ETD                             | 25.57 | 1 (K)R/L R E E R L A Q Y E s\K(K)                                     | S12 =n             | NP_001950.1 | EEF1B2      |
| 1154 | CL   | 4  | CID                             | 14.23 | 1 (K)R L R E E R L A\Q\y\E S K(K)                                     | Y10 =n             | NP_001950.1 | EEF1B2      |
| 1155 | CT   | 3  | CID                             | 16.46 | 1 (K)S s/I/L/L/D V K/P W D D/E/T D/m A K(L)                           | S2 =n              | NP_001950.1 | EEF1B2      |
| 1156 | EL   | 3  | ETD                             | 13.34 | 1 (K)S/s I L L D V K\p W D D E T D M\A\K(L)                           | S2 =n              | NP_001950.1 | EEF1B2      |
| 1157 | AL   | 2  | CID                             | 21.11 | 1 (K)Y G/P/A/D V/E D T/T/G/S\G A/T D\s K(D)                           | S17 =n             | NP_001950.1 | EEF1B2      |
| 1158 | CL   | 2  | CID                             | 12.16 | 1 (K)Y G/P/A D\V E/D T/T/G S G A t D S K(D)                           | T15 =n             | NP_001950.1 | EEF1B2      |
| 1159 | CT   | 4  | CID                             | 13.13 | 1 (R)E H A L/L A Y T L G V K Q/L\I\V G/V N\K\m/D S T/E P/P y S Q K(R) | Y28 =n             | NP_001393.1 | EEF1A1      |
| 1160 | CT   | 3  | CID                             | 8.43  | 1 (K)S V s T/P S\E A G S Q D S G D G A V G\S R(T)                     | S3 =n              | NP_001369.1 | DYNC112     |
| 1161 | ELX  | 2  | ETD                             | 6.58  | 1 (K)S P A\s/K L D\K\S\K(R)                                           | S4 =n              | NP_056363.2 | DST         |
| 1162 | ELX  | 4  | ETD                             | 10.12 | 1 (K)T t/I/K E I\S/m\Q K(E)                                           | T2 =n              | NP_004406.2 | DSP         |
| 1163 | EG   | 5  | ETD                             | 17.03 | 1 (E)C K/T V/A L/K R/R K A s S R L E(N)                               | S12 =n             | NP_001929.1 | DR1         |
| 1164 | CT   | 3  | CID                             | 16.15 | 2 (K)E/m/G t/P L/A/D/t/P T R P\V\T R(H)                               | T4 =n,T9 =n        | NP_064519.2 | DPYSL5      |
| 1165 | CT   | 3  | CID                             | 15.88 | 1 (K)E m/G T/P/L/A/D t/P T R/P\V\T R(H)                               | T9 =n              | NP_064519.2 | DPYSL5      |
| 1166 | ET   | 3  | ETD                             | 13.33 | 1 (K)E/m G T P L A D T P t\R P/V T R(H)                               | T11 =n             | NP_064519.2 | DPYSL5      |
| 1167 | ET   | 4  | ETD                             | 16.45 | 1 (R)D L H E S S F s L S G/S Q I/D D H V P\K(R)                       | S8 =n              | NP_064519.2 | DPYSL5      |
| 1168 | ELX  | 5  | ETD                             | 26.56 | 1 (K)R G\A P D P R V D D D s/L G\E F P V T N S R A R\K(R)             | S12 =k             | NP_006259.1 | DPF2        |
| 1169 | ET   | 4  | ETD                             | 16.27 | 2 (R)A/H P P E\D P R L s F\p/s I K P D T D\Q T\L\K(K)                 | S10 =n,S13 =n      | NP_006259.1 | DPF2        |
| 1170 | EL   | 4  | ETD                             | 13.75 | 1 (K)S/D/G E A K/P\E P S P\s/P R\I\T R\K(S)                           | S12 =n             | NP_001370.1 | DNMT1       |
| 1171 | CL   | 2  | CID                             | 17.22 | 1 (K)E L/G/L/D E/G/V/D/s L K(A)                                       | S10 =n             | NP_056005.1 | DNAJC9      |
| 1172 | EL   | 2  | ETD                             | 13.67 | 1 (K)E/L/G/L/D/E/G/V D s\L\K(A)                                       | S10 =n             | NP_056005.1 | DNAJC9      |
| 1173 | ELX  | 4  | ETD                             | 23.92 | 1 (K)N/F E/E/s R/D G R\V\D/S W R N F Q A N\T K(G)                     | S5 =n              | NP_055095.1 | DNAJC8      |
| 1174 | EL   | 4  | ETD                             | 10.15 | 2 (K)R/K/R/E s E s\E S D E T P P\A A P Q L\I\K(K)                     | S5 =n,S7 =k,S9 =nf | NP_001354.1 | DKC1        |
| 1175 | CL   | 3  | CID                             | 14.32 | 1 (K)K/t H K/N I M/I/N L m D I L\E\V D\T K(K)                         | T2 =n              | NP_055577.1 | DHCR24      |
| 1176 | EG   | 3  | ETD                             | 18.02 | 1 (E)F/A/K L T V E N/s P K\Q\E(A)                                     | S9 =n              | NP_003668.2 | DENR        |
| 1177 | CL   | 3  | CID                             | 17.44 | 1 (K)L t V E/N/S/P K\Q E A\G I S/E/G Q/G/T A G E/E E E\K(K)           | T2 =n              | NP_003668.2 | DENR        |
| 1178 | ELX  | 4  | ETD                             | 14.14 | 1 (K)L/T/V\E\N\s P K Q E A G I/S\E G/Q G\T A G E E E E\K(K)           | S6 =n              | NP_003668.2 | DENR        |
| 1179 | CL   | 3  | CID                             | 15.45 | 1 (K)E P E m/P/G P R E E s E E E\E/D/E/D/D/E/E/E E E E K(E)           | S11 =n             | NP_003463.1 | DEK         |
| 1180 | ELX  | 4  | ETD                             | 25.28 | 3 (K)N/K E E s s D D E D K\E s E E P P K\K(T)                         | S5 =n,S6 =n,S13 =n | NP_003463.1 | DEK         |
| 1181 | ELX  | 4  | ETD                             | 20.91 | 2 (K)N/K/E E s s D D\E D K E S/E E E P P K\K(T)                       | S5 =n,S6 =n        | NP_003463.1 | DEK         |

| #    | Exp. | CS | Number of phosphorylation sites |       | Sequence with fragments                                         | Literature lookup    | RefSeq#        | Gene Symbol |
|------|------|----|---------------------------------|-------|-----------------------------------------------------------------|----------------------|----------------|-------------|
|      |      |    | Mode                            | Score |                                                                 |                      |                |             |
| 1182 | EL   | 4  | ETD                             | 17.95 | 2 (K)R/G G F N t F R D R E N\Y D R\G\Y\S/s L\L\K(R)             | T6 =n,S19 =n         | NP_004387.1    | DDX5        |
| 1183 | EL   | 3  | ETD                             | 12.95 | 1 (K)D/A/Y S/S F G S R S D s R\G\K(S)                           | S12 =n,Y3 =nf,S8 =nf | NP_001347.2    | DDX3X       |
| 1184 | EL   | 3  | ETD                             | 8.97  | 2 (K)D/A Y/S/S F G s\R s\D S R\G\K(S)                           | S8 =k,S10 =n,Y3 =nf  | NP_001347.2    | DDX3X       |
| 1185 | EL   | 3  | ETD                             | 11    | 1 (K)F/E/R/G G N s R\W\C D\K(S)                                 | S7 =n                | NP_001347.2    | DDX3X       |
| 1186 | AL   | 3  | CID                             | 16.31 | 1 (K)K A E P\S E V D M/N s P K(S)                               | S11 =k               | NP_004719.2    | DDX21       |
| 1187 | AL   | 3  | ETD                             | 9.1   | 1 (K)K/K E E P S Q N D\I s P\K(T)                               | S11 =k               | NP_004719.2    | DDX21       |
| 1188 | EL   | 4  | ETD                             | 8.99  | 1 (K)K V T\K/N E E\p s/E/E/E I\D A P/K P\K(K)                   | S9 =k                | NP_004719.2    | DDX21       |
| 1189 | EL   | 3  | ETD                             | 17.24 | 1 (K)N/E E P s E E\E I D A P K\K(K)                             | S5 =k                | NP_004719.2    | DDX21       |
| 1190 | CL   | 3  | CID                             | 16.96 | 1 (K)N E E P/s E\E E I/D A/P\K P K(K)                           | S5 =k                | NP_004719.2    | DDX21       |
| 1191 | ELX  | 4  | ETD                             | 6.77  | 2 (K)K G\K\T t I K t G/A S/V/L\N K(W)                           | T5 =n,T8 =n          | NP_004930.1    | DDX1        |
| 1192 | EL   | 3  | ETD                             | 10.51 | 3 (K)E/R A/M/s T\T s I S s P Q P G\K(L)                         | S5 =n,S8 =n,S11 =n   | NP_001014436.1 | DBNL        |
| 1193 | EL   | 3  | ETD                             | 8.65  | 1 (K)L/R s P\F L Q\K(Q)                                         | S3 =k                | NP_001014436.1 | DBNL        |
| 1194 | ET   | 3  | ETD                             | 12.17 | 1 (K)Q L t Q P E T H F G\R(E)                                   | T3 =n                | NP_001014436.1 | DBNL        |
| 1195 | EL   | 3  | ETD                             | 15.17 | 1 (K)R V G K D s F W A\K(A)                                     | S6 =n                | NP_001014436.1 | DBNL        |
| 1196 | ET   | 3  | ETD                             | 7.19  | 1 (R)L/S s\p V L\H\R(L)                                         | S3 =k,S2 =nf         | NP_004386.2    | DBN1        |
| 1197 | ET   | 3  | ETD                             | 13.89 | 1 (R)S P/S D S S T A S t P V\A E Q I E\R(A)                     | T10 =k,S3 =nf,S6 =nf | NP_004386.2    | DBN1        |
| 1198 | ET   | 5  | ETD                             | 13.12 | 1 (K)K/Q/T\G\S\G P L/G N S/y/V\E/R(Q)                           | Y12 =n               | NP_001341.1    | DAXX        |
| 1199 | ELX  | 5  | ETD                             | 22.93 | 1 (K)H P s P R T Q H I Q Q P R\K(-)                             | S3 =n                | NP_004385.1    | DAP         |
| 1200 | EL   | 5  | ETD                             | 19.96 | 2 (K)R M/H/I\E K D\E\T P L s\T\p/T A R\D S\L D\K(L)             | T9 =n,S12 =n         | NP_542937.1    | DACH1       |
| 1201 | EL   | 5  | ETD                             | 16.09 | 2 (K)R m H I E K D E\T P/L/s T P t A R D/S L\D\K(L)             | S12 =n,T15 =n        | NP_542937.1    | DACH1       |
| 1202 | ELX  | 3  | ETD                             | 14.41 | 1 (K)H C/s Q V\D\S/V R G F G G\K(F)                             | S3 =n                | NP_005222.2    | CTTN        |
| 1203 | ELX  | 3  | ETD                             | 11.04 | 2 (K)H C\s Q V D/s V\R G F G G\K(F)                             | S3 =n,S7 =n          | NP_005222.2    | CTTN        |
| 1204 | CT   | 3  | CID                             | 19.01 | 2 (K)T Q t P/P V s P/A P Q/P T E/E R(L)                         | T3 =k,S7 =k          | NP_005222.2    | CTTN        |
| 1205 | AT   | 2  | CID                             | 16.47 | 2 (K)t Q T P/P V s/P/A/P Q P T E E R(L)                         | T1 =n,S7 =k,T3 =nf   | NP_005222.2    | CTTN        |
| 1206 | ET   | 3  | ETD                             | 11.2  | 2 (K)t Q T P P/V s P A/P Q P T E E\R(L)                         | T1 =n,S7 =k,T3 =nf   | NP_005222.2    | CTTN        |
| 1207 | CT   | 3  | CID                             | 18.1  | 2 (R)A K/t Q T P P V s P/A P\Q/P\T E/E R(L)                     | T3 =n,S9 =k,T5 =nf   | NP_005222.2    | CTTN        |
| 1208 | AT   | 3  | ETD                             | 10.52 | 2 (R)A/K t Q T P P V s P A P Q P T E E\R(L)                     | T3 =n,S9 =k,T5 =nf   | NP_005222.2    | CTTN        |
| 1209 | CT   | 2  | CID                             | 15.56 | 2 (R)L P/s S/P/V/y E/D A/A/S F K(A)                             | S3 =n,Y7 =k,S4 =nf   | NP_005222.2    | CTTN        |
| 1210 | AL   | 4  | CID                             | 17.32 | 2 (K)N L G/G L E t E D\D\Y S Y Q G H m/Q s C N F S\A E K A K(V) | T7 =n,S19 =n         | NP_003784.2    | CTSF        |
| 1211 | EG   | 4  | ETD                             | 21.71 | 1 (E)A/T/F S N P K T t/s P N K G/K E K\E(A)                     | T9 =n                | NP_001007554.1 | CSDE1       |
| 1212 | EG   | 4  | ETD                             | 18.92 | 1 (E)A/T/F S N P K T T s P N K G K E K E A\E(D)                 | S10 =n               | NP_001007554.1 | CSDE1       |
| 1213 | CL   | 3  | CID                             | 13.32 | 1 (K)L Q R D/F/N s/E/L/L R\L R\Q/H W\K\L R\K(V)                 | S7 =n                | NP_004259.3    | CRSP6       |
| 1214 | CG   | 3  | CID                             | 17.49 | 2 (E)t/V P/G G/Q A/Q t G A\S\T\E/S G R\Q\E(W)                   | T1 =n,T9 =n          | NP_057274.1    | CRNN        |
| 1215 | AT   | 4  | CID                             | 14.03 | 3 (K)T S A V/N y M t\Q V/V R C D t K(M)                         | Y6 =n,T8 =n,T15 =n   | NP_113664.1    | CRISPLD2    |
| 1216 | ELX  | 3  | ETD                             | 6.05  | 1 (K)G/T/s G N R G L Q G E\K(G)                                 | S3 =n                | NP_056534.1    | COL5A3      |

| #    | Exp. | CS | Number of phosphorylation sites |       | Sequence with fragments                                                                                       | Literature lookup   | RefSeq#     | Gene Symbol |
|------|------|----|---------------------------------|-------|---------------------------------------------------------------------------------------------------------------|---------------------|-------------|-------------|
|      |      |    | Mode                            | Score |                                                                                                               |                     |             |             |
| 1217 | ELX  | 5  | ETD                             | 8.11  | 1 (K)N S I/A y m/D Q/A S/G N V K K(A)                                                                         | Y5 =n               | NP_000081.1 | COL3A1      |
| 1218 | AL   | 3  | CID                             | 13.16 | 1 (K)R A/F Q L E E G E E t E P D/C\K(Y)                                                                       | T11 =k              | NP_004636.1 | COIL        |
| 1219 | CT   | 3  | CID                             | 15.83 | 1 (K)L T L/Q P/V/D N\ S T I s\L/Q/m\G\T N\K(V)                                                                | S12 =n              | NP_001830.1 | CNN3        |
| 1220 | CT   | 3  | CID                             | 24.79 | 1 (K)F E E E S K E P/V A\D\E\E E D s D\D D V E P I T E/F R(F)                                                 | S17 =n              | NP_001284.1 | CLNS1A      |
| 1221 | ET   | 4  | ETD                             | 11.49 | 1 (R)G S K G G H/G A A/s/P/S E K(G)                                                                           | S10 =n              | NP_006816.2 | CKAP4       |
| 1222 | CL   | 3  | CID                             | 17.09 | 1 (K)K/s S P S\V K P/A/V/D P A A A K(L)                                                                       | S2 =n               | NP_064709.1 | CIAPIN1     |
| 1223 | EL   | 3  | ETD                             | 16.89 | 1 (K)S/S P s V\K P\A V\D P A A\A\K(L)                                                                         | S4 =n               | NP_064709.1 | CIAPIN1     |
| 1224 | CL   | 3  | CID                             | 14.31 | 1 (K)S S P/s V K P A\V/D P A A A K(L)                                                                         | S4 =n               | NP_064709.1 | CIAPIN1     |
| 1225 | CL   | 2  | CID                             | 12.84 | 1 (K)V/L L/S/D/s/N L/H D\A(-)                                                                                 | S6 =n               | NP_064709.1 | CIAPIN1     |
| 1226 | AL   | 5  | CID                             | 12.49 | 1 (K)Q L T M V E K R M\L M K F L T/F C m/E/y E K(Y)                                                           | Y20 =n              | NP_000381.1 | CHM         |
| 1227 | EL   | 3  | ETD                             | 19.34 | 1 (K)R/M s P K P E L T E E Q\K(Q)                                                                             | S3 =n               | NP_004335.1 | CETN2       |
| 1228 | ET   | 3  | ETD                             | 19.01 | 1 (K)R m s P K P E L T E E Q K(Q)                                                                             | S3 =n               | NP_004335.1 | CETN2       |
| 1229 | CT   | 4  | CID                             | 16.06 | 1 (K)R m\s/P K P/E/L/T E E\Q K Q E I R(E)                                                                     | S3 =n               | NP_004335.1 | CETN2       |
| 1230 | ET   | 4  | ETD                             | 20.74 | 1 (R)K/R m/s P K P E L T E/E Q K(Q)                                                                           | S4 =n               | NP_004335.1 | CETN2       |
| 1231 | ET   | 4  | ETD                             | 9.25  | 1 (R)K/R m/s P K P\E L T E\E Q\K(Q)                                                                           | S4 =n               | NP_004335.1 | CETN2       |
| 1232 | ET   | 3  | ETD                             | 8.95  | 1 (R)m/s P K P E\L\T E E Q\K(Q)                                                                               | S2 =n               | NP_004335.1 | CETN2       |
| 1233 | ET   | 4  | ETD                             | 11.98 | 1 (R)m/s P\K P/E\L/T E E Q K Q E I\ R(E)                                                                      | S2 =n               | NP_004335.1 | CETN2       |
| 1234 | ET   | 3  | ETD                             | 10.39 | 3 (K)R/D A N s/S F\F D\N\s/S s P\H L L D Q\L K(A)                                                             | S5 =n,S11 =n,S13 =n | NP_057427.3 | CENPF       |
| 1235 | ELX  | 5  | ETD                             | 20.4  | 1 (K)E/R/s N R A A S A A G\A A G/S/A G\G\S\G A A G A/A G G\G A G A G/T R P G\D G G\T A\S A\G A A G\A\A T\K(A) | S3 =n               | NP_060018.1 | CDV3        |
| 1236 | ELX  | 3  | ETD                             | 22.45 | 1 (K)L/Q L\D N Q y A V L E N Q\K(S)                                                                           | Y7 =k               | NP_060018.1 | CDV3        |
| 1237 | ELX  | 3  | ETD                             | 16.23 | 1 (K)T P Q/G P P\E I y S D T Q F P/S\L/Q/S T/A K(H)                                                           | Y9 =k               | NP_060018.1 | CDV3        |
| 1238 | ELX  | 3  | ETD                             | 13.72 | 2 (K)T P Q G\ P P E\I\y S\D T\Q\F P s/L Q S T/A K(H)                                                          | Y9 =k,S16 =n        | NP_060018.1 | CDV3        |
| 1239 | AL   | 2  | CID                             | 15.99 | 1 (K)L/T/A E A I Q t/P L K(S)                                                                                 | T8 =n               | NP_060571.1 | CDC48       |
| 1240 | AL   | 4  | CID                             | 15.36 | 1 (K)T P/G L R T P A/A G E R I\Y\N\I S G\N G s/P/L A D\S K(E)                                                 | S21 =k              | NP_060571.1 | CDC48       |
| 1241 | CL   | 2  | CID                             | 11.68 | 1 (K)I/G E/G/T/y/G\V/V/Y K(A)                                                                                 | Y6 =k,T5 =nf        | NP_001249.1 | DK3         |
| 1242 | EL   | 2  | ETD                             | 10.06 | 2 (K)I/G/E/G/t/y/G V\V\Y\K(A)                                                                                 | T5 =k,Y6 =k         | NP_001249.1 | DK3         |
| 1243 | ET   | 3  | ETD                             | 18.43 | 1 (K)H S L D s D E E/E D D D D G G S S K(Y)                                                                   | S5 =n               | NP_006101.1 | CD2BP2      |
| 1244 | EL   | 3  | ETD                             | 10.18 | 1 (K)G/R K\E s A Q P P\A H\L(-)                                                                               | S5 =n               | NP_005116.1 | CCS         |
| 1245 | CT   | 2  | CID                             | 13.95 | 2 (K)L D/Q P V s A P P/s/P R(D)                                                                               | S6 =k,S10 =k        | NP_005427.2 | CCDC6       |
| 1246 | CT   | 2  | CID                             | 18.51 | 1 (R)A/E/Q E E/E F/I S N t/L F K(K)                                                                           | T11 =n              | NP_005427.2 | CCDC6       |
| 1247 | CL   | 3  | CID                             | 21.75 | 1 (K)A A L/L/A Q Y A D V\ t D E E D E A D E K(D)                                                              | T11 =n              | NP_653210.1 | CCDC43      |
| 1248 | ET   | 3  | ETD                             | 7.02  | 1 (R)L/y L L R/H F R K Q T E L R R(S)                                                                         | Y2 =n               | NP_056254.1 | CCDC28A     |
| 1249 | EG   | 5  | ETD                             | 18.73 | 1 (E)S N/K/R K s N F S/N S/A\D D I K\S K\K K R\E(Q)                                                           | S6 =n               | NP_036249.1 | CBX5        |
| 1250 | ELX  | 5  | ETD                             | 17.26 | 1 (K)K/R E Q s N/D I A R/G F E/R G\L\E P E K(I)                                                               | S5 =n               | NP_036249.1 | CBX5        |

| #    | Exp. | CS | Number of phosphorylation sites |       | Sequence with fragments                                         | Literature lookup       | RefSeq#        | Gene Symbol |
|------|------|----|---------------------------------|-------|-----------------------------------------------------------------|-------------------------|----------------|-------------|
|      |      |    | Mode                            | Score |                                                                 |                         |                |             |
| 1251 | ELX  | 3  | ETD                             | 22.59 | 1 (K)R/K s N F S N S A D D I\K(S)                               | S3 =n                   | NP_036249.1    | CBX5        |
| 1252 | ELX  | 3  | ETD                             | 10.34 | 4 (K)R t A D s s s s E\D\E E E Y V V E K(V)                     | T2 =n,S5 =n,S7 =n,S8 =n | NP_036249.1    | CBX5        |
| 1253 | EG   | 5  | ETD                             | 22.98 | 1 (E)A/F/L N/S/Q/K A G K E/K D G T K R K s L S D\s\E(S)         | S19 =k,S21 =nf          | NP_009207.2    | CBX3        |
| 1254 | ET   | 3  | ETD                             | 26.06 | 1 (K)R K s L/S/D S E/S D D S K(S)                               | S3 =k,S5 =nf            | NP_009207.2    | CBX3        |
| 1255 | EL   | 3  | ETD                             | 15.06 | 2 (K)R/K s L\s D S E S D D S\K(S)                               | S3 =k,S5 =k             | NP_009207.2    | CBX3        |
| 1256 | CT   | 3  | CID                             | 20.92 | 1 (R)A s L E/N V/H P P I/A P P T/E/I/P E\R(F)                   | S2 =n                   | NP_079090.1    | CBLL1       |
| 1257 | ELX  | 3  | ETD                             | 8.77  | 1 (K)S L/T P A V P V E\s K P D K P S\G\K(S)                     | S10 =n                  | NP_001741.3    | CAST        |
| 1258 | CT   | 3  | CID                             | 19.05 | 3 (R)E R s/P s P/L R/G N/V V P s/P L/P T\R(R)                   | S3 =n,S5 =n,S14 =n      | NP_055131.1    | CARHSP1     |
| 1259 | CT   | 2  | CID                             | 13.59 | 1 (R)G N\V V P s/P L P T R(R)                                   | S6 =n                   | NP_055131.1    | CARHSP1     |
| 1260 | EL   | 3  | ETD                             | 17.44 | 1 (K)N/P S L R/A Q G G Q T Q s P\T\K(S)                         | S13 =n                  | NP_006357.1    | CAP2        |
| 1261 | AT   | 3  | ETD                             | 15.67 | 1 (R)V/F/D\K D G N G Y I S A A E L\R(H)                         | Y9 =k                   | NP_001734.1    | 2CALM3      |
| 1262 | AT   | 3  | CID                             | 14.17 | 1 (R)V F D/K D G/N/G\Y I S A A/E/L R(H)                         | Y9 =k                   | NP_001734.1    | 2CALM3      |
| 1263 | ELX  | 4  | ETD                             | 27.18 | 1 (K)H T E N T F S R\p G G R A s V D T\K(E)                     | S14 =n                  | NP_004333.1    | CALD1       |
| 1264 | ELX  | 4  | ETD                             | 24.19 | 1 (K)T P D/G N K s P A P K P S D/L/R P\G D\V S\S\K(R)           | S7 =k                   | NP_004333.1    | CALD1       |
| 1265 | ELX  | 4  | ETD                             | 9.36  | 1 (K)T/P\D G/N\K/S P A P K P s D L/R P\G D V/S S\K(R)           | S13 =n,S7 =nf           | NP_004333.1    | CALD1       |
| 1266 | ET   | 4  | ETD                             | 15.94 | 1 (K)I/Y/E D G D D D m K R\t I\N\K(A)                           | T12 =n                  | NP_001007215.1 | CACYBP      |
| 1267 | EL   | 3  | ETD                             | 5.72  | 2 (K)K/s s G/S G/D K(C)                                         | S2 =n,S3 =n             | NP_619584.1    | CABYR       |
| 1268 | ET   | 3  | ETD                             | 11.01 | 1 (K)N/A/E D C/L y E L P E N I R(V)                             | Y7 =n                   | NP_057566.1    | C9orf78     |
| 1269 | ET   | 4  | ETD                             | 16.5  | 1 (R)V/G/D T/E K P E P\E R s P P\N\R(K)                         | S12 =n                  | NP_057604.1    | C9orf78     |
| 1270 | CT   | 3  | CID                             | 16.03 | 2 (K)R I D F I P/V s P A P S P t R(G)                           | S8 =n,T14 =n            | NP_612206.3    | C9orf42     |
| 1271 | CG   | 2  | CID                             | 18.8  | 1 (E)A D/P/P G Q V A A s/P D P\T\T(-)                           | S10 =n                  | NP_006434.1    | C6orf108    |
| 1272 | ET   | 4  | ETD                             | 11.3  | 2 (K)L/t/E G E Q D\E/A s/N/A/A/M L L\E\K(E)                     | T2 =n,S10 =n            | NP_203528.2    | C3orf15     |
| 1273 | AG   | 5  | ETD                             | 10.35 | 2 (E)L H\H\E\S/G Q y Q M E/Q N G/S P T/S\S K/s R\K G E(A)       | Y8 =n,S21 =n            | NP_653230.1    | C2orf11     |
| 1274 | EL   | 3  | ETD                             | 11.34 | 1 (K)L/S/M E D S K s P P P\K(A)                                 | S8 =n                   | NP_067038.1    | C20orf77    |
| 1275 | ELX  | 5  | ETD                             | 15.99 | 3 (K)Q/P/E T/P K s\W E N N\V E s/Q\K\H S L\t/S Q S Q/I\s P\K(S) | S7 =n,S14 =n,T20 =n     | NP_001002259.1 | C1QDC1      |
| 1276 | CL   | 3  | CID                             | 13.79 | 1 (K)A/R L L P E\G/E E T\L E s D\D\E\K(D)                       | S13 =n                  | NP_932343.1    | C1orf52     |
| 1277 | ELX  | 3  | ETD                             | 10.62 | 1 (K)A/R/L\L P E G E\E\T L E\s/D D\E\K(D)                       | S13 =n                  | NP_932343.1    | C1orf52     |
| 1278 | ELX  | 4  | ETD                             | 17.22 | 1 (K)A/R/L L P E G/E/E T L E s/D/D E K D\E H T\S\K(K)           | S13 =n                  | NP_932343.1    | C1orf52     |
| 1279 | ET   | 4  | ETD                             | 26.29 | 1 (R)L/L P E\G E E T L E s D D E K D E H T\S\K(K)               | S11 =n                  | NP_932343.1    | C1orf52     |
| 1280 | ELX  | 4  | ETD                             | 23.25 | 2 (K)A R/S C\s A A R\A A s\A\Q E V A\G S T S\A\K(T)             | S5 =n,S11 =n            | NP_997239.1    | C1orf174    |
| 1281 | ELX  | 4  | ETD                             | 19.64 | 2 (K)R/P T s N G V\V S s P N\S/T\S R P/T L P\V\K(S)             | S4 =n,S10 =n            | BAC77399.1     | C1orf144    |
| 1282 | ELX  | 4  | ETD                             | 19.28 | 1 (K)R/P T S N G V V\S s P N S T S R P/T L P\V\K(S)             | S10 =n                  | BAC77399.1     | C1orf144    |
| 1283 | CL   | 3  | CID                             | 20    | 1 (K)V/Y E/D S G I P L P/A E/s P K K(G)                         | S13 =n                  | NP_777553.1    | C17orf49    |
| 1284 | AL   | 3  | ETD                             | 19.32 | 1 (K)V/Y/E D/S/G I/P L/P A E s P K\K(G)                         | S13 =n                  | NP_777553.1    | C17orf49    |
| 1285 | CT   | 2  | CID                             | 14.34 | 1 (R)D/L F S L/D/S/E D P/S P A s/P P L R(S)                     | S14 =k                  | NP_078792.1    | C16orf53    |

| #    | Exp. | CS | Number of phosphorylation sites |       | Sequence with fragments                                                                                                                | Literature lookup           | RefSeq#     | Gene Symbol |
|------|------|----|---------------------------------|-------|----------------------------------------------------------------------------------------------------------------------------------------|-----------------------------|-------------|-------------|
|      |      |    | Mode                            | Score |                                                                                                                                        |                             |             |             |
| 1286 | ELX  | 3  | ETD                             | 22.42 | 1 (K)A/A/R s I P/A G A E P\G E\K(G)                                                                                                    | S4 =n                       | NP_653171.1 | C16orf34    |
| 1287 | ELX  | 4  | ETD                             | 29.82 | 1 (K)A A/R S I/P\A G A E P G E K\G s A R\K(A)                                                                                          | S16 =n                      | NP_653171.1 | C16orf34    |
| 1288 | ELX  | 3  | ETD                             | 13.07 | 1 (K)D/H V\F\L C E/G/E E P K s/D L\K(A)                                                                                                | S13 =n                      | NP_653171.1 | C16orf34    |
| 1289 | AL   | 3  | CID                             | 15.16 | 1 (K)s F G R Y P S L M/E N N N m R\I\Q/D T L D L V M\K(T)<br>(K)S F G R/Y P/S/L M\E N N\N m/R I/Q D T/L D\L V M K t L S\ S H t\ S/C\ P | S1 =n                       | NP_758953.1 | C14orf50    |
| 1290 | AL   | 5  | ETD                             | 9.31  | 3 K(-)                                                                                                                                 | Y5 =n,T26 =n,T31 =n         | NP_758953.1 | C14orf50    |
| 1291 | EL   | 3  | ETD                             | 17.13 | 1 (K)R K/A/s P E\ P P D S\A E G A\L\K(L)                                                                                               | S4 =n                       | NP_078772.1 | C14orf4     |
| 1292 | AL   | 3  | CID                             | 16    | 1 (K)R K A s/P/E P/P/D S A E/G A L\K(L)                                                                                                | S4 =n                       | NP_078772.1 | C14orf4     |
| 1293 | AT   | 3  | CID                             | 17.46 | 2 (K)L/A/P/V/P/s P E/P\Q K P A/P V S\ P E s V K(A)                                                                                     | S6 =k,S19 =n,S16 =nf        | NP_115812.1 | C13orf8     |
| 1294 | ELX  | 3  | ETD                             | 8.11  | 1 (K)S/S/R G/G s P\D L W\K(S)                                                                                                          | S6 =k                       | NP_115812.1 | C13orf8     |
| 1295 | ET   | 4  | ETD                             | 18.45 | 3 (R)K P/G P P L s P E/I R s P A G s P\E L\R(K)                                                                                        | S7 =n,S12 =n,S16 =k         | NP_115812.1 | C13orf8     |
| 1296 | AT   | 2  | CID*                            | 10.9  | 1 (K)A/A/L/L K A/s P K(K)                                                                                                              | S7 =n                       | NP_003449   | BSN         |
| 1297 | AT   | 2  | ETD*                            | 6.2   | 1 (K)A/A/L/L K A/s P K(K)                                                                                                              | S7 =n                       | NP_003449   | BSN         |
| 1298 | CL   | 5  | CID                             | 14.83 | 1 (K)R R K\ P E D V\L\D\D\D\D\A G\S/A P/L K S/s/G Q H Q N D K(G)                                                                       | S21 =n                      | NP_001719.2 | BSG         |
| 1299 | CL   | 5  | CID                             | 17.63 | 2 (K)R R R P R Y R/K\R L/R S/s S/S/S L/S S/S/G/A/P/s P K G K(Q)                                                                        | S13 =n,S24 =n               | NP_694984.2 | BRWD3       |
| 1300 | AL   | 3  | ETD                             | 9.44  | 1 (K)S/K P P P T Y/E s E E E D K(C)                                                                                                    | S9 =n                       | NP_055114.1 | BRD4        |
| 1301 | EL   | 4  | ETD                             | 13.64 | 1 (K)R K A\D T/T T P T/T S A I T\A s R S E S P P P L/S D P\K(Q)                                                                        | S16 =n,S20 =nf              | NP_031397.1 | BRD3        |
| 1302 | EL   | 5  | ETD                             | 25.84 | 1 (K)V/V/A R R E s G/G\R P I K P P\K\K(D)                                                                                              | S7 =n                       | NP_031397.1 | BRD3        |
| 1303 | CT   | 2  | CID                             | 12.4  | 1 (R)S E s P/P/P/L S D P K(Q)                                                                                                          | S3 =k                       | NP_031397.1 | BRD3        |
| 1304 | ET   | 4  | ETD                             | 19.51 | 1 (R)R/E s G R P I K P P R(K)                                                                                                          | S3 =n                       | AAH63840.1  | BRD2        |
| 1305 | EL   | 4  | ETD                             | 24.45 | 1 (K)G L/A G/G D R\A/S R P/L s\A\R S E P S E\K(G)                                                                                      | S13 =n                      | NP_060644.4 | BPY2IP1     |
| 1306 | CT   | 3  | CID                             | 14.58 | 1 (K)K T T E E/Q V Q A S/t/P/C P R(T)                                                                                                  | T11 =n                      | NP_056016.1 | BOP1        |
| 1307 | CG   | 2  | CID                             | 14.57 | 1 (E)A L D Y F s D/K\E(S)                                                                                                              | S6 =k                       | NP_055554.1 | BCLAF1      |
| 1308 | EG   | 5  | ETD                             | 27.27 | 1 (E)G/L/K/Y/K S K V S L K\G N\ R E s D\G F\R\E\E(K)                                                                                   | S16 =n                      | NP_055554.1 | BCLAF1      |
| 1309 | EG   | 5  | ETD                             | 22.5  | 2 (E)G/L/K Y K S K V\ s L K\G N R E s D\G\F\R\E E(K)                                                                                   | S9 =n,S16 =n                | NP_055554.1 | BCLAF1      |
| 1310 | EG   | 4  | ETD                             | 7.05  | 1 (E)G/L/K Y K S K V/s L K G/N R E S\D G\F R E\E(K)                                                                                    | S9 =n                       | NP_055554.1 | BCLAF1      |
| 1311 | EG   | 5  | ETD                             | 26.85 | 1 (E)K/S/T F R E/E s P/L R/I K m I\A S\D\S\H R P\E(V)                                                                                  | S8 =n                       | NP_055554.1 | BCLAF1      |
| 1312 | AG   | 5  | CID                             | 7.74  | 2 (E)R G D s K\G\S\R E S\S/G s R K/Q E(K)                                                                                              | S4 =n,S13 =n                | NP_055554.1 | BCLAF1      |
| 1313 | AG   | 5  | ETD                             | 6.97  | 3 (E)R I t V K K\E t Q S/P E Q V K s E(K)                                                                                              | T3 =n,T8 =n,S16 =n,S10 =nf  | NP_055554.1 | BCLAF1      |
| 1314 | AG   | 5  | ETD                             | 17.31 | 2 (E)T/Q s\ P E Q V K S E K L K\D L F D Y\ s\ P P L\H K\N L\D\A R\E(K)                                                                 | S3 =k,S19 =k                | NP_055554.1 | BCLAF1      |
| 1315 | AG   | 5  | ETD                             | 11.97 | 2 (E)T Q S P E Q V K S E K L K D\L\F\D y S P P L H\K\N L D\A R\E(K)                                                                    | S9 =n,Y18 =n,S3 =nf,S19 =nf | NP_055554.1 | BCLAF1      |
| 1316 | ELX  | 3  | ETD                             | 16.99 | 1 (K)D/L F D Y s P/P L H\K(N)                                                                                                          | S6 =k                       | NP_055554.1 | BCLAF1      |
| 1317 | ELX  | 3  | ETD                             | 10.39 | 1 (K)D/T/F/E H D P/S E s\I\D E F N\K(S)                                                                                                | S10 =n                      | NP_055554.1 | BCLAF1      |
| 1318 | AT   | 2  | CID                             | 20.42 | 1 (K)F N D/s/E/G/D D T/E/E/T/E D Y R(Q)                                                                                                | S4 =n                       | NP_055554.1 | BCLAF1      |
| 1319 | ELX  | 4  | ETD                             | 15.74 | 1 (K)F/N D s E G/D D T E E T/E D\Y R Q F R\K(S)                                                                                        | S4 =n                       | NP_055554.1 | BCLAF1      |
| 1320 | EL   | 4  | ETD                             | 15.44 | 2 (K)F/N D s E G D D T E E/t/E D Y R\Q\F\R\K(S)                                                                                        | S4 =n,T12 =n                | NP_055554.1 | BCLAF1      |

| #    | Exp. | CS | Number of phosphorylation sites |       | Sequence with fragments                                                                 | Literature lookup            | RefSeq#     | Gene Symbol |
|------|------|----|---------------------------------|-------|-----------------------------------------------------------------------------------------|------------------------------|-------------|-------------|
|      |      |    | Mode                            | Score |                                                                                         |                              |             |             |
| 1321 | ELX  | 4  | ETD                             | 12.77 | 1 (K)F/N D S E G/D D t/E E T E D\Y R\Q F R\K(S)                                         | T9 =n                        | NP_055554.1 | BCLAF1      |
| 1322 | ELX  | 4  | ETD                             | 10.69 | 2 (K)F/N D s E G D D T E E T E D\y R\Q\F\R\K(S)                                         | S4 =n,Y15 =n                 | NP_055554.1 | BCLAF1      |
| 1323 | AT   | 3  | ETD                             | 14.65 | 1 (K)G/N/R E s D G F R E E\K(N)                                                         | S5 =n                        | NP_055554.1 | BCLAF1      |
| 1324 | AT   | 3  | CID                             | 19.16 | 1 (K)K A/E\G\Q\Q E E s/P L\K(S)                                                         | S10 =k                       | NP_055554.1 | BCLAF1      |
| 1325 | ELX  | 3  | ETD                             | 17.08 | 1 (K)K/A E G E P Q/E E\ s P\L\K(S)                                                      | S10 =k                       | NP_055554.1 | BCLAF1      |
| 1326 | ET   | 4  | ETD                             | 24.14 | 1 (K)K/A E G E/P Q E E s P L K\S\K(S)                                                   | S10 =k                       | NP_055554.1 | BCLAF1      |
| 1327 | AT   | 3  | CID                             | 12.87 | 1 (K)K/A E/G E P Q E\E s P L\K S\K(S)                                                   | S10 =k                       | NP_055554.1 | BCLAF1      |
| 1328 | ET   | 3  | ETD                             | 13.33 | 1 (K)L/K D L F D y S P P L H\K(N)                                                       | Y7 =n,S8 =nf                 | NP_055554.1 | BCLAF1      |
| 1329 | ET   | 4  | ETD                             | 24.43 | 1 (K)N/T P S Q H\S H S I Q H s\P E\R(S)                                                 | S13 =n                       | NP_055554.1 | BCLAF1      |
| 1330 | AT   | 4  | ETD                             | 18.45 | 2 (K)N/T P S Q H S H s I Q H s P E\R(S)                                                 | S9 =n,S13 =n                 | NP_055554.1 | BCLAF1      |
| 1331 | CL   | 4  | CID                             | 10.69 | 1 (K)Q K/F N D s E/G D/D/T/E/E/T E D/Y/R Q F R K(S)                                     | S6 =n                        | NP_055554.1 | BCLAF1      |
| 1332 | ELX  | 4  | ETD                             | 9.1   | 1 (K)S/K s/Q E E P K/D T F\ E H D P S E S I D/E F N K(S)                                | S3 =n                        | NP_055554.1 | BCLAF1      |
| 1333 | ELX  | 5  | ETD                             | 24.66 | 2 (K)s P E/I/H R\R I D\I s P S T L R\K(H)                                               | S1 =n,S11 =k                 | NP_055554.1 | BCLAF1      |
| 1334 | CT   | 3  | CID                             | 12.81 | 1 (K)S/T F/R/E E s/P\L R(I)                                                             | S7 =n                        | NP_055554.1 | BCLAF1      |
| 1335 | AT   | 3  | ETD                             | 11.73 | 1 (K)S/T F R E E s/P L\R(I)                                                             | S7 =n                        | NP_055554.1 | BCLAF1      |
| 1336 | EL   | 3  | ETD                             | 16.67 | 1 (K)S/T/F/R/E E/s P\L R\I\K(M)                                                         | S7 =n                        | NP_055554.1 | BCLAF1      |
| 1337 | EL   | 3  | ETD                             | 10.81 | 2 (K)s/T\F R E E s P L\R I\K(M)                                                         | S1 =n,S7 =n                  | NP_055554.1 | BCLAF1      |
| 1338 | ELX  | 3  | ETD                             | 8.7   | 2 (K)S t F R E E s P L R I\K(M)                                                         | T2 =n,S7 =n                  | NP_055554.1 | BCLAF1      |
| 1339 | ELX  | 5  | ETD                             | 23.15 | 1 (K)T I/A P Q N/A P/R D E S R G R S s\F Y/P\D G G\D Q\E T\A\K(T)                       | S17 =n                       | NP_055554.1 | BCLAF1      |
| 1340 | CT   | 3  | CID                             | 12.94 | 2 (R)D E s R/G R s S/F/Y P\D\G/G D Q E T A\K(T)                                         | S3 =n,S7 =n                  | NP_055554.1 | BCLAF1      |
| 1341 | AT   | 2  | CID                             | 12.49 | 1 (R)I/D I s P/S T L R(K)                                                               | S4 =k                        | NP_055554.1 | BCLAF1      |
| 1342 | ET   | 3  | ETD                             | 12.23 | 2 (R)I/D I s P/S t L R\K(H)                                                             | S4 =k,T7 =n                  | NP_055554.1 | BCLAF1      |
| 1343 | ET   | 3  | ETD                             | 15.62 | 2 (R)R/I D I s P S t L R\K(H)                                                           | S5 =k,T8 =n                  | NP_055554.1 | BCLAF1      |
| 1344 | ET   | 4  | ETD                             | 11.42 | 2 (R)S G/S G\S V G N G/S S R Y\S/P s\Q N s P I\H H I P\S\R(R)                           | S16 =n,S19 =k,S14 =nf        | NP_055554.1 | BCLAF1      |
| 1345 | CT   | 3  | CID                             | 11.11 | 2 (R)S G S/G s/V G N G S S R/Y S/P/S Q N S P/I\H H\I P s R(R)                           | S5 =n,S26 =n,S14 =nf,S19 =nf | NP_055554.1 | BCLAF1      |
| 1346 | ET   | 4  | ETD                             | 20.7  | 2 (R)Y/s P S Q N s P I H H I P S\R(R)                                                   | S2 =k,S7 =k                  | NP_055554.1 | BCLAF1      |
| 1347 | AT   | 3  | CID                             | 14.08 | 2 (R)y S P/s\Q N S/P\I H/H/I/P S R(R)                                                   | Y1 =n,S4 =n,S2 =nf,S7 =nf    | NP_055554.1 | BCLAF1      |
| 1348 | AT   | 4  | CID                             | 13.11 | 2 (R)Y s P S Q/N/s/P\I/H/H\I P S R(R)                                                   | S2 =k,S7 =k                  | NP_055554.1 | BCLAF1      |
| 1349 | EG   | 4  | ETD                             | 12.18 | 2 (E)A/m\T Y\R I/G H H S T S/D D S S/A\y\ R s V\D\E(V)                                  | Y18 =n,S20 =k,S10 =nf        | NP_000700.1 | BCKDHA      |
| 1350 | CL   | 4  | CID                             | 13.53 | 1 (K)R R A V E s G V P Q P P D P P V\Q R D E E/E E K(E)                                 | S6 =n                        | NP_057651.1 | BCCIP       |
| 1351 | ELX  | 5  | ETD                             | 11.29 | 1 (K)E/R E/S A E Q/S S G P G P S L R P Q N s T\T W R D G G G/R G P D\E L E G P D S\K(L) | S20 =n                       | NP_004629.2 | BAT2        |
| 1352 | ET   | 4  | ETD                             | 23.62 | 2 (K)L/K F s D E E D G R D s D E E G A E G H\R(D)                                       | S4 =n,S12 =n                 | NP_004629.2 | BAT2        |
| 1353 | ELX  | 5  | ETD                             | 17.84 | 2 (K)L/K F s D E E D/G R D s D E E G\A E G H/R D\S Q S A S\G\ E E R P P\E\A D G\K(K)    | S4 =n,S12 =n                 | NP_004629.2 | BAT2        |
| 1354 | CT   | 3  | CID                             | 21.34 | 1 (K)S/S D/A/S/T/A/Q P/P E/S/Q P L/P A/s\Q T/P A S N Q P K(R)                           | S18 =n                       | NP_004629.2 | BAT2        |



| #    | Exp. | CS | Number of phosphorylation sites |       | Sequence with fragments                                                                                                                        | Literature lookup     | RefSeq#        | Gene Symbol |
|------|------|----|---------------------------------|-------|------------------------------------------------------------------------------------------------------------------------------------------------|-----------------------|----------------|-------------|
|      |      |    | Mode                            | Score |                                                                                                                                                |                       |                |             |
| 1355 | AT   | 3  | ETD                             | 16.85 | 2 (R)E/R S D s\G/G s S S E P F D\R(H)                                                                                                          | S5 =n,S8 =n           | NP_004629.2    | BAT2        |
| 1356 | AT   | 3  | CID                             | 12.26 | 2 (R)E R S D\s/G G/s S/S E P/F D R(H)                                                                                                          | S5 =n,S8 =n           | NP_004629.2    | BAT2        |
| 1357 | AT   | 3  | CID                             | 14.69 | 1 (R)L K/A E/P A\A P P A A P S t/P/A P P P A V\ P K(E)                                                                                         | T14 =n                | NP_004629.2    | BAT2        |
| 1358 | ET   | 3  | ETD                             | 15.82 | 1 (R)R/K Q s S\S E I S L A\ V\E\R(A)                                                                                                           | S4 =n                 | NP_004629.2    | BAT2        |
| 1359 | AG   | 3  | CID                             | 21.52 | 1 (E)A A/A/A A P/Q/R S Q s/P L R\G\m P E(T)                                                                                                    | S11 =n                | NP_004272.2    | BAG3        |
| 1360 | EG   | 3  | ETD                             | 13.16 | 1 (E)A/A/A/A/A P Q R S Q s P\L R G m P\E(T)                                                                                                    | S11 =n                | NP_004272.2    | BAG3        |
| 1361 | ELX  | 4  | ETD                             | 11.58 | 1 (K)T/H Y P A Q Q G E y/Q T H Q P V\Y\H\K(I)                                                                                                  | Y10 =k                | NP_004272.2    | BAG3        |
| 1362 | ET   | 3  | ETD                             | 8.96  | 2 (R)S/S/t P L H s P S P\I\R(V)                                                                                                                | T3 =n,S7 =n           | NP_004272.2    | BAG3        |
| 1363 | EG   | 4  | ETD                             | 17.6  | 2 (E)K H S A V Q R Q G\s\G\R\E s P\s\L A\S R\E(G)                                                                                              | S10 =n,S14 =n         | NP_009176.2    | ATXN2L      |
| 1364 | AT   | 3  | CID                             | 22.26 | 1 (K)E K E V D G L L T S E P/m/G s/P V/S S K(T)                                                                                                | S15 =k                | NP_009176.2    | ATXN2L      |
| 1365 | CT   | 3  | CID                             | 20.97 | 1 (K)G P P Q/s/P V F E G V Y N/N\S R(M)                                                                                                        | S5 =k                 | NP_009176.2    | ATXN2L      |
| 1366 | ELX  | 5  | ETD                             | 30.44 | 1 (K)H/S A V Q R Q\G S/G R E s\P/S L/A S\R E\G\K(Y)                                                                                            | S13 =n                | NP_009176.2    | ATXN2L      |
| 1367 | ELX  | 5  | ETD                             | 29.93 | 1 (K)H/S A V Q R Q\G S/G R E S P s L/A\S R E\G\K(Y)                                                                                            | S15 =n                | NP_009176.2    | ATXN2L      |
| 1368 | ELX  | 4  | ETD                             | 29.17 | 2 (K)H/S A V Q R Q G s G R\E S P s\L/A\S R E\G\K(Y)                                                                                            | S9 =n,S15 =n          | NP_009176.2    | ATXN2L      |
| 1369 | ELX  | 4  | ETD                             | 21    | 2 (K)H/S A V Q R Q G\s G R\E s/P S L A S R E\G\K(Y)                                                                                            | S9 =n,S13 =n          | NP_009176.2    | ATXN2L      |
| 1370 | ELX  | 5  | ETD                             | 17.05 | 1 (K)H/S A V Q R\Q\G s/G R E S P/S\L/A\S R E G K(Y)                                                                                            | S9 =n                 | NP_009176.2    | ATXN2L      |
| 1371 | CT   | 3  | CID                             | 19.72 | 2 (K)L Q P/S S s P/E/N s L D P/F P P R(I)                                                                                                      | S6 =k,S10 =n          | NP_009176.2    | ATXN2L      |
| 1372 | CT   | 3  | CID                             | 10.77 | 2 (K)L Q/P/s s S/P E N\S L D P F P P R(I)                                                                                                      | S4 =n,S5 =n,S6 =nf    | NP_009176.2    | ATXN2L      |
| 1373 | ELX  | 3  | ETD                             | 12.75 | 1 (K)E/N/I K P N E\t S P S F\S\K(A)                                                                                                            | T8 =n                 | NP_002964.2    | ATXN2       |
| 1374 | ELX  | 3  | ETD                             | 11.71 | 1 (K)E/N/I K P N E\t s P S F S\K(A)                                                                                                            | S9 =n                 | NP_002964.2    | ATXN2       |
| 1375 | ELX  | 5  | ETD                             | 8.6   | 2 (K)s R D L\I K D K/I E/P/s/A K(D)                                                                                                            | S1 =n,S12 =n          | NP_002964.2    | ATXN2       |
| 1376 | EL   | 3  | ETD                             | 11.34 | 2 (K)s/K S s/G S S R S K(R)                                                                                                                    | S1 =n,S4 =n           | NP_000480.2    | ATRX        |
| 1377 | AT   | 5  | ETD                             | 10.96 | 1 (K)m Q\D\G N/V D/A S Q/s/K/A K(Q)                                                                                                            | S11 =n                | NP_001001331.1 | ATP2B2      |
| 1378 | CL   | 3  | CID                             | 14.71 | 1 (K)K A s/S E G G T A A/G/A/G L D/S L H\K(N)                                                                                                  | S3 =n                 | NP_005711.1    | ARPC1B      |
| 1379 | ELX  | 3  | ETD                             | 12.47 | 1 (K)S/S/s P E L V T H L\K(W)                                                                                                                  | S3 =n                 | NP_004299.1    | ARHGAP1     |
| 1380 | ELX  | 4  | ETD                             | 26.48 | 1 (K)A/S/E\L G/H s L N E N V L K P A\Q E\K(V)                                                                                                  | S7 =n                 | NP_060679.1    | ARFGAP1     |
| 1381 | EL   | 3  | ETD                             | 17.45 | 1 (K)L/S/L E G D/H S T P P S A Y G S V\K(A)                                                                                                    | Y14 =k,S8 =nf,S16 =nf | NP_001002857.1 | ANXA2       |
| 1382 | CL   | 4  | CID                             | 19.1  | 1 (K)E E I/Q D E\E\D\D\D/D/y V E E G/E/E/E E/E E E G G L R G E K(R)                                                                            | Y12 =n                | NP_112182.1    | ANP32E      |
| 1383 | CG   | 4  | CID                             | 15.99 | 1 (E)N V/F K L L\ P Q\ L/T/Y/L D/G Y D\R D D K\E A P D\s D A\E(G)                                                                              | S25 =n                | NP_006296.1    | ANP32A      |
| 1384 | CL   | 3  | CID                             | 13.69 | 1 (K)I H G S G H V E\E P/A s P L/A A Y Q K(S)<br>(E)G G R\S D S L R S F/S S/D/R S\H T/L s\H A\S Y L R D S A V/M/D D S V                        | S12 =n                | NP_001140.2    | ANK3        |
| 1385 | AG   | 5  | ETD                             | 7.72  | 1 V I/P/S H Q V S T/L\A/K/E/A E(R)                                                                                                             | S19 =n                | NP_001139.3    | ANK2        |
| 1386 | AG   | 5  | ETD                             | 8.36  | 2 (E)V s E/M K Q/D L I K M/T A I\L T t/D/V S D K\A\G/S I\K V K E(L)<br>(E)V s E m K Q\ D L I K M T A I/L T/t D\V\S\D K A/G\S I/K V K E L V K A | S2 =n,T17 =n          | NP_001139.3    | ANK2        |
| 1387 | AG   | 5  | CID                             | 9.19  | 2 A E(E)                                                                                                                                       | S2 =n,T17 =n          | NP_001139.3    | ANK2        |
| 1388 | EL   | 3  | ETD                             | 16.87 | 1 (K)T D/G P V F H S\N t L E R\K(T)                                                                                                            | T10 =n                | NP_573572.1    | AMOT        |

| #    | Exp. | CS | Number of phosphorylation sites |       | Sequence with fragments | Literature lookup                                                   | RefSeq#              | Gene        |        |
|------|------|----|---------------------------------|-------|-------------------------|---------------------------------------------------------------------|----------------------|-------------|--------|
|      |      |    | Mode                            | Score |                         |                                                                     |                      | ▼           | Symbol |
| 1389 | EG   | 5  | ETD                             | 11.13 | 2                       | (E)G/T/L/L K/P/N M V t/P/G/H A C t Q K F S H\E(E)                   | T10 =n,T16 =n        | NP_000025.1 | ALDOA  |
| 1390 | CL   | 3  | CID                             | 15.25 | 1                       | (K)Y T/P/S G Q A G A A/A/S E s L/F V S\N H\A\Y(-)                   | S14 =n               | NP_000025.1 | ALDOA  |
| 1391 | CT   | 3  | CID                             | 14.05 | 1                       | (K)Y T P/S G Q A\G A\A/A s E S L/F V S N H A\Y(-)                   | S12 =n               | NP_000025.1 | ALDOA  |
| 1392 | EL   | 3  | ETD                             | 5.58  | 1                       | (K)Y T P S G Q A G A A A S/E/s L F V S N\H\A\Y(-)                   | S14 =n               | NP_000025.1 | ALDOA  |
| 1393 | AT   | 4  | CID                             | 22.78 | 2                       | (R)A A/T/A/A/R/P/P A\P/P/P/A P/Q/P/P s/P T/P/s/P P R P T L A R(E)   | S18 =n,S22 =n        | NP_115751.1 | AKT151 |
| 1394 | ELX  | 5  | ETD                             | 12.41 | 1                       | (K)R E\Q S/H/A E I s P P A/E/S G Q\A\V\E E\C\K\E E G E\E\K(Q)       | S9 =n                | NP_005091.2 | AKAP12 |
| 1395 | ELX  | 4  | ETD                             | 26.23 | 2                       | (K)R/V R\R P s E s D K E D E L D\K(V)                               | S6 =n,S8 =n          | NP_005091.2 | AKAP12 |
| 1396 | EL   | 4  | ETD                             | 21.08 | 1                       | (K)R/V R R P s E S D K E D E L D\K(V)                               | S6 =n                | NP_005091.2 | AKAP12 |
| 1397 | ET   | 2  | ETD                             | 8.15  | 2                       | (K)S/A/E/s P T/s P V T S\T S\T\G\A\T F\K(K)                         | S4 =n,S7 =n          | NP_005091.2 | AKAP12 |
| 1398 | EL   | 4  | ETD                             | 13.99 | 1                       | (K)S P P/s P V E R E m\V\Q\Q V\E R E\K(T)                           | S4 =n                | NP_005091.2 | AKAP12 |
| 1399 | ET   | 4  | ETD                             | 10.55 | 2                       | (R)V R R P s E\ s D K E D E L D\K V\K(S)                            | S5 =n,S7 =n          | NP_653080.1 | AKAP12 |
| 1400 | EL   | 3  | ETD                             | 20.47 | 1                       | (K)S/R S P G s P V G E G T G S P P\K(W)                             | S6 =k                | NP_001110.2 | ADD1   |
| 1401 | CL   | 3  | CID                             | 19.09 | 1                       | (K)S R s\P\G S P V G E G T G\A P P K(W)                             | S3 =n,S6 =nf         | NP_001110.2 | ADD1   |
| 1402 | CL   | 3  | CID                             | 17.83 | 1                       | (K)s/R S\P\G S P V G E G T/G\A P P K(W)                             | S1 =n,S6 =nf         | NP_001110.2 | ADD1   |
| 1403 | CL   | 4  | CID                             | 17.98 | 1                       | (K)T R W L\N S G/R G\D\E A\S\E\E\G\Q\N G\S s P K(S)                 | S21 =k,T1 =nf        | NP_001110.2 | ADD1   |
| 1404 | EL   | 4  | ETD                             | 11.13 | 1                       | (K)T/R\W\L N S G/R G D E\A S E E G Q N G\S\ s P\K(S)                | S21 =k,T1 =nf        | NP_001110.2 | ADD1   |
| 1405 | EG   | 3  | ETD                             | 13.77 | 1                       | (E)A S/s/P P P/H/P Q\L H\S\E\E\E(I)                                 | S3 =n                | NP_055792.1 | ACIN1  |
| 1406 | EG   | 4  | ETD                             | 6.62  | 3                       | (E)I/K S/S Q\G L K E K s/K s P/s P P\R L\T\E(D)                     | S11 =k,S13 =k,S15 =k | NP_055792.1 | ACIN1  |
| 1407 | EG   | 3  | ETD                             | 13.08 | 2                       | (E)K/S K s P s/P P R\L T\E(D)                                       | S4 =k,S6 =k,S2 =nf   | NP_055792.1 | ACIN1  |
| 1408 | EL   | 5  | ETD                             | 26.06 | 1                       | (K)E/G/R R A s H T L\L/P\S H R\L\K(Q)                               | S6 =n                | NP_055792.1 | ACIN1  |
| 1409 | ELX  | 4  | ETD                             | 32.6  | 1                       | (K)E/R T S T S S S/S V Q A R R L s Q P E S A\E\K(H)                 | S16 =k               | NP_055792.1 | ACIN1  |
| 1410 | ELX  | 5  | ETD                             | 8.22  | 3                       | (K)E/s s L P/K S/F K\R K I S/V/V/S/A/t\K(G)                         | S2 =n,S3 =n,T18 =n   | NP_055792.1 | ACIN1  |
| 1411 | EL   | 5  | ETD                             | 20.76 | 2                       | (K)G/E/R R s s R\ V R Q A R\A A\K(L)                                | S5 =n,S6 =n          | NP_055792.1 | ACIN1  |
| 1412 | ELX  | 3  | ETD                             | 16.61 | 1                       | (K)G/V P/A/G N s D\T E G/G\Q P G R\K(R)                             | S7 =n                | NP_055792.1 | ACIN1  |
| 1413 | ELX  | 4  | ETD                             | 22.95 | 1                       | (K)H/V/T Q R\L Q P E R G s P\K(K)                                   | S12 =n               | NP_055792.1 | ACIN1  |
| 1414 | ELX  | 4  | ETD                             | 27.15 | 2                       | (K)K V T L G D t L/T/R\R s I S Q Q\K(S)                             | T7 =n,S12 =n         | NP_055792.1 | ACIN1  |
| 1415 | ELX  | 4  | ETD                             | 15.02 | 2                       | (K)K V/T L G D T L T R\R s I\ s Q\Q\K(S)                            | S12 =n,S14 =n        | NP_055792.1 | ACIN1  |
| 1416 | ELX  | 4  | ETD                             | 7.69  | 2                       | (K)K V T/L G/D\T\L t R R\ s I S\Q\Q\K(S)                            | T9 =n,S12 =n         | NP_055792.1 | ACIN1  |
| 1417 | ELX  | 4  | ETD                             | 7.49  | 2                       | (K)K V/T\L G D t L\T/R\R\ S I s\Q\Q\K(S)                            | T7 =n,S14 =n         | NP_055792.1 | ACIN1  |
| 1418 | ELX  | 5  | ETD                             | 14.26 | 1                       | (K)L/S E/G S/Q P A E/E E E D\Q E t P S R/N L R V R\A\D R N\L\K(T)   | T16 =n,S2 =nf,S5 =nf | NP_055792.1 | ACIN1  |
| 1419 | ELX  | 5  | ETD                             | 12.37 | 1                       | (K)L/S E G S Q P\A E\E E E D Q E T\ P\ s R/N L R V R\A\D R N\L\K(T) | S18 =n,S2 =nf,S5 =nf | NP_055792.1 | ACIN1  |
| 1420 | ELX  | 4  | ETD                             | 22.08 | 2                       | (K)S K/s P s P\ P R L T E D R\K(K)                                  | S3 =k,S5 =k,S1 =nf   | NP_055792.1 | ACIN1  |
| 1421 | ELX  | 4  | ETD                             | 11.26 | 2                       | (K)S/K s/P\ s P\ P R L/T E D R K\K(A)                               | S3 =k,S5 =k,S1 =nf   | NP_055792.1 | ACIN1  |
| 1422 | AT   | 4  | CID                             | 19.96 | 1                       | (K)S/S S/I/S E E K/G D s D/D/E K P R(K)                             | S11 =n               | NP_055792.1 | ACIN1  |
| 1423 | AT   | 4  | ETD                             | 16.55 | 1                       | (K)S/S/S/I S/E E K G D s D D/E K P\R(K)                             | S11 =n               | NP_055792.1 | ACIN1  |

| #    | Exp. | CS | Number of phosphorylation sites |       | Sequence with fragments                                                 | Literature lookup         | RefSeq#        | Gene Symbol |
|------|------|----|---------------------------------|-------|-------------------------------------------------------------------------|---------------------------|----------------|-------------|
|      |      |    | Mode                            | Score |                                                                         |                           |                |             |
| 1424 | EL   | 5  | ETD                             | 19.04 | 3 (K)V/R E G/P R s R s R s R D\R\R K\K(E)                               | S7 =n,S9 =n,S11 =n        | NP_055792.1    | ACIN1       |
| 1425 | ET   | 4  | ETD                             | 25.61 | 2 (R)K/S/S s I S E E K G D s D D E K P\R(K)                             | S4 =n,S12 =n              | NP_055792.1    | ACIN1       |
| 1426 | ET   | 4  | ETD                             | 12.1  | 2 (R)s/R s R S R D R R R\K E\R(A)                                       | S1 =n,S3 =n               | NP_055792.1    | ACIN1       |
| 1427 | ET   | 4  | ETD                             | 8.88  | 1 (K)N L/L/V\t/m L I D/Q L C G\R(D)                                     | T5 =n                     | NP_942131.1    | ACACA       |
| 1428 | ET   | 5  | ETD                             | 12.94 | 2 (R)G G/S W V V/I\ D S/s/I N\ P R/H\m E m/y A\D R\E\S\R(G)             | S10 =n,Y19 =n             | NP_942131.1    | ACACA       |
| 1429 | EL   | 3  | ETD                             | 15    | 1 (K)N/Y I A R F\G H G s A\K(L)                                         | S10 =n                    | NP_005683.2    | ABCF2       |
| 1430 | CL   | 3  | CID                             | 14.95 | 1 (K)G/G N V/F/A/A/L I Q/D Q s E\E/E E E E\E\K(H)                       | S13 =n                    | NP_001020262.1 | ABCF1       |
| 1431 | CL   | 3  | CID                             | 24.42 | 1 (K)K/A E Q G s E E E G E G E/E E/E E E G\G\E\S\K(A)                   | S6 =n                     | NP_001020262.1 | ABCF1       |
| 1432 | ET   | 3  | ETD                             | 18.04 | 1 (R)E/D s Q R P G A/H/L T V K(K)                                       | S3 =n                     | NP_001011724.1 | HNRPA1      |
| 1433 | CT   | 4  | CID                             | 14.57 | 2 (R)M L F y T M/K P S E/T S\F/Q\t\L\E E \V\ P D Y V K K(A)             | Y4 =n,T15 =n              | NP_001004320.1 | 392636      |
| 1434 | AL   | 4  | CID                             | 16.29 | 2 (K)T D L s I\Q T R N A E E K I m N T W y P\K(V)                       | S4 =n,Y19 =n              | NP_940966.1    | 375347      |
| 1435 | ELX  | 5  | ETD                             | 10.56 | 3 (K)S R\S\H/G R\H\S\D s I\A/R s/P C K s P\K(G)                         | S10 =n,S14 =n,S18 =n      | NP_542781.2    | 135295      |
| 1436 | EG   | 5  | ETD                             | 15.85 | 1 (E)K/G/K P K P R\s P Q P P S R Q A E P P K K\E(A)                     | S8 =k                     | NP_653205.2    | 124245      |
| 1437 | EG   | 5  | ETD                             | 27.32 | 1 (E)D/S/K L K\G G K A P R\V A/T s S K\V\T\R A Q I\E(D)                 | S15 =n                    | NP_612451.1    | 115098      |
| 1438 | ET   | 3  | ETD                             | 11.79 | 1 (R)A/Q I E D t L R\R(D)                                               | T6 =n                     | NP_612451.1    | 115098      |
| 1439 | EL   | 4  | ETD                             | 10.19 | 2 (K)K/R P Q/R A t s N V/F\A M/F\ D Q S Q I Q E F\K(E)                  | T7 =n,S8 =n               | NP_291024.1    | 103910      |
| 1440 | EL   | 4  | ETD                             | 9.59  | 2 (K)K/R P Q R A t s N\ V F A m F D Q S\Q I Q E F\K(E)                  | T7 =n,S8 =n               | NP_291024.1    | 103910      |
| 1441 | ELX  | 5  | ETD                             | 13.07 | 3 (K)E/R/R/R E R A D/R G/E A/E R G s G G s\s G\D E/L R\E D D E P V\K(K) | S16 =n,S19 =n,S20 =n      | NP_001001520.1 | 84717       |
| 1442 | ET   | 4  | ETD                             | 23.43 | 1 (K)G E/S/A E D K\E H E E G\R D s\E E G\P\R(C)                         | S15 =n                    | NP_001001520.1 | 84717       |
| 1443 | ELX  | 4  | ETD                             | 11.94 | 4 (K)G R/G R G P P/s\s\s\D s E P E A E L E R E A\K(K)                   | S8 =n,S9 =n,S10 =n,S12 =n | NP_001001520.1 | 84717       |
| 1444 | ET   | 4  | ETD                             | 12.72 | 4 (K)K A P/S A s\D s D s K A D s D G A\K P E P\V A m\A\R(S)             | S6 =n,S8 =n,S10 =n,S14 =n | NP_001001520.1 | 84717       |
| 1445 | EL   | 5  | ETD                             | 21.74 | 1 (K)V/E R T R\K R s E G F S m D R\K(V)                                 | S8 =n                     | NP_001001520.1 | 84717       |
| 1446 | EL   | 5  | ETD                             | 18.39 | 2 (K)V/E/R T R\K R s E G F/s m D R\K(V)                                 | S8 =n,S12 =n              | NP_001001520.1 | 84717       |
| 1447 | ET   | 4  | ETD                             | 19.82 | 3 (R)A/D/R G E A E R G s G G s\s G D E L R E D D E P V\K(K)             | S10 =n,S13 =n,S14 =n      | NP_001001520.1 | 84717       |
| 1448 | ET   | 5  | ETD                             | 21.98 | 3 (R)A/D/R G E A E R G s\G\G/s s/G\D\E/L R E D D E P V\K\K(R)           | S10 =n,S13 =n,S14 =n      | NP_001001520.1 | 84717       |
| 1449 | AT   | 2  | CID                             | 15.36 | 1 (R)A R G D\s E A L D\E\E\S(-)                                         | S5 =n                     | NP_001001520.1 | 84717       |
| 1450 | ET   | 4  | ETD                             | 23.99 | 3 (R)G E/A E R/G s G/G s s G/D/E L R E D D E P V\K(K)                   | S7 =n,S10 =n,S11 =n       | NP_001001520.1 | 84717       |
| 1451 | ET   | 4  | ETD                             | 12.79 | 3 (R)G E A\E R G s G G/s s G D E L R E D D E P V\K\K(R)                 | S7 =n,S10 =n,S11 =n       | NP_001001520.1 | 84717       |
| 1452 | ET   | 3  | ETD                             | 18.17 | 1 (R)K R/s E/G/F/S M D R(K)                                             | S3 =n                     | NP_001001520.1 | 84717       |
| 1453 | ELX  | 5  | ETD                             | 12.85 | 2 (K)K R G R Y\R Q Y N S E I L E E A I/s/V V\m/s G K/M S/V S K(A)       | S18 =n,S22 =n             | NP_115816.1    | 84458       |
| 1454 | CT   | 3  | CID                             | 21.99 | 1 (K)G E/A V/L/R P/G\L\D\A E P E L s P E E Q R(V)                       | S16 =n                    | NP_115726.1    | 84310       |
| 1455 | ET   | 3  | ETD                             | 11.42 | 1 (R)D/S S/D s A D/G R A T P\S\E N L V P S S A\R(V)                     | S5 =n                     | NP_079087.2    | 79869       |
| 1456 | AG   | 4  | ETD                             | 25.84 | 1 (E)S K/T A N K R S A/s T E K L\E(Q)                                   | S10 =n                    | AAH40518.1     | 79649       |
| 1457 | ELX  | 4  | ETD                             | 30.49 | 2 (K)E/R/S S s L/N R R\D s N L H\S S T D\K(E)                           | S5 =n,S11 =n              | AAH40518.1     | 79649       |
| 1458 | ET   | 4  | ETD                             | 18.62 | 1 (R)R D s N L H S/S T D K E Q A E\R(K)                                 | S3 =n                     | AAH40518.1     | 79649       |

| #    | Exp. | CS | Number of phosphorylation sites |       |   | Sequence with fragments                                                                                       | Literature lookup   | RefSeq#     | Gene Symbol |
|------|------|----|---------------------------------|-------|---|---------------------------------------------------------------------------------------------------------------|---------------------|-------------|-------------|
|      |      |    | Mode                            | Score | ▼ |                                                                                                               |                     |             |             |
| 1459 | EL   | 5  | ETD                             | 10.12 | 1 | (K)M D I N R R R Y/P\A H/L\A\R\S S S\R\K(Y)                                                                   | S17 =n              | NP_077001.1 | 79077       |
| 1460 | CT   | 3  | CID                             | 13.63 | 3 | (R)K S/P S G P V/K\S/P/P/L\S P/V/G t T P\V\K(L)                                                               | S9 =n,S13 =n,T17 =n | NP_076998.1 | 79074       |
| 1461 | ELX  | 3  | ETD                             | 7.39  | 1 | (K)K Q\K\t E D E/V L T\S K(G)                                                                                 | T4 =n               | NP_076943.1 | 79002       |
| 1462 | CT   | 3  | CID                             | 15.38 | 1 | (R)A F/V E D s E/D/E\D\G A G/E/G/G/S/S/L/L Q\K(R)                                                             | S6 =n               | NP_075384.2 | 65095       |
| 1463 | ET   | 3  | ETD                             | 10.34 | 1 | (R)A F V E/D/s E D\E D G/A G E\G G S S L L Q\K(R)                                                             | S6 =n               | NP_075384.2 | 65095       |
| 1464 | EL   | 4  | ETD                             | 19.02 | 1 | (K)m/E/A/V P/D V E R K E D K P\E G\Q\s P\V\K(A)                                                               | S18 =n              | NP_071349.2 | 63893       |
| 1465 | AL   | 3  | CID                             | 9.37  | 2 | (K)V/R S/G G\G s G G\S\G/G/Q V s L K(K)                                                                       | S7 =n,S15 =n        | NP_067051.1 | 58506       |
| 1466 | ELX  | 3  | ETD                             | 7.01  | 1 | (K)F/G F A I/G s\Q T T K\K(A)                                                                                 | S7 =n               | NP_065090.1 | 57092       |
| 1467 | ELX  | 3  | ETD                             | 22.42 | 1 | (K)N/I G/R D T/P T s A G P N S F N\K(G)                                                                       | S9 =n               | NP_065090.1 | 57092       |
| 1468 | ELX  | 3  | ETD                             | 18.92 | 2 | (K)N/I G R D\t P\T/s A G P N S F N\K(G)                                                                       | T6 =n,S9 =n         | NP_065090.1 | 57092       |
| 1469 | ELX  | 3  | ETD                             | 12.13 | 3 | (K)N/I G/R/D t P T\T s A G P N S F N\K(G)                                                                     | T6 =n,S9 =n,S14 =n  | NP_065090.1 | 57092       |
| 1470 | ELX  | 3  | ETD                             | 19.53 | 1 | (K)R S A\E E E A A D L P\T K P t\K(I)                                                                         | T15 =n              | NP_065090.1 | 57092       |
| 1471 | ELX  | 4  | ETD                             | 12.45 | 1 | (K)R/S/A/E E E A A\D L P T K P/T\K I s\K(F)                                                                   | S18 =n              | NP_065090.1 | 57092       |
| 1472 | AL   | 2  | CID                             | 15.72 | 2 | (K)A/A/V L s D s E/D E E K(A)                                                                                 | S5 =k,S7 =k         | NP_060439.1 | 55677       |
| 1473 | CL   | 2  | CID                             | 13.46 | 2 | (K)T I A s D s E/E/E/A G K(E)                                                                                 | S4 =k,S6 =k         | NP_060439.1 | 55677       |
| 1474 | ET   | 3  | ETD                             | 14.65 | 2 | (K)T/I A s D s E/E E A G K E L S D\K(K)                                                                       | S4 =k,S6 =k         | NP_060439.1 | 55677       |
| 1475 | ET   | 3  | ETD                             | 11.7  | 2 | (R)K A/A/V L s D/s E/D\E E K A S A\K(K)                                                                       | S6 =k,S8 =k         | NP_060439.1 | 55677       |
| 1476 | ELX  | 4  | ETD                             | 30.97 | 1 | (K)Q/R K D s\A S E E E A R V G A\G\K(R)                                                                       | S5 =k               | NP_060286.1 | 55646       |
| 1477 | EL   | 4  | ETD                             | 24.88 | 2 | (K)Q/R K D\s A s E E E A R V G A G\K(R)                                                                       | S5 =k,S7 =n         | NP_060286.1 | 55646       |
| 1478 | EL   | 3  | ETD                             | 11.77 | 1 | (K)R/R H/s E/V E T D\S\K(K)                                                                                   | S4 =n               | NP_060286.1 | 55646       |
| 1479 | AT   | 4  | CID                             | 15.59 | 2 | (R)t N T t A V G I/S K P A N/I H V K\S P/C S V/V G N S N S Q N K(I)                                           | T1 =n,T4 =n         | NP_060639.2 | 55196       |
| 1480 | EL   | 4  | ETD                             | 15.32 | 1 | (K)L/I/G V P/A D/A/E A/L S\E R S\G N T/P/N/s P R L A A E\S\K(L)                                               | S21 =n              | NP_060255.2 | 54908       |
| 1481 | EL   | 3  | ETD                             | 9.88  | 1 | (K)s R/R N L D F/Q D V\L\D\K(L)                                                                               | S1 =n               | NP_055121.1 | 51493       |
| 1482 | CT   | 3  | CID                             | 11.76 | 1 | (K)S E V/Q Q P V H P K/P L s/P D S R(A)                                                                       | S13 =n              | NP_057441.1 | 51474       |
| 1483 | ET   | 3  | ETD                             | 12.64 | 1 | (R)E/T P H\s P/G V E D\A P\I\A\K(V)<br>(E)R A K K Y G G S V G S Q P P P V A P/E P/G P V P/s\S/P S Q E/P P T K | S5 =k               | NP_057441.1 | 51474       |
| 1484 | CG   | 5  | CID                             | 26.22 | 1 | R E(Y)                                                                                                        | S25 =n              | NP_056937.2 | 51035       |
| 1485 | AT   | 4  | CID                             | 19.53 | 1 | (K)K Y G G S V G S/Q\P P P V A P/E/P G P\V P s S P S Q E P P T K(R)                                           | S22 =n              | NP_056937.2 | 51035       |
| 1486 | AT   | 4  | CID                             | 23.7  | 1 | (K)K Y G G S V G S Q P/P/P V A P/E/P G/P/V/P/s S/P S Q E/P P T K R(E)                                         | S22 =n              | NP_056937.2 | 51035       |
| 1487 | AT   | 4  | CID                             | 12.67 | 2 | (K)K y G G S V G S/Q P/P/P V A P E P/G/P V\p s S/P S Q E P P T K R(E)                                         | Y2 =n,S22 =n        | NP_056937.2 | 51035       |
| 1488 | CL   | 3  | CID                             | 20.04 | 1 | (K)Y/G G S V/G S Q P/P/P V A P E P G P V P s S/P S Q/E P P T K(R)                                             | S21 =n              | NP_056937.2 | 51035       |
| 1489 | AT   | 3  | CID                             | 23.73 | 1 | (K)Y G G S V G S Q P/P P V A P E P/G P V P S s P S Q E/P P T K R(E)                                           | S22 =n              | NP_056937.2 | 51035       |
| 1490 | ET   | 4  | ETD                             | 12.85 | 1 | (K)Y G G S/V/G S Q P P P V A P E P G P V P S S\p S Q\E P P t K\R(E)                                           | T29 =n              | NP_056937.2 | 51035       |
| 1491 | EL   | 4  | ETD                             | 20.74 | 1 | (K)N/S/E P S A R H/V D S L S\Q R\s P\K(A)                                                                     | S16 =n              | AAF23374.1  | SEPT9       |
| 1492 | EL   | 5  | ETD                             | 15.72 | 2 | (K)N S E P S A R H/V D S/L/s Q R\S P K A\s\L/R/R V\E\L/S G P K(A)                                             | S13 =n,S20 =n       | AAF23374.1  | SEPT9       |

| #    | Exp. | CS | Number of phosphorylation sites |       | Sequence with fragments | Literature lookup                                                                     | RefSeq#                | Gene           |        |
|------|------|----|---------------------------------|-------|-------------------------|---------------------------------------------------------------------------------------|------------------------|----------------|--------|
|      |      |    | Mode                            | Score |                         |                                                                                       |                        | ▼              | Symbol |
| 1493 | ET   | 4  | ETD                             | 12.39 | 1                       | (K)R A E V/L G H\K t/P\E P A P\R(R)                                                   | T9 =n                  | AAF23374.1     | SEPT9  |
| 1494 | AL   | 4  | ETD                             | 20.72 | 1                       | (K)A/N/W E\A Q Q R I L E Q\Q\N/S S\R\t L/E\K(N)                                       | T18 =n                 | NP_001011553.1 | SEPT7  |
| 1495 | AL   | 4  | CID                             | 14.23 | 1                       | (K)A N W/E/A/Q/Q R/I L E/Q Q N s\S R\T L E K(N)                                       | S15 =n                 | NP_001011553.1 | SEPT7  |
| 1496 | ET   | 3  | ETD                             | 19.42 | 1                       | (R)I/L/E Q Q N S\S R t L E\K(N)                                                       | T10 =n                 | NP_001011553.1 | SEPT7  |
| 1497 | CL   | 3  | CID                             | 22.67 | 1                       | (K)T A/A/E/L L\Q S/Q G S Q/A G/G/S/Q t L\K(R)                                         | T18 =n                 | NP_055944.2    | SEPT6  |
| 1498 | EL   | 3  | ETD                             | 21.36 | 1                       | (K)T A A E/L L Q S Q G/S Q A/G G S Q t L\K(R)                                         | T18 =n                 | NP_055944.2    | SEPT6  |
| 1499 | EL   | 3  | ETD                             | 24.23 | 1                       | (K)I/Y/H L P\D A E s D E D E D F\K(E)                                                 | S9 =k                  | NP_001008491.1 | SEPT2  |
| 1500 | CL   | 2  | CID                             | 18.85 | 1                       | (K)I Y/H L P D A\E\s D E D E D/F K(E)                                                 | S9 =k                  | NP_001008491.1 | SEPT2  |
| 1501 | ET   | 4  | ETD                             | 27.7  | 1                       | (K)I/Y H L P D A/E s D/E D E D F K E Q\T\R(L)                                         | S9 =k                  | NP_001008491.1 | SEPT2  |
| 1502 | AT   | 4  | CID                             | 19.74 | 1                       | (K)I Y/H L P/D A\E\s D/E/D E/D F K/E/Q T R(L)                                         | S9 =k                  | NP_001008491.1 | SEPT2  |
| 1503 | CT   | 4  | CID                             | 15.56 | 1                       | (R)M K R E E\G A\G A T E P E Y/y H Y\I/P P A H C K(V)                                 | Y15 =n                 | NP_001002909.1 | 23131  |
| 1504 | EL   | 4  | ETD                             | 7.47  | 1                       | (K)G V P H P E/D\D H S\Q\V\E\G\P E s L R(-)                                           | S17 =n                 | NP_055842.1    | 23042  |
| 1505 | AL   | 5  | ETD                             | 19.32 | 1                       | (K)V/S/Y I P D E/Q I A Q G P/E N G R R/G G\F G S R G Q/P R Q G\s P V A\A\G A P\A\K(Q) | S31 =k                 | NP_006537.3    | 10642  |
| 1506 | CG   | 2  | CID                             | 23.29 | 1                       | (E)D/A Q/K/S/S s/P\A P A\D I A Q T V\Q\E(D)                                           | S7 =k,S5 =nf,S6 =nf    | NP_005745.1    | 10146  |
| 1507 | CG   | 3  | CID                             | 12.56 | 1                       | (E)D A Q K s\S S P\A P A\D I A Q\T\V\Q\E(D)                                           | S5 =k,S6 =nf,S7 =nf    | NP_005745.1    | 10146  |
| 1508 | AG   | 3  | CID                             | 21.69 | 1                       | (E)E T A/P E/D A Q K\S S\S/P A P A D I A Q T\V Q\E(D)                                 | S12 =k,S10 =nf,S11 =nf | NP_005745.1    | 10146  |
| 1509 | AG   | 3  | CID                             | 19.24 | 1                       | (E)T A/P E/D A Q K S\S s P A P A\D I A Q\T\V Q\E(D)                                   | S11 =k,S9 =nf,S10 =nf  | NP_005745.1    | 10146  |
| 1510 | CT   | 2  | CID                             | 20.76 | 1                       | (K)S s S/P A P A/D I A Q/T/V/Q/E/D/L\R(T)                                             | S2 =k,S1 =nf,S3 =nf    | NP_005745.1    | 10146  |
| 1511 | AT   | 3  | CID                             | 18.12 | 1                       | (K)S S/s P A P A D I\A/Q T V Q/E D/L\R(T)                                             | S3 =k,S1 =nf,S2 =nf    | NP_005745.1    | 10146  |
| 1512 | ET   | 3  | ETD                             | 17.86 | 1                       | (K)S/s S P/A P A\D I A\Q T V Q E D L\R(T)                                             | S2 =k,S1 =nf,S3 =nf    | NP_005745.1    | 10146  |
| 1513 | EL   | 4  | ETD                             | 11.81 | 1                       | (K)S S s P\A P A D I A/Q/T V\Q E D/L R T\F S\W A S V\T\S\K(N)                         | S3 =k,S1 =nf,S2 =nf    | NP_005745.1    | 10146  |
| 1514 | EL   | 5  | ETD                             | 18.54 | 1                       | (K)A/R R G R\s P/K\G\E\F\K D E E E\T V T T\K(H)                                       | S6 =n                  | NP_055481.1    | 9685   |
| 1515 | EL   | 4  | ETD                             | 11.25 | 1                       | (K)H I H I T Q A T E T/T t T R H\K(R)                                                 | T12 =n                 | NP_055481.1    | 9685   |
