# Supplementary material
Source: PubMed Central journal article supplement (PMC1892928)

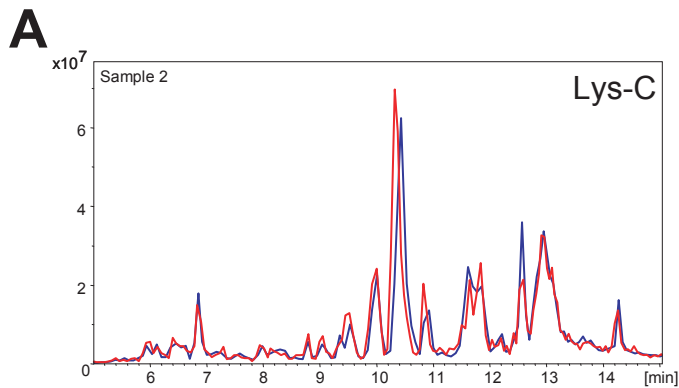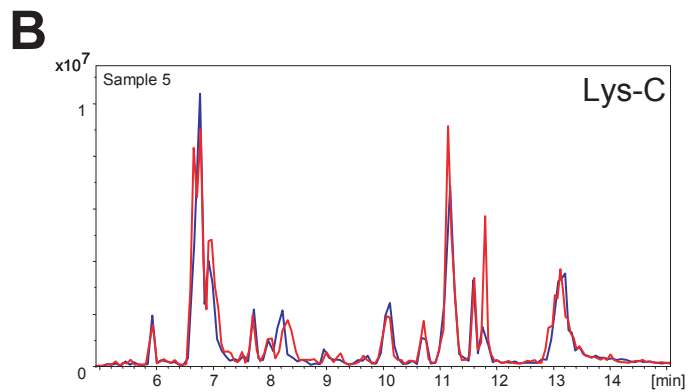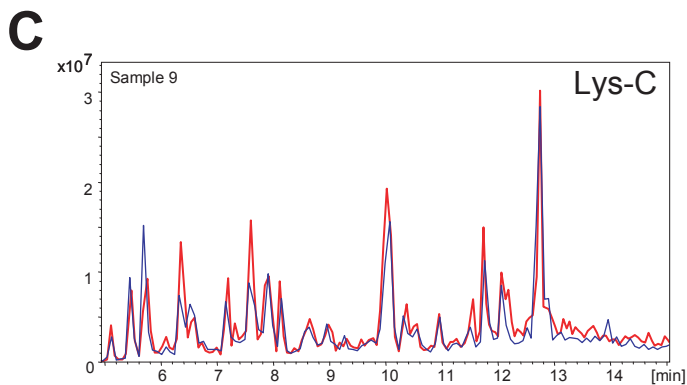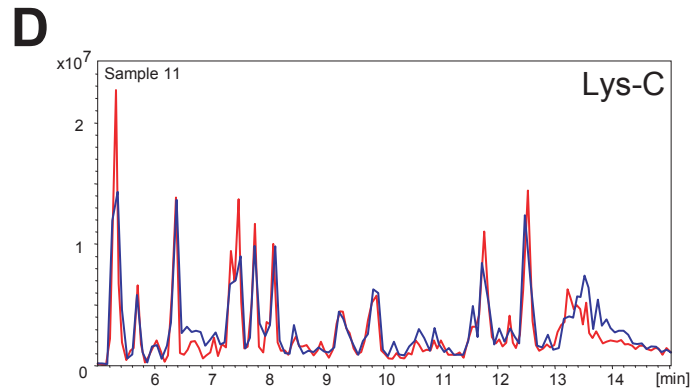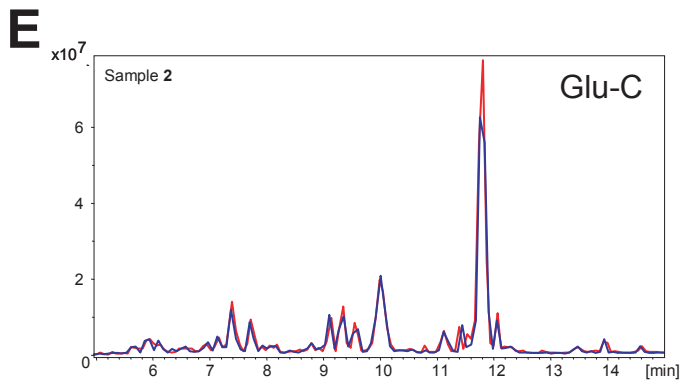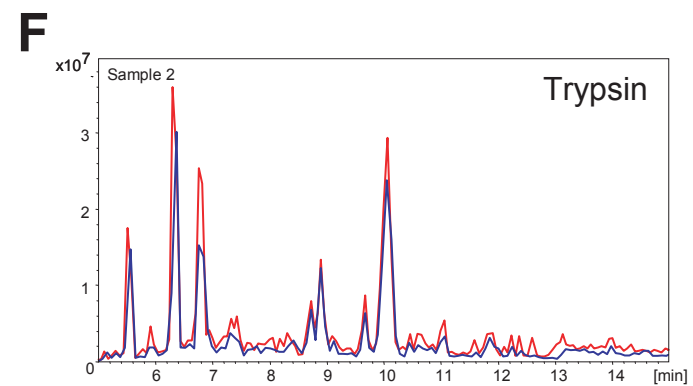

Supplement: pnas_0611217104_1.pdf [file pnas_0611217104_1.pdf]
